# Supplementary material for: Electrochemical monofluoroalkylation cyclization ofN-arylacrylamides to construct monofluorinated 2-oxindoles
Source: Royal Society of Chemistry journal article supplement (doi:10.1039/d2ob01883g), 2022-12-30

## *Supporting Information*

# **Electrochemical Monofluoroalkylation Cyclization of *N*-Arylacrylamides to Construct Monofluorinated 2- Oxindoles**

Yanxia Lv,<sup>a,b</sup> Zhong-Wei Hou,<sup>\*b</sup> Yi Wang,<sup>c</sup> Pinhua Li,<sup>a</sup> and Lei Wang<sup>\*a,b,c</sup>

<sup>a</sup> Advanced Research Institute and School of Pharmaceutical Sciences, Taizhou University, Jiaojiang, Zhejiang 318000, P. R. China

<sup>b</sup> Department of Chemistry, Huaibei Normal University, Huaibei, Anhui 235000, P. R. China

<sup>c</sup> The Second Hospital of Anhui Medical University, Hefei, Anhui 230601, P. R. China

### *Table of Contents*

|                                                                     |            |
|---------------------------------------------------------------------|------------|
| <b>1. General Considerations.....</b>                               | <b>S2</b>  |
| <b>2. General Procedure for the Electrosynthesis .....</b>          | <b>S2</b>  |
| <b>3. Cyclic Voltammetry Studies .....</b>                          | <b>S4</b>  |
| <b>4. X-Ray Crystallography .....</b>                               | <b>S5</b>  |
| <b>5. Characterization Data for the Electrolysis Products .....</b> | <b>S7</b>  |
| <b>6. Synthesis and Characterization of Unknown Substrates.....</b> | <b>S20</b> |
| <b>7. NMR Spectra of the Compounds.....</b>                         | <b>S22</b> |

## 1. General Considerations

Unless otherwise noted, chemicals and materials were purchased from commercial suppliers and used without further purification. All  $^1\text{H}$  NMR,  $^{13}\text{C}$  NMR and  $^{19}\text{F}$  NMR spectra were recorded on a 400 MHz Bruker FT-NMR spectrometer. Data were reported as chemical shifts in ppm relative to TMS (0.00 ppm) for  $^1\text{H}$  NMR and  $\text{CDCl}_3$  (77.2 ppm) for  $^{13}\text{C}$  NMR. The abbreviations used for explaining the multiplicities were as follows: s = singlet, d = doublet, t = triplet, q = quartet, m = multiplet. The coupling constants,  $J$ , are reported in Hertz (Hz). High resolution mass spectroscopy data of the product were collected on a Thermofisher Q Exactive Accurate-Mass Q-Orbitrap LC/MS (HESI). Cyclic voltammograms were obtained on a CHI 660E potentiostat. X-Ray data were collected on a Bruker SMART APEXII instrument with an I $\mu$ S Mo microsource ( $\lambda = 0.7107 \text{ \AA}$ ). Products were purified by flash chromatography on 200–300 mesh silica gels,  $\text{SiO}_2$ .

## 2. General Procedure for the Electrosynthesis

**General Procedure for the Electrosynthesis of Monofluorinated 2-Oxindoles:** A 20 mL three-necked beaker-type cell (Figure S1) was charged with  $\text{Cp}_2\text{Fe}$  (5 mol%),  $\text{Na}_2\text{CO}_3$  (0.15 mmol), *N*-methyl-*N*-phenylmethacrylamide (**1**, 0.30 mmol), and *n*- $\text{Bu}_4\text{NBF}_4$  (0.15 mmol). The cell was equipped with a reticulated vitreous carbon (RVC, 100 PPI, 1.2 cm x 0.8 cm x 0.8 cm) anode and a platinum plate (1 cm x 1 cm x 0.1 mm) cathode (Figure S1B). Dimethyl 2-fluoromalonate (**2**, 0.6 mmol), MeOH (4.0 mL) and THF (2.0 mL) were added. The electrolysis was carried out at 65 °C (oil bath temperature) using a constant current of 10 mA for 3.0 h. The reaction mixture was concentrated under reduced pressure and the residue was chromatographed through silica gel eluting with ethyl acetate/petroleum ether to give the desired product.

**General Procedure for the Electrosynthesis of Monofluorinated 2-Azaspiro[4.5]decanes:** A 20 mL three-necked beaker-type cell was charged with  $\text{Cp}_2\text{Fe}$  (10 mol%),  $\text{Na}_2\text{CO}_3$  (0.10 mmol), *N*-(*tert*-butyl)-*N*-(4-

methoxybenzyl)methacrylamide (**1**, 0.20 mmol), and *n*-Bu<sub>4</sub>NBF<sub>4</sub> (0.10 mmol). The cell was equipped with a reticulated vitreous carbon (RVC, 100 PPI, 1.2 cm x 0.8 cm x 0.8 cm) anode and a platinum plate (1 cm x 1 cm x 0.1 mm) cathode (Figure S1B). Dimethyl 2-fluoromalonate (**2**, 0.4 mmol), MeOH (5.0 mL) and THF (2.0 mL) were added. The electrolysis was carried out at 65 °C (oil bath temperature) using a constant current of 5.0 mA for 3.0 h. The reaction mixture was concentrated under reduced pressure and the residue was chromatographed through silica gel eluting with ethyl acetate/petroleum ether to give the desired product.

**General Procedure for the Gram-Scale Synthesis of 3:** The gram-scale electrolysis was conducted in a 100 mL three-necked round-bottomed flask with a piece of RVC (1.2 cm x 2 cm x 2 cm) as the anode, a Pt plate as the cathode (1.5 cm x 1.5 cm x 0.3 mm), and a constant current of 62 mA for 10 h at 65 °C (oil bath temperature). The reaction mixture consisted *N*-methyl-*N*-phenylmethacrylamide (**1**, 0.88 g, 5 mmol), dimethyl 2-fluoromalonate (**2**, 1.5 g, 10 mmol), Cp<sub>2</sub>Fe (47 mg, 5 mol %), Na<sub>2</sub>CO<sub>3</sub> (210 mg, 2.5 mmol), *n*-Bu<sub>4</sub>NBF<sub>4</sub> (823 mg, 2.5 mmol), MeOH (60 mL) and THF (30 mL). When the reaction was complete, the reaction mixture was concentrated under reduced pressure and the residue was chromatographed through silica gel eluting with ethyl acetate/petroleum ether to give the desired product **3** (0.97 g, 60% yield).

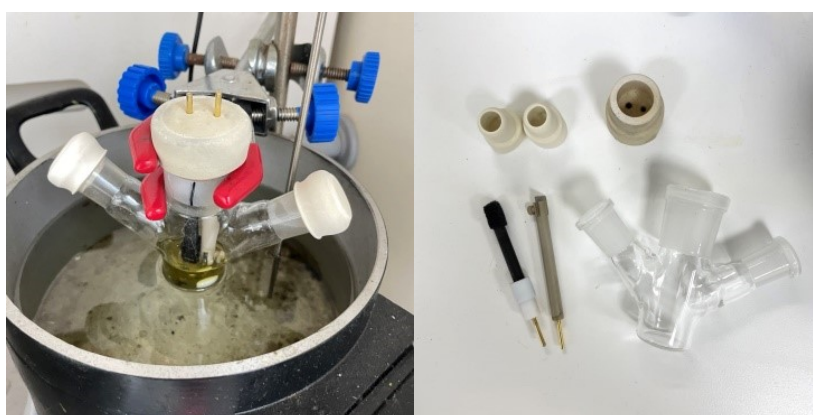

**Figure S1.** The electrolysis setup [The RVC is fixed on a sharpened graphite rod ( $\varnothing$  6 mm)].

### 3. Cyclic Voltammetry Studies

The cyclic voltammograms were recorded in an electrolyte of  $n\text{-Bu}_4\text{NBF}_4$  (0.1 M) in MeOH/THF (4:2, 5 mL) using a glassy carbon disk working electrode (diameter, 3 mm), a Pt wire auxiliary electrode and a Ag/AgCl reference electrode. The scan rate is 100 mV/s.

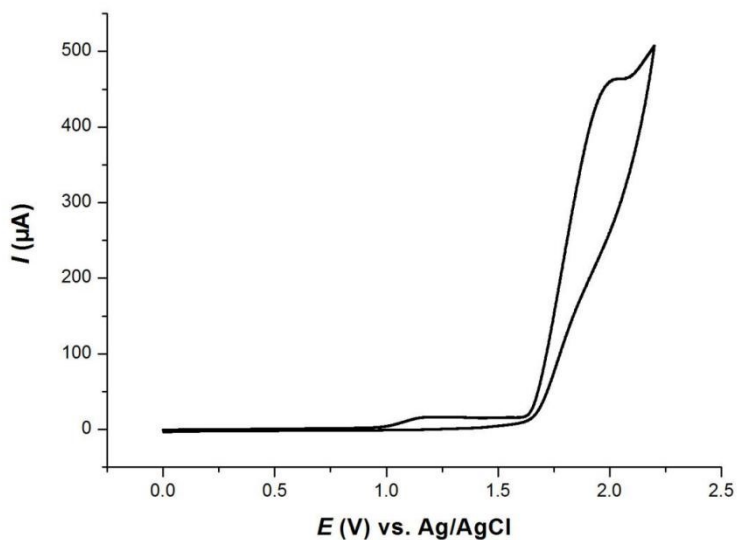

**Figure S2.** Cyclic voltammogram of **1** in an electrolyte of  $n\text{-Bu}_4\text{NBF}_4$  (0.1 M) in MeOH/THF [ $E_{p/2} = 1.79$  V].

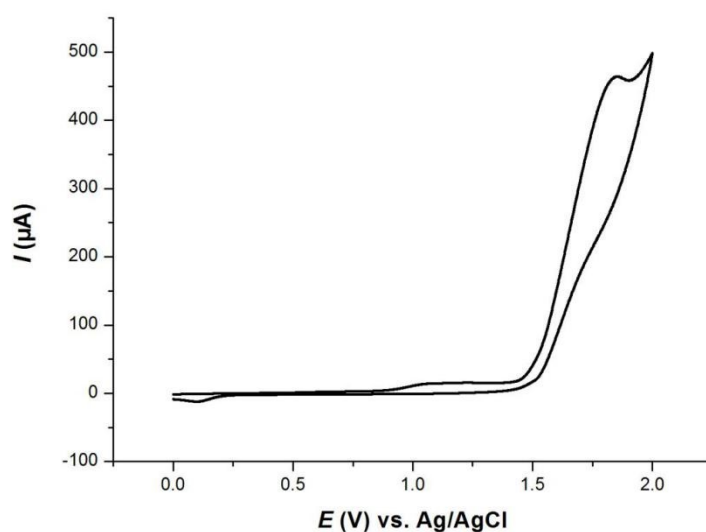

**Figure S3.** Cyclic voltammograms of **3** in an electrolyte of  $n\text{-Bu}_4\text{NBF}_4$  (0.1 M) in MeOH/THF [ $E_{p/2} = 1.64$  V].

## 4. X-Ray Crystallography

### X-Ray single crystal diffraction analysis of compound 7 (CCDC: 2177594)

Single crystals suitable for X-ray diffraction were obtained by slow evaporation of a saturated solution of each compound (petroleum ether/ $\text{CH}_2\text{Cl}_2$ ) in a loosely capped vial.

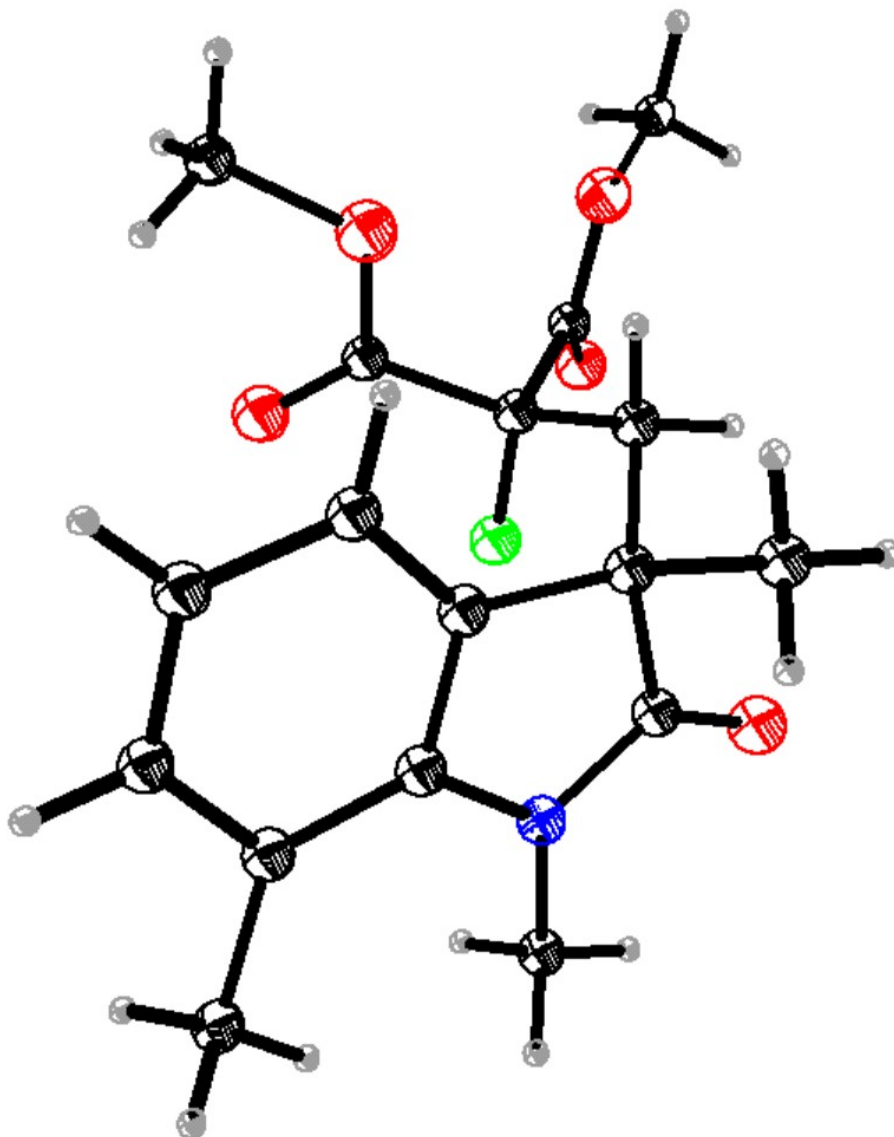

## Datablock: a

---

Bond precision: C-C = 0.0034 A Wavelength=0.71073

Cell: a=15.456(6) b=8.301(3) c=13.506(5)  
alpha=90 beta=102.264(7) gamma=90

Temperature: 296 K

|                        | Calculated     | Reported       |
|------------------------|----------------|----------------|
| Volume                 | 1693.3(11)     | 1693.3(12)     |
| Space group            | P 21/c         | P2(1)/c        |
| Hall group             | -P 2ybc        | ?              |
| Moiety formula         | C17 H20 F N O5 | ?              |
| Sum formula            | C17 H20 F N O5 | C17 H20 F N O5 |
| Mr                     | 337.34         | 337.34         |
| Dx, g cm <sup>-3</sup> | 1.323          | 1.323          |
| Z                      | 4              | 4              |
| Mu (mm <sup>-1</sup> ) | 0.104          | 0.104          |
| F000                   | 712.0          | 712.0          |
| F000'                  | 712.43         |                |
| h, k, lmax             | 18, 9, 16      | 18, 9, 16      |
| Nref                   | 2972           | 2963           |
| Tmin, Tmax             | 0.973, 0.977   | 0.973, 0.977   |
| Tmin'                  | 0.973          |                |

Correction method= # Reported T Limits: Tmin=0.973 Tmax=0.977  
AbsCorr = MULTI-SCAN

Data completeness= 0.997 Theta(max)= 24.990

R(reflections)= 0.0474( 1928) wR2(reflections)=  
0.1245( 2963)

S = 1.069 Npar= 217

## 5. Characterization Data for the Electrolysis Products

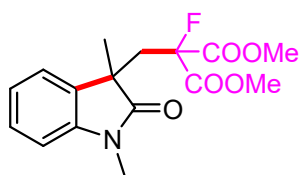

**Dimethyl 2-((1,3-dimethyl-2-oxoindolin-3-yl)methyl)-2-fluoromalonate (3)**, an known compound, please see: Z.-W. Hou, T. Jiang, T.-X. Wu and L. Wang, *Org. Lett.*, 2021, **23**, 8585–8589). Yellow solid (78 mg, 80% yield); m.p. = 117.6–118.4 °C;  $^1\text{H}$  NMR (400 MHz,  $\text{CDCl}_3$ )  $\delta$ : 7.31–7.28 (m, 1H), 7.13 (d,  $J = 7.4$  Hz, 1H), 7.03 (t,  $J = 7.4$  Hz, 1H), 6.87 (d,  $J = 7.4$  Hz, 1H), 3.76 (s, 3H), 3.40 (s, 3H), 3.23 (s, 3H), 3.01–2.91 (m, 2H), 1.39 (s, 3H);  $^{13}\text{C}$  NMR (101 MHz,  $\text{CDCl}_3$ )  $\delta$ : 179.5, 166.3 (d,  $J_{\text{C-F}} = 25.1$  Hz), 166.1 (d,  $J_{\text{C-F}} = 25.1$  Hz), 144.0, 130.4, 128.7, 124.3, 121.9, 108.5, 93.2 (d,  $J_{\text{C-F}} = 204.8$  Hz), 53.7, 53.4, 45.3 (d,  $J_{\text{C-F}} = 1.7$  Hz), 41.1 (d,  $J_{\text{C-F}} = 19.2$  Hz), 26.5, 25.8;  $^{19}\text{F}$  NMR (377 MHz,  $\text{CDCl}_3$ )  $\delta$ : –169.2.

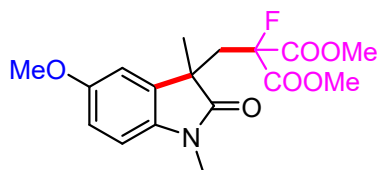

**Dimethyl 2-fluoro-2-((5-methoxy-1,3-dimethyl-2-oxoindolin-3-yl)methyl)malonate (4)**. Yellow oil (62.5 mg, 59% yield);  $^1\text{H}$  NMR (400 MHz,  $\text{CDCl}_3$ )  $\delta$ : 6.83–6.80 (m, 1H), 6.77–6.75 (m, 2H), 3.80 (s, 3H), 3.76 (s, 3H), 3.46 (s, 3H), 3.20 (s, 3H), 2.98–2.87 (m, 2H), 1.38 (s, 3H);  $^{13}\text{C}$  NMR (101 MHz,  $\text{CDCl}_3$ )  $\delta$ : 179.1, 166.3 (d,  $J_{\text{C-F}} = 25.1$  Hz), 166.0 (d,  $J_{\text{C-F}} = 25.1$  Hz), 155.5, 137.4, 131.7, 112.7, 111.9, 108.7, 93.1 (d,  $J_{\text{C-F}} = 204.8$  Hz), 55.8, 53.7, 45.7 (d,  $J_{\text{C-F}} = 1.8$  Hz), 41.1 (d,  $J_{\text{C-F}} = 19.2$  Hz), 26.5, 25.8;  $^{19}\text{F}$  NMR (377 MHz,  $\text{CDCl}_3$ )  $\delta$ : –169.4; HRMS (ESI) ( $[\text{M}+\text{H}]^+$ ) Calcd. for  $\text{C}_{17}\text{H}_{20}\text{FNO}_6^+$ : 354.1347, Found: 354.1342.

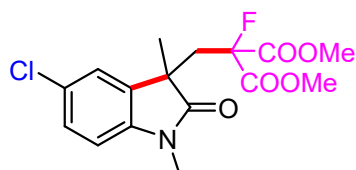

**Dimethyl 2-((5-chloro-1,3-dimethyl-2-oxoindolin-3-yl)methyl)-2-fluoromalonate (5)**.

White solid (86 mg, 80% yield); m.p. = 107.8–109.6 °C; <sup>1</sup>H NMR (400 MHz, CDCl<sub>3</sub>) δ: 7.28–7.26 (m, 1H), 7.09 (d, *J* = 2.0 Hz, 1H), 6.79 (d, *J* = 8.3 Hz, 1H), 3.77 (s, 3H), 3.54 (s, 3H), 3.21 (s, 3H), 3.01–2.87 (m, 2H), 1.39 (s, 3H); <sup>13</sup>C NMR (101 MHz, CDCl<sub>3</sub>) δ: 179.0, 166.1 (d, *J*<sub>C-F</sub> = 25.1 Hz), 165.9 (d, *J*<sub>C-F</sub> = 25.1 Hz), 142.6, 132.3, 128.7, 127.3, 124.7, 109.5, 93.0 (d, *J*<sub>C-F</sub> = 204.1 Hz), 53.9, 53.5, 45.5 (d, *J*<sub>C-F</sub> = 2.1 Hz), 41.0 (d, *J*<sub>C-F</sub> = 19.2 Hz), 26.7, 25.7; <sup>19</sup>F NMR (377 MHz, CDCl<sub>3</sub>) δ: –168.9; HRMS (ESI) ([M+H]<sup>+</sup>) Calcd. for C<sub>16</sub>H<sub>18</sub>ClFNO<sub>5</sub><sup>+</sup>: 358.0852, Found: 358.0849.

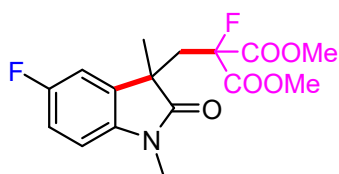

**Dimethyl 2-fluoro-2-((5-fluoro-1,3-dimethyl-2-oxoindolin-3-yl)methyl)malonate (6).**

Yellow oil (56 mg, 55% yield); <sup>1</sup>H NMR (400 MHz, CDCl<sub>3</sub>) δ: 7.00 (td, *J* = 8.7, 2.6 Hz, 1H), 6.89 (dd, *J* = 8.0, 2.6 Hz, 1H), 6.79 (dd, *J* = 8.7, 4.1 Hz, 1H), 3.77 (s, 3H), 3.52 (s, 3H), 3.21 (s, 3H), 3.03–2.87 (m, 2H), 1.39 (s, 3H); <sup>13</sup>C NMR (101 MHz, CDCl<sub>3</sub>) δ: 179.1, 166.1 (d, *J*<sub>C-F</sub> = 26.4 Hz), 165.9 (d, *J*<sub>C-F</sub> = 26.4 Hz), 159.9 (d, *J*<sub>C-F</sub> = 239.9 Hz), 139.9 (d, *J*<sub>C-F</sub> = 2.0 Hz), 132.2 (d, *J*<sub>C-F</sub> = 7.9 Hz), 114.9 (d, *J*<sub>C-F</sub> = 23.3 Hz), 112.2 (d, *J*<sub>C-F</sub> = 24.8 Hz), 109.0 (d, *J*<sub>C-F</sub> = 8.3 Hz), 93.0 (d, *J*<sub>C-F</sub> = 204.2 Hz), 53.8, 53.3, 45.7 (d, *J*<sub>C-F</sub> = 3.4 Hz), 40.8 (d, *J*<sub>C-F</sub> = 19.1 Hz), 26.6, 25.7; <sup>19</sup>F NMR (377 MHz, CDCl<sub>3</sub>) δ: –121.6, –168.9; HRMS (ESI) ([M+H]<sup>+</sup>) Calcd. for C<sub>16</sub>H<sub>18</sub>F<sub>2</sub>NO<sub>5</sub><sup>+</sup>: 342.1148, Found: 342.1144.

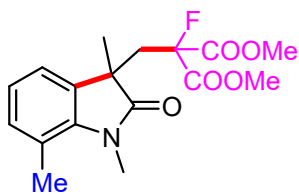

**Dimethyl 2-fluoro-2-((1,3,7-trimethyl-2-oxoindolin-3-yl)methyl)malonate (7).**

White solid (40.5 mg, 40% yield); m.p. = 99.9–102.2 °C; <sup>1</sup>H NMR (400 MHz, CDCl<sub>3</sub>) δ: 7.00 (d, *J* = 8.3 Hz, 1H), 6.95–6.88 (m, 2H), 3.76 (s, 3H), 3.50 (s, 3H), 3.41 (s, 3H), 2.99–2.86 (m, 2H), 2.58 (s, 3H), 1.37 (s, 3H); <sup>13</sup>C NMR (101 MHz, CDCl<sub>3</sub>) δ: 180.3, 166.3 (d, *J*<sub>C-F</sub> = 30.3 Hz), 166.2 (d, *J*<sub>C-F</sub> = 30.3 Hz), 141.8, 132.4, 131.0, 122.1, 121.8, 120.2, 93.2, (d, *J*<sub>C-F</sub> = 202.0 Hz), 53.8,



53.4, 44.6 (d,  $J_{C-F} = 2.1$  Hz), 41.3 (d,  $J_{C-F} = 20.2$  Hz), 29.9, 26.2, 19.3;  $^{19}\text{F}$  NMR (377 MHz,  $\text{CDCl}_3$ )  $\delta$ : -169.1; HRMS (ESI) ( $[\text{M}+\text{H}]^+$ ) Calcd. for  $\text{C}_{17}\text{H}_{21}\text{FNO}_5^+$ : 338.1398, Found: 338.1394.

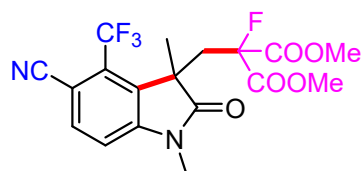

**Dimethyl 2-((5-cyano-1,3-dimethyl-2-oxo-4-(trifluoromethyl)indolin-3-yl)methyl)-2-fluoromalonate (8).** Yellow solid (51 mg, 41% yield); m.p. = 104.5–105.7 °C;  $^1\text{H}$  NMR (400 MHz,  $\text{CDCl}_3$ )  $\delta$ : 7.85 (d,  $J = 8.0$  Hz, 1H), 7.12 (d,  $J = 8.2$  Hz, 1H), 3.76 (s, 3H), 3.61 (s, 3H), 3.28 (s, 3H), 3.17–3.02 (m, 2H), 1.53 (s, 3H);  $^{13}\text{C}$  NMR (101 MHz,  $\text{CDCl}_3$ )  $\delta$ : 178.4, 165.7 (d,  $J_{C-F} = 26.0$  Hz), 165.5 (d,  $J_{C-F} = 26.0$  Hz), 148.9, 137.0, 130.5, 129.9 (q,  $J_{C-F} = 33.9$  Hz), 122.7 (q,  $J_{C-F} = 275.2$  Hz), 116.5, 111.4, 104.0 (q,  $J_{C-F} = 2.8$  Hz), 92.6 (d,  $J_{C-F} = 199.8$  Hz), 53.8, 53.7, 47.2, 40.3 (dq,  $J_{C-F} = 18.5, 4.5$  Hz), 27.1, 24.5 (q,  $J_{C-F} = 3.6$  Hz);  $^{19}\text{F}$  NMR (377 MHz,  $\text{CDCl}_3$ )  $\delta$ : -55.8, -165.4; HRMS (ESI) ( $[\text{M}+\text{H}]^+$ ) Calcd. for  $\text{C}_{18}\text{H}_{17}\text{F}_4\text{N}_2\text{O}_5^+$ : 417.1068, Found: 417.1068.

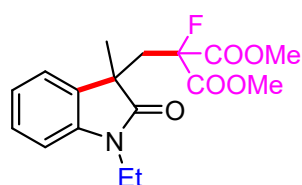

**Dimethyl 2-((1-ethyl-3-methyl-2-oxoindolin-3-yl)methyl)-2-fluoromalonate (9).** Yellow oil (70 mg, 69% yield);  $^1\text{H}$  NMR (400 MHz,  $\text{CDCl}_3$ )  $\delta$ : 7.29–7.25 (m, 1H), 7.12 (d,  $J = 7.5$  Hz, 1H), 7.01 (t,  $J = 7.5$  Hz, 1H), 6.87 (d,  $J = 7.5$  Hz, 1H), 3.91–3.86 (m, 1H), 3.76 (s, 3H), 3.70–3.61 (m, 1H), 3.37 (s, 3H), 3.00–2.89 (m, 2H), 1.38 (s, 3H), 1.27 (t,  $J = 7.2$  Hz, 3H);  $^{13}\text{C}$  NMR (101 MHz,  $\text{CDCl}_3$ )  $\delta$ : 179, 166.3 (d,  $J_{C-F} = 25.0$  Hz), 166.1 (d,  $J_{C-F} = 25.0$  Hz), 143.2, 130.6, 128.6, 124.6, 121.6, 108.6, 93.3 (d,  $J_{C-F} = 205.6$  Hz), 53.7, 53.3, 45.2 (d,  $J_{C-F} = 1.0$  Hz), 40.1 (d,  $J_{C-F} = 19.6$  Hz), 34.8, 25.9, 12.2;  $^{19}\text{F}$  NMR (377 MHz,  $\text{CDCl}_3$ )  $\delta$ : -168.3; HRMS (ESI) ( $[\text{M}+\text{H}]^+$ ) Calcd. for  $\text{C}_{17}\text{H}_{21}\text{FNO}_5^+$ : 338.1398, Found: 338.1396.

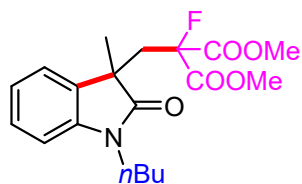

**Dimethyl 2-((1-butyl-3-methyl-2-oxoindolin-3-yl)methyl)-2-fluoromalonate (10).** Yellow oil (67 mg, 60% yield);  $^1\text{H}$  NMR (400 MHz,  $\text{CDCl}_3$ )  $\delta$ : 7.28–7.24 (m, 1H), 7.12 (d,  $J = 7.3$  Hz, 1H), 7.00 (t,  $J = 7.5$  Hz, 1H), 6.87 (d,  $J = 7.8$  Hz, 1H), 3.81–3.75 (m, 4H), 3.66–3.58 (m, 1H), 3.37 (s, 3H), 3.00–2.89 (m, 2H), 1.71–1.64 (m, 2H), 1.49–1.40 (m, 2H), 1.38 (s, 3H), 0.97 (t,  $J = 7.4$  Hz, 3H);  $^{13}\text{C}$  NMR (101 MHz,  $\text{CDCl}_3$ )  $\delta$ : 179.3, 166.3 (d,  $J_{\text{C-F}} = 25.0$  Hz), 166.1 (d,  $J_{\text{C-F}} = 25.0$  Hz), 143.6, 130.5, 128.6, 124.5, 121.6, 108.7, 93.2 (d,  $J_{\text{C-F}} = 205.7$  Hz), 53.7, 53.3, 45.2, 40.9 (d,  $J_{\text{C-F}} = 19.6$  Hz), 40.0, 29.2, 26.2, 20.3, 13.9;  $^{19}\text{F}$  NMR (377 MHz,  $\text{CDCl}_3$ )  $\delta$ : –168.5; HRMS (ESI) ( $[\text{M}+\text{H}]^+$ ) Calcd. for  $\text{C}_{19}\text{H}_{25}\text{F}_2\text{NO}_5^+$ : 361.1711, Found: 361.1707.

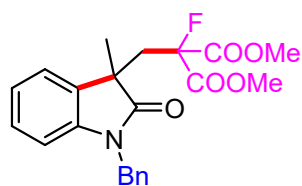

**Dimethyl 2-((1-benzyl-3-methyl-2-oxoindolin-3-yl)methyl)-2-fluoromalonate (11).** White solid (66 mg, 55% yield); m.p. = 82.4–85.3 °C;  $^1\text{H}$  NMR (400 MHz,  $\text{CDCl}_3$ )  $\delta$ : 7.33 (d,  $J = 4.4$  Hz, 5H), 7.16–7.11 (m, 2H), 6.99 (t,  $J = 7.5$  Hz, 1H), 6.68 (t,  $J = 7.5$  Hz, 1H), 4.94 (s, 2H), 3.78 (s, 3H), 3.32 (s, 3H), 3.06–2.96 (m, 2H), 1.45 (s, 3H);  $^{13}\text{C}$  NMR (101 MHz,  $\text{CDCl}_3$ )  $\delta$ : 179.6, 166.4 (d,  $J_{\text{C-F}} = 24.9$  Hz), 166.2 (d,  $J_{\text{C-F}} = 24.9$  Hz), 143.1, 136.0, 130.4, 128.9, 128.6, 127.6, 127.3 (d,  $J_{\text{C-F}} = 1.1$  Hz), 124.4, 122.0, 109.7, 93.3 (d,  $J_{\text{C-F}} = 205.7$  Hz), 53.8, 53.3, 45.3, 44.1, 40.8 (d,  $J_{\text{C-F}} = 19.5$  Hz), 26.7;  $^{19}\text{F}$  NMR (377 MHz,  $\text{CDCl}_3$ )  $\delta$ : –167.9; HRMS (ESI) ( $[\text{M}+\text{H}]^+$ ) Calcd. for  $\text{C}_{22}\text{H}_{23}\text{FNO}_5^+$ : 400.1555, Found: 400.1555.

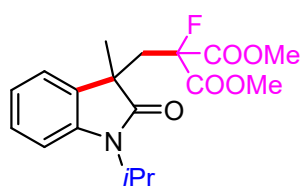

**Dimethyl 2-fluoro-2-((1-isopropyl-3-methyl-2-oxoindolin-3-yl)methyl)malonate (12).** Yellow oil (79 mg, 75% yield);  $^1\text{H}$  NMR (400 MHz,  $\text{CDCl}_3$ )  $\delta$ : 7.24 (t,  $J = 7.7$  Hz, 1H), 7.12

(d,  $J = 7.3$ , 1H), 7.03–6.97 (m, 2H), 4.67–4.60 (m, 1H), 3.76 (s, 3H), 3.35 (s, 3H), 2.9 8–2.87 (m, 2H), 1.49 (t,  $J = 6.9$  Hz, 6H), 1.37 (s, 3H);  $^{13}\text{C}$  NMR (101 MHz,  $\text{CDCl}_3$ )  $\delta$ : 179.0, 166.2 (d,  $J_{\text{C-F}} = 24.8$  Hz), 166.1 (d,  $J_{\text{C-F}} = 24.8$  Hz), 142.7, 130.8, 128.4, 124.6, 121.3, 110.2, 93.2 (d,  $J_{\text{C-F}} = 205.7$  Hz), 54.2, 53.7, 53.3, 44.9, 43.9, 41.1 (d,  $J_{\text{C-F}} = 19.1$  Hz), 26.1, 19.4, 18.9;  $^{19}\text{F}$  NMR (377 MHz,  $\text{CDCl}_3$ )  $\delta$ : -168.5; HRMS (ESI) ( $[\text{M}+\text{H}]^+$ ) Calcd. for  $\text{C}_{18}\text{H}_{23}\text{FNO}_5^+$ : 352.1555, Found: 352.1552.

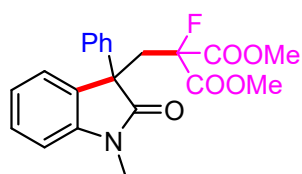

**Dimethyl 2-fluoro-2-((1-methyl-2-oxo-3-phenylindolin-3-yl)methyl)malonate (13).**

Yellow oil (71 mg, 61% yield);  $^1\text{H}$  NMR (400 MHz,  $\text{CDCl}_3$ )  $\delta$ : 7.37–7.33 (m, 3H), 7.31–7.24 (m, 3H), 7.20 (d,  $J = 7.9$  Hz, 1H), 7.08 (t,  $J = 7.5$  Hz, 1H), 6.92 (d,  $J = 7.9$  Hz, 1H), 3.79 (s, 3H), 3.54 (dd,  $J = 15.0, 6.8$  Hz, 1H), 3.46–3.35 (m, 4H), 3.23 (s, 3H);  $^{13}\text{C}$  NMR (101 MHz,  $\text{CDCl}_3$ )  $\delta$ : 177.7, 166.4 (d,  $J_{\text{C-F}} = 25.4$  Hz), 166.1 (d,  $J_{\text{C-F}} = 25.4$  Hz), 144.9, 139.7, 129.2, 128.8, 128.7, 127.8, 126.9, 126.7, 121.9, 108.9, 93.3 (d,  $J_{\text{C-F}} = 206.2$  Hz), 53.9, 53.5, 53.1 (d,  $J_{\text{C-F}} = 1.7$  Hz), 40.9 (d,  $J_{\text{C-F}} = 18.4$  Hz), 26.8;  $^{19}\text{F}$  NMR (377 MHz,  $\text{CDCl}_3$ )  $\delta$ : -169.1 (dd,  $J = 31.4, 6.8$  Hz); HRMS (ESI) ( $[\text{M}+\text{H}]^+$ ) Calcd. for  $\text{C}_{21}\text{H}_{21}\text{FNO}_5^+$ : 386.1398, Found: 386.1398.

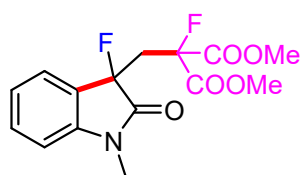

**Dimethyl 2-fluoro-2-((3-fluoro-1-methyl-2-oxoindolin-3-yl)methyl)malonate (14).**

White solid (40.5 mg, 40% yield); m.p. = 86.8–87.9 °C;  $^1\text{H}$  NMR (400 MHz,  $\text{CDCl}_3$ )  $\delta$ : 7.50–7.45 (m, 1H), 7.44–7.38 (m, 1H), 7.13–7.07 (m, 1H), 6.86 (d,  $J = 7.9$  Hz, 1H), 3.80 (s, 3H), 3.60 (s, 3H), 3.36 (ddd,  $J = 32.6, 15.0, 10.0$  Hz, 1H), 3.20 (s, 3H), 3.10 (td,  $J = 15.0, 10.0$  Hz, 1H);  $^{13}\text{C}$  NMR (101 MHz,  $\text{CDCl}_3$ )  $\delta$ : 171.8 (d,  $J_{\text{C-F}} = 20.2$  Hz), 165.8 (d,  $J_{\text{C-F}} = 25.0$  Hz), 165.4 (d,  $J_{\text{C-F}} = 25.1$  Hz), 144.9 (d,  $J_{\text{C-F}} = 5.5$  Hz), 132.1 (d,  $J_{\text{C-F}} = 3.2$  Hz), 126.7 (dd,  $J_{\text{C-F}} = 4.1, 1.4$  Hz), 123.5 (d,  $J_{\text{C-F}} = 18.1$  Hz), 123.0 (d,  $J_{\text{C-F}} = 2.9$  Hz), 109.1 (d,  $J_{\text{C-F}} = 1.4$  Hz), 91.9 (dd,  $J_{\text{C-F}}$

= 202.7, 9.0 Hz), 90.6 (d,  $J_{C-F}$  = 186.1 Hz), 54.0, 53.7, 38.5 (dd,  $J_{C-F}$  = 32.0, 19.3 Hz), 26.5;  
 $^{19}\text{F}$  NMR (377 MHz,  $\text{CDCl}_3$ )  $\delta$ : -152.2 (dd,  $J$  = 15.0, 10.0 Hz), -165.7 (dd,  $J$  = 32.6, 10.0 Hz);  
HRMS (ESI) ( $[\text{M}+\text{H}]^+$ ) Calcd. for  $\text{C}_{15}\text{H}_{16}\text{F}_2\text{NO}_5^+$ : 328.0991, Found: 328.0990.

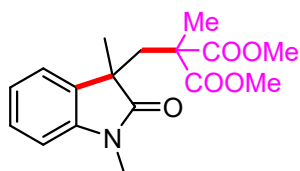

**Dimethyl 2-((1,3-dimethyl-2-oxoindolin-3-yl)methyl)-2-methylmalonate (15).** Yellow oil (46 mg, 48% yield);  $^1\text{H}$  NMR (400 MHz,  $\text{CDCl}_3$ )  $\delta$ : 7.26 (dd,  $J$  = 7.7, 1.4 Hz, 1H), 7.10 (dd,  $J$  = 7.5, 1.4 Hz, 1H), 7.03 (td,  $J$  = 7.4, 1.1 Hz, 1H), 6.86 (d,  $J$  = 7.7 Hz, 1H), 3.67 (s, 3H), 3.39 (s, 3H), 3.22 (s, 3H), 2.81–2.72 (m, 2H), 1.36 (s, 3H), 1.03 (s, 3H);  $^{13}\text{C}$  NMR (101 MHz,  $\text{CDCl}_3$ )  $\delta$ : 180.0, 172.6, 171.8, 143.3, 131.8, 128.3, 124.1, 122.2, 108.4, 53.0, 52.9, 52.4, 46.3, 41.3, 28.0, 26.4, 19.1; HRMS (ESI) ( $[\text{M}+\text{H}]^+$ ) Calcd. for  $\text{C}_{17}\text{H}_{22}\text{FNO}_5^+$ : 320.1492, Found: 320.1491.

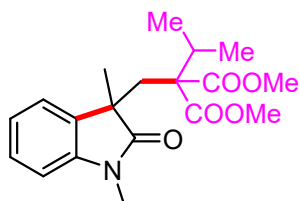

**Dimethyl 2-((1,3-dimethyl-2-oxoindolin-3-yl)methyl)-2-isopropylmalonate (16).** Yellow solid (26 mg, 25% yield); m.p. = 101.6–103.2 °C;  $^1\text{H}$  NMR (400 MHz,  $\text{CDCl}_3$ )  $\delta$ : 7.24 (td,  $J$  = 7.8, 1.2 Hz, 1H), 7.16 (dd,  $J$  = 7.8, 1.2 Hz, 1H), 7.00 (td,  $J$  = 7.8, 1.2 Hz, 1H), 6.82 (d,  $J$  = 7.8 Hz, 1H), 3.56 (s, 3H), 3.35 (s, 3H), 3.20 (s, 3H), 2.68 (s, 2H), 2.17–2.09 (m, 1H), 1.35 (s, 3H), 0.90 (d,  $J$  = 6.8 Hz, 3H), 0.84 (d,  $J$  = 6.8 Hz, 3H);  $^{13}\text{C}$  NMR (101 MHz,  $\text{CDCl}_3$ )  $\delta$ : 179.8, 171.0, 170.2, 143.6, 132.3, 128.0, 124.0, 121.9, 108.1, 60.3, 52.0, 51.7, 46.8, 40.0, 33.3, 29.0, 26.4, 19.2, 18.5; HRMS (ESI) ( $[\text{M}+\text{H}]^+$ ) Calcd. for  $\text{C}_{19}\text{H}_{26}\text{NO}_5^+$ : 348.1805 Found: 348.1805.

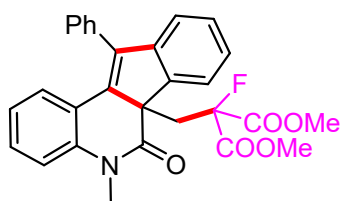

**Dimethyl**

**2-fluoro-2-((5-methyl-6-oxo-11-phenyl-5,6-dihydro-6aH-indeno[1,2-c]quinolin-6a-yl)methyl)malonate (17).** White solid (64 mg, 66% yield); m.p. = 152.4–153.2 °C; <sup>1</sup>H NMR (400 MHz, CDCl<sub>3</sub>) δ: 7.99–7.94 (m, 1H), 7.46–7.37 (m, 5H), 7.34–7.26 (m, 3H), 7.18–7.09 (m, 3H), 6.94–6.89 (m, 1H), 3.63 (s, 3H), 3.44 (s, 3H), 3.35–3.22 (m, 4H), 2.68 (dd, *J* = 15.2, 11.4 Hz, 1H); <sup>13</sup>C NMR (101 MHz, CDCl<sub>3</sub>) δ: 168.6, 165.9 (d, *J*<sub>C-F</sub> = 25.6 Hz), 165.2 (d, *J*<sub>C-F</sub> = 25.6 Hz), 146.3, 140.7, 139.4, 135.6, 134.0, 129.3, 128.8, 128.7, 128.5, 128.1, 127.6, 127.4, 125.5, 123.2, 121.9, 121.8, 120.8, 115.3, 92.9 (d, *J*<sub>C-F</sub> = 205.4 Hz), 57.5, 53.7, 53.2, 39.4 (d, *J*<sub>C-F</sub> = 19.2 Hz), 30.9; <sup>19</sup>F NMR (377 MHz, CDCl<sub>3</sub>) δ: -162.9 (dd, *J* = 32.7, 11.4 Hz); HRMS (ESI) ([M+H]<sup>+</sup>) Calcd. for C<sub>29</sub>H<sub>25</sub>FNO<sub>5</sub><sup>+</sup>: 486.1711, Found: 486.1708.

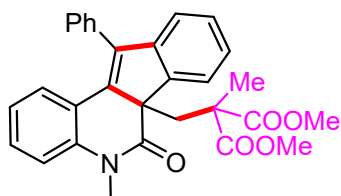

**Dimethyl 2-methyl-2-((5-methyl-6-oxo-11-phenyl-5,6-dihydro-6aH-indeno[1,2-c]quinolin-6a-yl)methyl)malonate (18).** White solid (56.7 mg, 59% yield); m.p. = 208.3–209.1 °C; <sup>1</sup>H NMR (400 MHz, CDCl<sub>3</sub>) δ: 7.94–7.89 (m, 1H), 7.47–7.37 (m, 5H), 7.32–7.25 (m, 3H), 7.19–7.14 (m, 1H), 7.12–7.07 (m, 2H), 6.92–6.87 (m, 1H), 3.44 (s, 3H), 3.43 (s, 3H), 3.33 (s, 3H), 3.13 (d, *J* = 14.6 Hz, 1H), 2.57 (d, *J* = 14.6 Hz, 1H), 1.05 (s, 3H); <sup>13</sup>C NMR (101 MHz, CDCl<sub>3</sub>) δ: 172.3, 171.2, 169.5, 145.6, 141.8, 141.1, 139.8, 136.0, 134.0, 129.0, 128.9, 128.7, 128.3, 128.1, 127.4 (2C), 125.5, 122.9, 121.9, 120.9, 115.5, 59.2, 53.2, 52.7, 52.3, 39.8, 31.0, 19.9; HRMS (ESI) ([M+H]<sup>+</sup>) Calcd. for C<sub>30</sub>H<sub>28</sub>FNO<sub>5</sub><sup>+</sup>: 482.1962, Found: 482.1962.

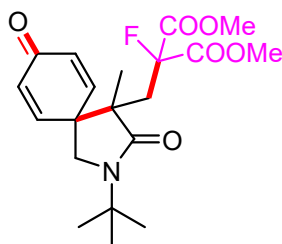

**Dimethyl 2-((2-(*tert*-butyl)-4-methyl-8-oxo-2-azaspiro[4.5]deca-6,9-dien-4-yl)methyl)-2-fluoromalonate (19).** Yellow oil (53 mg, 70% yield);  $^1\text{H}$  NMR (400 MHz,  $\text{CDCl}_3$ )  $\delta$ : 6.96 (dd,  $J = 10.1, 3.1$  Hz, 1H), 6.86 (dd,  $J = 10.1, 3.1$  Hz, 1H), 6.45–6.38 (m, 2H), 3.84 (s, 3H), 3.78 (s, 3H), 3.49 (d,  $J = 10.4$  Hz, 1H), 3.25 (d,  $J = 10.4$  Hz, 1H), 2.15 (dd,  $J = 15.7, 8.1$  Hz, 1H), 1.40 (s, 9H), 1.25 (s, 3H);  $^{13}\text{C}$  NMR (151 MHz,  $\text{CDCl}_3$ )  $\delta$ : 185.1, 175.0, 167.0(d,  $J_{\text{C-F}} = 26.1$  Hz), 166.6 (d,  $J_{\text{C-F}} = 25.1$  Hz), 148.8, 147.5, 131.8, 130.6, 93.59 (d,  $J_{\text{C-F}} = 205.1$  Hz), 54.8, 53.8, 53.6, 52.6, 50.2, 48.0, 36.8 (d,  $J_{\text{C-F}} = 19.5$  Hz), 27.6, 17.8 (d,  $J_{\text{C-F}} = 3.4$  Hz);  $^{19}\text{F}$  NMR (377 MHz,  $\text{CDCl}_3$ )  $\delta$ : -163.9; HRMS (ESI) ( $[\text{M}+\text{H}]^+$ ) Calcd. for  $\text{C}_{22}\text{H}_{27}\text{FNO}_6^+$ : 396.1817, Found: 396.1817.

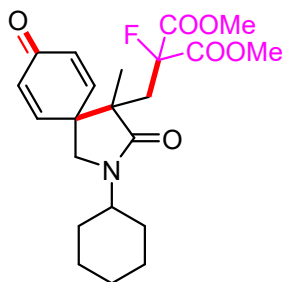

**Dimethyl 2-((2-(cyclohexyl)-4-methyl-3,8-dioxo-2-azaspiro[4.5]deca-6,9-dien-4-yl)methyl)-2-fluoromalonate (20).** Yellow oil (52 mg, 64% yield);  $^1\text{H}$  NMR (400 MHz,  $\text{CDCl}_3$ )  $\delta$ : 6.95–6.83 (m, 2H), 6.50–6.35 (m, 2H), 3.85 (s, 3H), 3.79 (s, 3H), 3.40 (d,  $J = 10.4$  Hz, 1H), 3.22 (d,  $J = 10.4$  Hz, 1H), 2.85 (dd,  $J = 35.5, 15.6$  Hz, 1H), 2.13 (dd,  $J = 15.6, 8.9$  Hz, 1H), 1.90–1.64 (m, 6H), 1.44–1.29 (m, 5H), 1.27 (s, 3H);  $^{13}\text{C}$  NMR (101 MHz,  $\text{CDCl}_3$ )  $\delta$ : 185.0, 174.1, 166.8 (d,  $J_{\text{C-F}} = 25.3$  Hz), 166.5 (d,  $J_{\text{C-F}} = 25.0$  Hz), 148.2, 147.6, 131.7, 130.9, 93.6 (d,  $J_{\text{C-F}} = 206.2$  Hz), 53.9, 53.6, 52.0, 51.1, 48.9, 48.0, 36.6 (d,  $J_{\text{C-F}} = 19.7$  Hz), 30.0, 25.4, 25.3, 18.2 (d,  $J_{\text{C-F}} = 4.6$  Hz);  $^{19}\text{F}$  NMR (376 MHz,  $\text{CDCl}_3$ )  $\delta$ : -164.2; HRMS (ESI) ( $[\text{M}+\text{H}]^+$ ) Calcd. for  $\text{C}_{22}\text{H}_{29}\text{FNO}_6^+$ : 422.1973, Found: 422.1975.

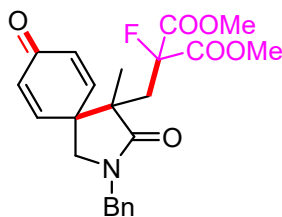

**Dimethyl 2-((2-benzyl-4-methyl-3,8-dioxo-2-azaspiro[4.5]deca-6,9-dien-4-yl)methyl)-2-fluoromalonate (21).** Yellow oil (26 mg, 30% yield);  $^1\text{H}$  NMR (400 MHz,  $\text{CDCl}_3$ )  $\delta$ : 7.38–7.32 (m, 3H), 7.24 (d,  $J = 7.8$  Hz, 2H), 6.87 (dd,  $J = 10.4, 3.1$  Hz, 1H), 6.77 (dd,  $J = 10.4, 3.1$  Hz, 1H), 6.38–6.34 (m, 2H), 4.67 (d,  $J = 14.5$  Hz, 1H), 4.29 (d,  $J = 14.5$  Hz, 1H), 3.88 (s, 3H), 3.81 (s, 3H), 3.27 (d,  $J = 10.5$  Hz, 1H), 3.11 (d,  $J = 10.5$  Hz, 1H), 2.89 (dd,  $J = 34.9, 15.6$  Hz, 1H), 2.17 (dd,  $J = 15.6, 9.1$  Hz, 1H), 1.29 (s, 3H);  $^{13}\text{C}$  NMR (101 MHz,  $\text{CDCl}_3$ )  $\delta$ : 184.9, 174.8, 166.9 (d,  $J_{\text{C-F}} = 25.5$  Hz), 166.6 (d,  $J_{\text{C-F}} = 25.1$  Hz), 148.0, 147.2, 135.5, 131.7, 130.9, 129.2, 128.6, 128.3, 93.7 (d,  $J_{\text{C-F}} = 206.3$  Hz), 54.0, 53.7, 51.8, 51.8, 51.0, 48.8, 47.2, 36.9 (d,  $J_{\text{C-F}} = 19.8$  Hz), 18.5 (d,  $J_{\text{C-F}} = 4.5$  Hz);  $^{19}\text{F}$  NMR (376 MHz,  $\text{CDCl}_3$ )  $\delta$ : -164.3; HRMS (ESI) ( $[\text{M}+\text{H}]^+$ ) Calcd. for  $\text{C}_{23}\text{H}_{25}\text{FNO}_6^+$ : 430.16601711, Found: 430.1664.

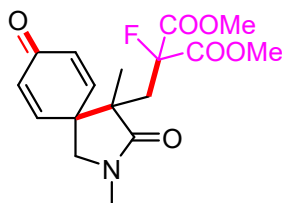

**Dimethyl 2-((2,4-dimethyl-3,8-dioxo-2-azaspiro[4.5]deca-6,9-dien-4-yl)methyl)-2-fluoromalonate (22).** Yellow oil (35 mg, 50% yield);  $^{13}\text{C}$  NMR (101 MHz,  $\text{CDCl}_3$ )  $\delta$ : 185.0, 174.8, 166.9, 166.8 (d,  $J_{\text{C-F}} = 25.7$  Hz), 166.5 (d,  $J_{\text{C-F}} = 25.7$  Hz), 147.8, 147.7, 131.4, 93.7 (d,  $J_{\text{C-F}} = 207.0$  Hz), 54.0, 53.8, 53.7, 51.7 (d,  $J_{\text{C-F}} = 2.1$  Hz), 49.1, 37.0 (d,  $J_{\text{C-F}} = 19.4$  Hz), 30.3, 18.7 (d,  $J_{\text{C-F}} = 5.0$  Hz);  $^{19}\text{F}$  NMR (376 MHz,  $\text{CDCl}_3$ )  $\delta$ : -165.0; HRMS (ESI) ( $[\text{M}+\text{H}]^+$ ) Calcd. for  $\text{C}_{17}\text{H}_{21}\text{FNO}_6^+$ : 354.1347, Found: 354.1346.

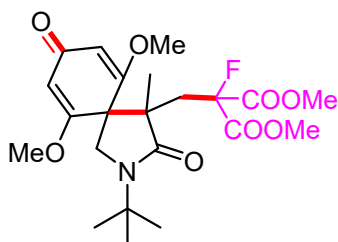

**Dimethyl 2-((2-(tert-butyl)-6,10-dimethoxy-4-methyl-3,8-dioxo-2-azaspiro[4.5]deca-6,9-dien-4-yl)methyl)-2-fluoromalonate (23).** Yellow oil (40 mg, 45% yield);  $^1\text{H}$  NMR (400 MHz, DMSO- $d_6$ )  $\delta$ : 5.50 (d,  $J = 10.3$  Hz, 2H), 3.74 (s, 6H), 3.70 (d,  $J = 17.7$  Hz, 2H), 3.65 (d,  $J = 4.4$  Hz, 6H), 2.07 (dd,  $J = 15.9, 6.3$  Hz, 1H), 1.32 (s, 9H), 0.99 (s, 3H);  $^{13}\text{C}$  NMR (101 MHz, DMSO- $d_6$ )  $\delta$ : 186.6, 174.2, 171.6, 170.8, 167.0 (d,  $J_{\text{C-F}} = 25.3$  Hz), 166.7 (d,  $J_{\text{C-F}} = 25.3$  Hz), 166.6, 103.4, 102.8, 93.7 (d,  $J_{\text{C-F}} = 205.3$  Hz), 56.4, 56.3, 54.4, 54.3, 54.0, 53.6, 52.5, 47.8, 37.2 (d,  $J_{\text{C-F}} = 19.4$  Hz), 27.4, 19.4 (d,  $J_{\text{C-F}} = 4.4$  Hz);  $^{19}\text{F}$  NMR (376 MHz, DMSO- $d_6$ )  $\delta$ : -164.0; HRMS (ESI) ( $[\text{M}+\text{H}]^+$ ) Calcd. for  $\text{C}_{22}\text{H}_{31}\text{FNO}_8^+$ : 456.2028, Found: 456.2027.

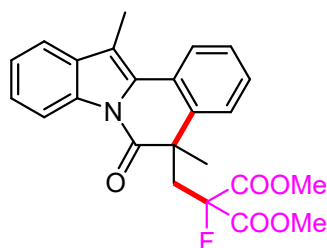

**Dimethyl 2-((5,12-dimethyl-6-oxo-5,6-dihydroindolo[2,1-*a*]isoquinolin-5-yl)methyl)-2-fluoromalonate (24).** Yellow solid (101.5 mg, 80% yield); m.p. = 143.2–144.1 °C;  $^1\text{H}$  NMR (400 MHz,  $\text{CDCl}_3$ )  $\delta$ : 8.60 (dd,  $J = 7.4, 2.2$  Hz, 1H), 8.04 (d,  $J = 7.5$  Hz, 1H), 7.58 (dd,  $J = 6.3, 1.7$  Hz, 1H), 7.42–7.32 (m, 5H), 3.68 (s, 3H), 3.53 (dd,  $J = 15.2, 7.8$  Hz, 1H), 3.34 (s, 3H), 3.11 (dd,  $J = 29.1, 15.2$  Hz, 1H), 2.66 (s, 3H), 1.74 (s, 3H);  $^{13}\text{C}$  NMR (101 MHz,  $\text{CDCl}_3$ )  $\delta$ : 171.8, 166.2 (d,  $J_{\text{C-F}} = 25.1$  Hz), 166.1 (d,  $J_{\text{C-F}} = 25.1$  Hz), 135.5, 134.5, 132.6, 129.6, 127.8, 127.7, 127.2, 127.0, 125.9, 125.2, 124.4, 118.6, 117.0, 114.9, 93.0 (d,  $J_{\text{C-F}} = 204.9$  Hz), 53.7, 53.3, 45.3 (d,  $J_{\text{C-F}} = 2.6$  Hz), 44.4 (d,  $J_{\text{C-F}} = 18.9$  Hz), 31.4, 11.8;  $^{19}\text{F}$  NMR (377 MHz,  $\text{CDCl}_3$ )  $\delta$ : -167.0 (dd,  $J = 29.1, 8.2$  Hz); HRMS (ESI) ( $[\text{M}+\text{H}]^+$ ) Calcd. for  $\text{C}_{24}\text{H}_{23}\text{FNO}_5^+$ : 424.1555, Found: 424.1555.

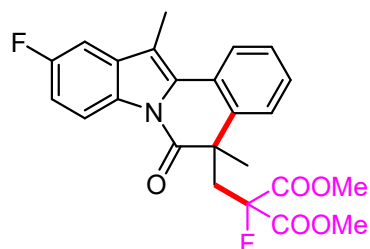



**Dimethyl 2-fluoro-2-((10-fluoro-5,12-dimethyl-6-oxo-5,6-dihydroindolo[2,1-*a*]-isoquinolin-5-yl)methyl)malonate (25).** White solid (35.7 mg, 27% yield); m.p. = 166.7–177.7 °C; <sup>1</sup>H NMR (400 MHz, CDCl<sub>3</sub>) δ: 8.34 (dd, *J* = 10.1, 2.4 Hz, 1H), 8.00 (t, *J* = 7.8 Hz, 1H), 7.49 (dd, *J* = 8.6, 5.5 Hz, 1H), 7.42–7.38 (m, 2H), 7.32 (t, *J* = 7.5 Hz, 1H), 7.09 (td, *J* = 8.6, 2.4 Hz, 1H), 3.71 (s, 3H), 3.51 (dd, *J* = 15.2, 7.1 Hz, 1H), 3.34 (s, 3H), 3.12 (dd, *J* = 29.8, 15.2 Hz, 1H), 2.64 (s, 3H), 1.74 (s, 3H); <sup>13</sup>C NMR (101 MHz, CDCl<sub>3</sub>) δ: 171.9, 166.1 (d, *J*<sub>C-F</sub> = 25.1 Hz), 166.0 (d, *J*<sub>C-F</sub> = 25.1 Hz), 161.8 (d, *J*<sub>C-F</sub> = 241.5 Hz), 135.2, 134.5 (d, *J*<sub>C-F</sub> = 13.1 Hz), 129.9 (d, *J*<sub>C-F</sub> = 4.3 Hz), 128.9, 127.8 (d, *J*<sub>C-F</sub> = 2.9 Hz), 127.2, 126.9, 124.9, 119.2 (d, *J*<sub>C-F</sub> = 9.7 Hz), 114.5, 112.4 (d, *J*<sub>C-F</sub> = 24.2 Hz), 104.5 (d, *J*<sub>C-F</sub> = 28.6 Hz), 93.0 (d, *J*<sub>C-F</sub> = 204.2 Hz), 53.8, 53.3, 45.2 (d, *J*<sub>C-F</sub> = 2.8 Hz), 44.5 (d, *J*<sub>C-F</sub> = 18.9 Hz), 31.3, 11.8; <sup>19</sup>F NMR (377 MHz, CDCl<sub>3</sub>) δ: -115.8, -166.9; HRMS (ESI) ([M+H]<sup>+</sup>) Calcd. for C<sub>24</sub>H<sub>22</sub>F<sub>2</sub>NO<sub>5</sub><sup>+</sup>: 442.1461, Found: 442.1461.

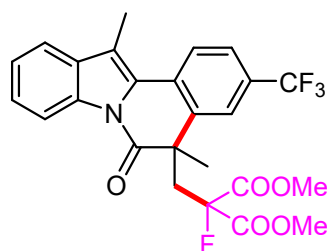

**Dimethyl 2-((5,12-dimethyl-6-oxo-3-(trifluoromethyl)-5,6-dihydroindolo[2,1-*a*]-isoquinolin-5-yl)methyl)-2-fluoromalonate (26).** White solid (82.5 mg, 56% yield); m.p. = 144.6–145.8 °C; <sup>1</sup>H NMR (400 MHz, CDCl<sub>3</sub>) δ: 8.60 (d, *J* = 7.5 Hz, 1H), 8.15 (d, *J* = 8.4 Hz, 1H), 7.68–7.59 (m, 3H), 7.44–7.36 (m, 2H), 3.69 (s, 3H), 3.58 (dd, *J* = 15.4, 7.8 Hz, 1H), 3.38 (s, 3H), 3.12 (ddd, *J* = 28.2, 15.4, 1.1 Hz, 1H), 2.69 (s, 3H), 1.77 (s, 3H); <sup>13</sup>C NMR (101 MHz, CDCl<sub>3</sub>) δ 170.9, 165.9 (d, *J*<sub>C-F</sub> = 24.6 Hz), 165.8 (d, *J*<sub>C-F</sub> = 26.2 Hz), 136.2, 134.7, 132.2, 130.3, 128.8 (d, *J*<sub>C-F</sub> = 32.7 Hz), 128.3, 126.7, 125.5, 124.7, 124.6 (q, *J*<sub>C-F</sub> = 3.9 Hz), 124.5, 124.0 (d, *J*<sub>C-F</sub> = 271.9 Hz), 119.0, 117.3, 117.1, 92.7 (d, *J*<sub>C-F</sub> = 203.3 Hz), 53.8, 53.3, 45.4 (d, *J*<sub>C-F</sub> = 2.9 Hz), 44.2 (d, *J*<sub>C-F</sub> = 18.8 Hz), 31.3, 11.9; <sup>19</sup>F NMR (377 MHz, CDCl<sub>3</sub>) δ: -62.4, -166.5 (dd, *J* = 28.2, 7.8 Hz); HRMS (ESI) ([M+H]<sup>+</sup>) Calcd. for C<sub>25</sub>H<sub>22</sub>F<sub>4</sub>NO<sub>5</sub><sup>+</sup>: 492.1429, Found: 492.1426.

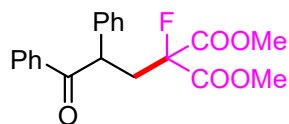

**Dimethyl 2-fluoro-2-(3-oxo-2,3-diphenylpropyl)malonate (28).** Yellow oil (46 mg, 43% yield);  $^1\text{H}$  NMR (400 MHz,  $\text{CDCl}_3$ )  $\delta$ : 7.96–7.91 (m, 2H), 7.50–7.45 (m, 1H), 7.40–7.35 (m, 2H), 7.32–7.25 (m, 4H), 7.22–7.17 (m, 1H), 4.93 (dd,  $J = 7.2, 5.8$  Hz, 1H), 3.76 (s, 3H), 3.54 (s, 3H), 3.27 (ddd,  $J = 18.8, 15.2, 7.2$  Hz, 1H), 2.74 (ddd,  $J = 24.0, 15.2, 5.8$  Hz, 1H);  $^{13}\text{C}$  NMR (101 MHz,  $\text{CDCl}_3$ )  $\delta$ : 198.0, 166.5 (d,  $J_{\text{C-F}} = 25.8$  Hz), 166.3 (d,  $J_{\text{C-F}} = 25.8$  Hz), 137.9, 136.0, 133.3, 129.2, 128.9, 128.8, 128.7, 127.7, 93.4 (d,  $J_{\text{C-F}} = 198.0$  Hz), 53.6, 53.3, 47.7 (d,  $J_{\text{C-F}} = 3.3$  Hz), 37.6 (d,  $J_{\text{C-F}} = 20.6$  Hz);  $^{19}\text{F}$  NMR (377 MHz,  $\text{CDCl}_3$ )  $\delta$ : -165.1 (dd,  $J = 24.0, 18.8$  Hz); HRMS (ESI) ( $[\text{M}+\text{H}]^+$ ) Calcd. for  $\text{C}_{20}\text{H}_{20}\text{FNO}_5^+$ : 359.1289, Found: 359.1287.

**Methyl 3-(1,3-dimethyl-2-oxoindolin-3-yl)-2-fluoropropanoate (29)**

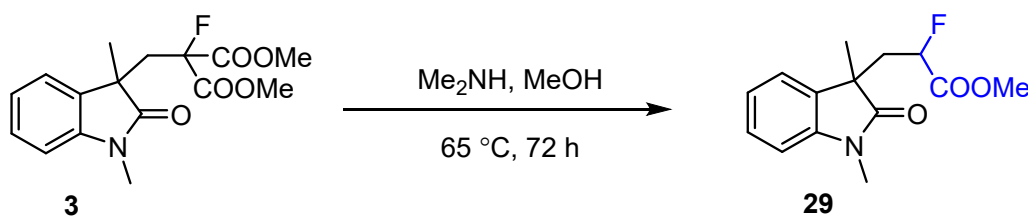

**Methyl 3-(1,3-dimethyl-2-oxoindolin-3-yl)-2-fluoropropanoate (29).** To a solution of **3** (0.20 mmol) in MeOH (2 mL) was added dimethylamine (2 mmol). The reaction mixture was stirred at 65 °C for 72 h. The solvent was evaporated under reduced pressure and the residue was chromatographed through silica gel eluting with ethyl acetate/petroleum ether to give the desired product as a yellow oil (**29**, 26 mg, 50% yield).  $^1\text{H}$  NMR (400 MHz,  $\text{CDCl}_3$ )  $\delta$ : 7.31–7.27 (m, 1H), 7.20 (dd,  $J = 7.5, 1.4$  Hz, 1H), 7.08 (dd,  $J = 7.5, 1.0$  Hz, 1H), 6.87 (d,  $J = 7.8$  Hz, 1H), 4.88–4.73 (m, 1H), 3.60 (s, 3H), 3.24 (s, 3H), 2.63–2.53 (m, 1H), 2.53–2.42 (m, 1H), 1.41 (s, 3H);  $^{13}\text{C}$  NMR (101 MHz,  $\text{CDCl}_3$ )  $\delta$ : 179.6, 169.7 (d,  $J_{\text{C-F}} = 23.5$  Hz), 143.4, 132.1, 128.5, 123.6, 122.6, 108.5, 86.9 (d,  $J_{\text{C-F}} = 187.1$  Hz), 52.6, 46.2, 39.5 (d,  $J_{\text{C-F}} = 19.8$  Hz), 26.5, 25.1;  $^{19}\text{F}$  NMR (377 MHz,  $\text{CDCl}_3$ )  $\delta$ : -190.8; HRMS (ESI) ( $[\text{M}+\text{H}]^+$ ) Calcd. for  $\text{C}_{14}\text{H}_{17}\text{FNO}_3^+$ : 266.1187, Found: 266.1187.

### *N*<sup>1</sup>,*N*<sup>3</sup>-Dibutyl-2-((1,3-dimethyl-2-oxoindolin-3-yl)methyl)-2-fluoromalonamide (**30**)

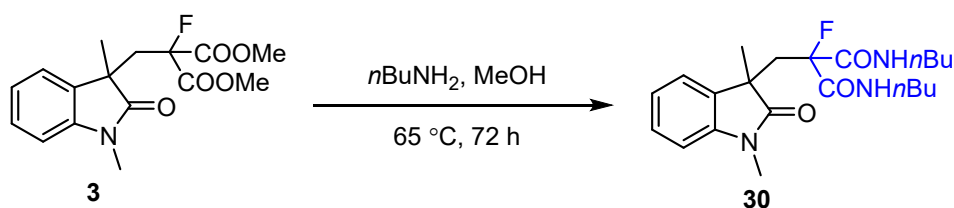

*N*<sup>1</sup>,*N*<sup>3</sup>-Dibutyl-2-((1,3-dimethyl-2-oxoindolin-3-yl)methyl)-2-fluoromalonamide (**30**). To a solution of **3** (0.20 mmol) in MeOH (2 mL) was added butan-1-amine (2 mmol). The reaction mixture was stirred at 50 °C for 42 h. The solvent was evaporated under reduced pressure and the residue was chromatographed through silica gel eluting with ethyl acetate/petroleum ether to give the desired product as a yellow oil (**30**, 66 mg, 34% yield). <sup>1</sup>H NMR (400 MHz, CDCl<sub>3</sub>) δ: 7.28–7.21 (m, 2H), 7.02 (tt, *J* = 7.5, 0.9 Hz, 1H), 6.83 (d, *J* = 7.7 Hz, 1H), 6.56 (t, *J* = 6.0 Hz, 1H), 6.02 (q, *J* = 5.0 Hz, 1H), 3.26–3.18 (m, 4H), 3.16–3.08 (m, 1H), 3.04–2.91 (m, 2H), 2.80 (ddd, *J* = 14.9, 8.5, 0.9 Hz, 1H), 2.66–2.58 (m, 1H), 2.24–2.11 (m, 1H), 1.47–1.39 (m, 2H), 1.34 (s, 3H), 1.28 (dt, *J* = 7.7, 6.1 Hz, 2H), 1.22–1.16 (m, 3H), 0.93–0.83 (m, 6H); <sup>13</sup>C NMR (101 MHz, CDCl<sub>3</sub>) δ: 179.7, 166.8 (d, *J*<sub>C-F</sub> = 22.2 Hz), 166.2 (d, *J*<sub>C-F</sub> = 22.7 Hz), 143.6, 130.7, 128.3, 125.0, 122.0, 107.9, 95.6 (d, *J*<sub>C-F</sub> = 200.8 Hz), 45.8 (d, *J*<sub>C-F</sub> = 2.0 Hz), 42.2 (d, *J*<sub>C-F</sub> = 20.3 Hz), 39.5, 39.4, 31.2, 30.9, 26.5, 26.2, 20.0 (2C), 13.8 (2C); <sup>19</sup>F NMR (377 MHz, CDCl<sub>3</sub>) δ: -171.4. HRMS (ESI) ([*M*+*H*]<sup>+</sup>) Calcd. for C<sub>22</sub>H<sub>33</sub>FN<sub>3</sub>O<sub>3</sub><sup>+</sup>: 406.2500, Found: 406.2501.

## 6. Synthesis and Characterization of Unknown Substrates

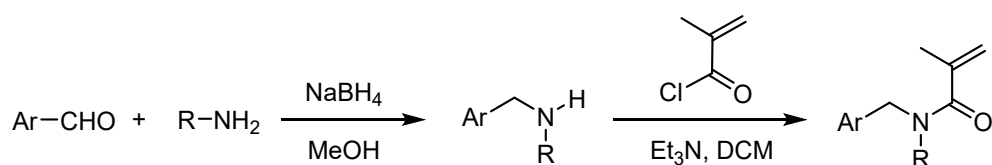

**Step 1:** To a solution of ArCHO (3.0 mmol) and RNH<sub>2</sub> (3.0 mmol) in MeOH (15 mL) was added NaBH<sub>4</sub> (3.6 mmol). The reaction mixture was stirred at rt for 6 h. The solvent was evaporated under reduced pressure and extracted with EtOAc. The organic layer was dried over Na<sub>2</sub>SO<sub>4</sub>, and concentrated to afford the crude product. The crude product was directly used in the next step without purification.

**Step 2:** To a solution of above crude product and Et<sub>3</sub>N (6.0 mmol) in DCM (15 mL) was added methacryloyl chloride (3.6 mmol). The reaction mixture was stirred at rt for 12 h. The solvent was evaporated under reduced pressure and the residue was chromatographed through silica gel eluting with ethyl acetate/petroleum ether to give the desired product.

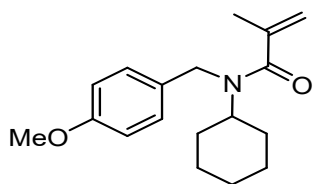

***N*-Cyclohexyl-*N*-(4-methoxybenzyl)methacrylamide (S1).** Yellow oil (54% yield); <sup>1</sup>H NMR (400 MHz, CDCl<sub>3</sub>) δ: 7.16 (d, *J* = 8.2 Hz, 2H), 6.83 (d, *J* = 8.2 Hz, 2H), 5.29 (s, 1H), 5.09 (d, *J* = 27.2 Hz, 2H), 4.51 (s, 2H), 3.78 (s, 3H), 2.13–1.87 (m, 3H), 1.76–1.61 (m, 5H), 1.47–1.37 (m, 2H), 1.31–1.18 (m, 2H), 1.08–0.96 (m, 1H); <sup>13</sup>C NMR (101 MHz, CDCl<sub>3</sub>) δ: 173.3, 158.4, 141.8, 131.6, 128.2, 114.0, 113.8, 58.9, 55.3, 53.5, 43.4, 32.3, 26.0, 25.3, 20.9; HRMS (ESI) ([M+H]<sup>+</sup>) Calcd. for C<sub>18</sub>H<sub>26</sub>NO<sub>2</sub><sup>+</sup>: 288.1958, Found:288.1955.

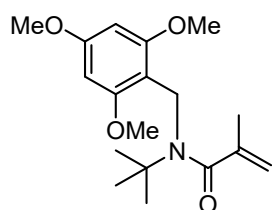

***N*-(*tert*-Butyl)-*N*-(2,4,6-trimethoxybenzyl)methacrylamide (S2).** White solid (70% yield); m.p. = 126.9–127.6 °C; <sup>1</sup>H NMR (400 MHz, CDCl<sub>3</sub>) δ: 6.09 (s, 2H), 5.14–5.06 (m, 3H), 4.71 (s, 2H), 3.81 (s, 4H), 3.78 (s, 7H), 1.99 (t, *J* = 1.3 Hz, 3H), 1.27 (s, 10H); <sup>13</sup>C NMR (101 MHz, CDCl<sub>3</sub>) δ: 176.2, 160.7, 159.4, 144.6, 115.2, 107.7, 90.6, 56.4, 55.5, 55.4, 41.9, 28.4, 19.9; HRMS (ESI) ([*M*+*H*]<sup>+</sup>) Calcd. for C<sub>18</sub>H<sub>28</sub>NO<sub>4</sub><sup>+</sup>: 322.2013, Found: 322.2007.

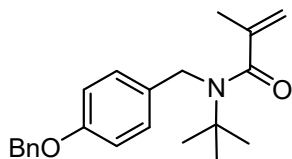

***N*-(4-(Benzyloxy)benzyl)-*N*-(*tert*-butyl)methacrylamide (S3).** White solid (85% yield); m.p. = 77.4–78.2 °C; <sup>1</sup>H NMR (400 MHz, CDCl<sub>3</sub>) δ: 7.45–7.32 (m, 5H), 7.13 (d, *J* = 8.5 Hz, 2H), 6.97–6.93 (m, 2H), 5.05 (s, 2H), 5.02 (s, 1H), 4.94–4.93 (m, *J* = 1.5 Hz, 1H), 4.61 (s, 2H), 1.93 (s, 2H), 1.42 (s, 9H); <sup>13</sup>C NMR (101 MHz, CDCl<sub>3</sub>) δ: 174.8, 158.0, 143.3, 137.1, 132.5, 128.8, 128.2, 127.7, 127.4, 115.0, 113.5, 70.3, 57.7, 50.4, 28.8, 21.0; HRMS (ESI) ([*M*+*H*]<sup>+</sup>) Calcd. for C<sub>18</sub>H<sub>26</sub>NO<sub>2</sub><sup>+</sup>: 338.2115, Found: 338.2113.

## 7. NMR Spectra for Products

### Compound 3

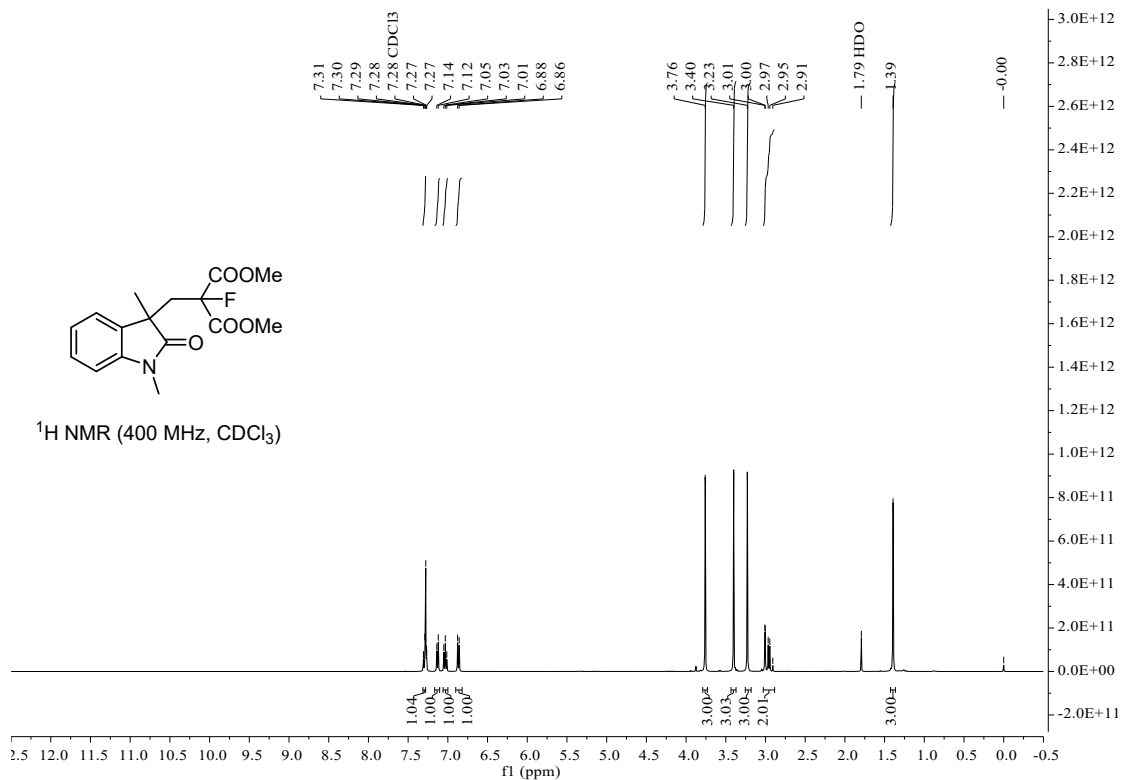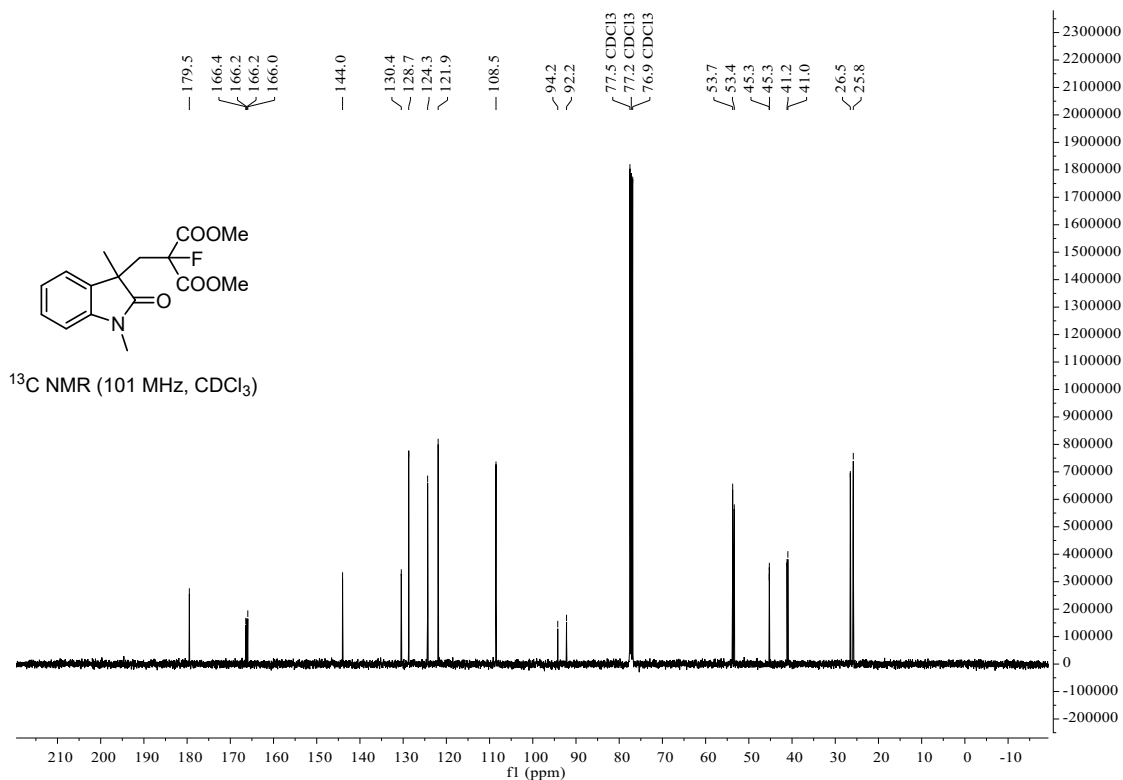

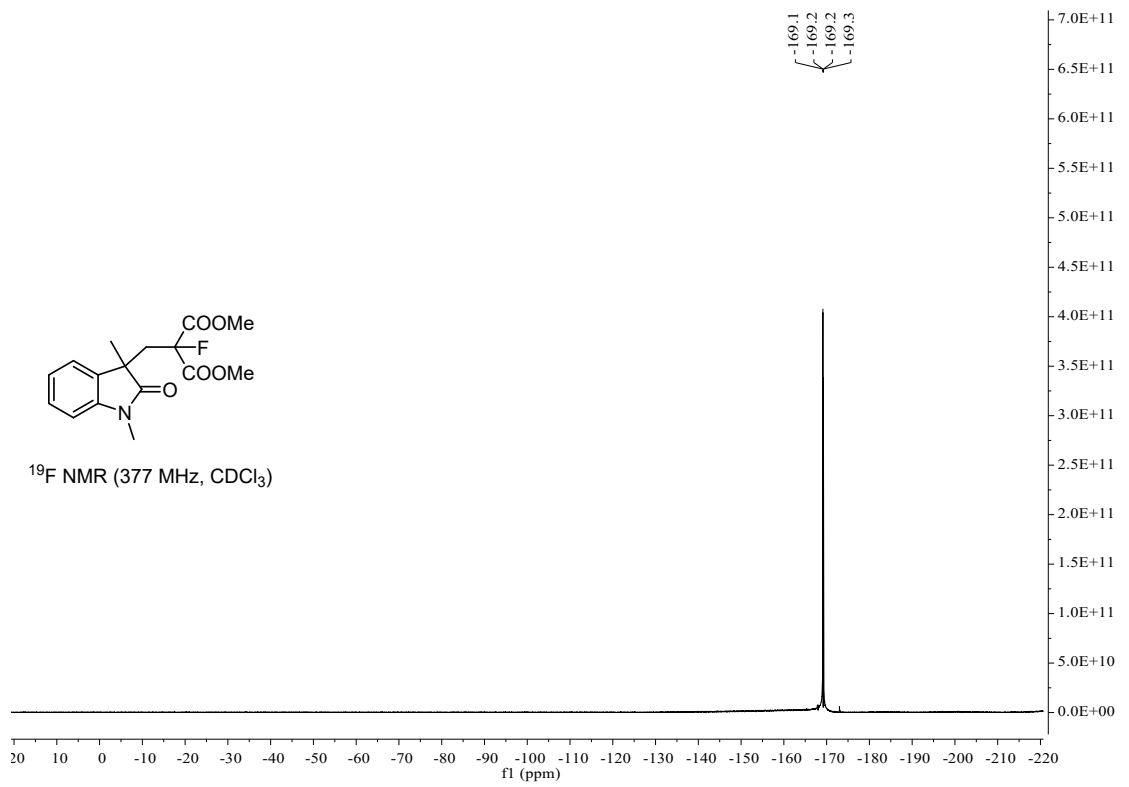

# Compound 4

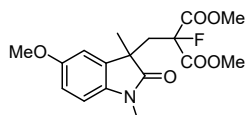

<sup>1</sup>H NMR (400 MHz, CDCl<sub>3</sub>)

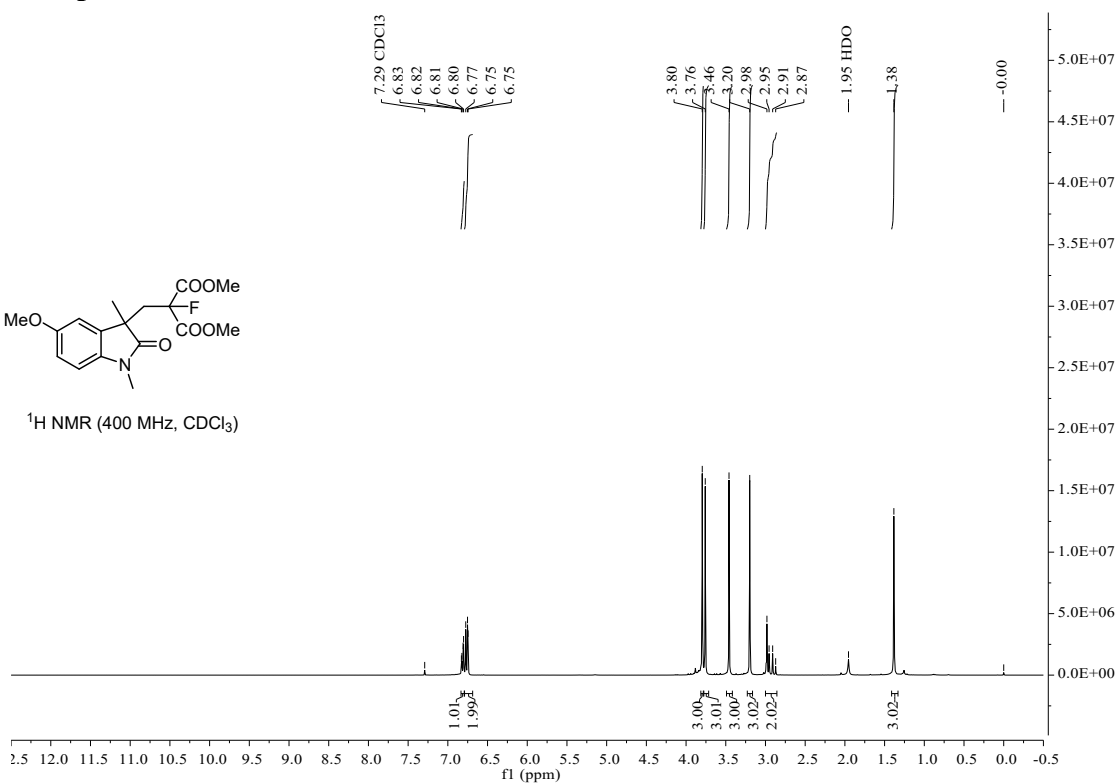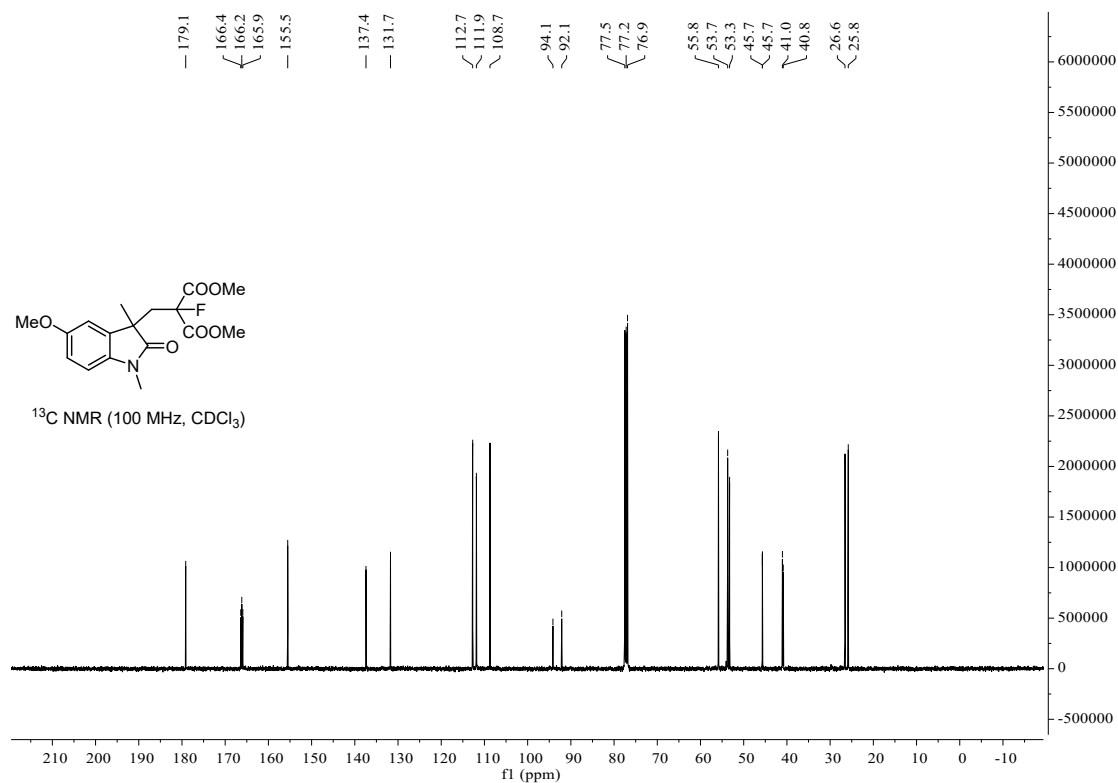



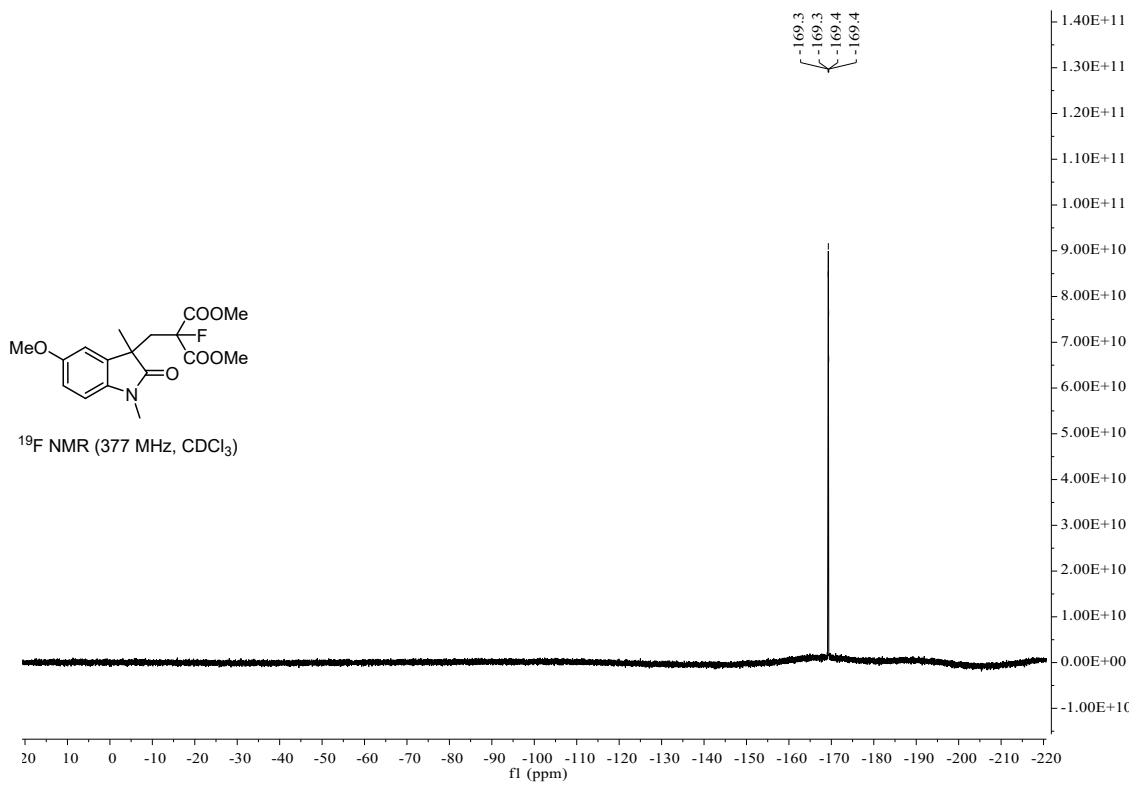

# Compound 5

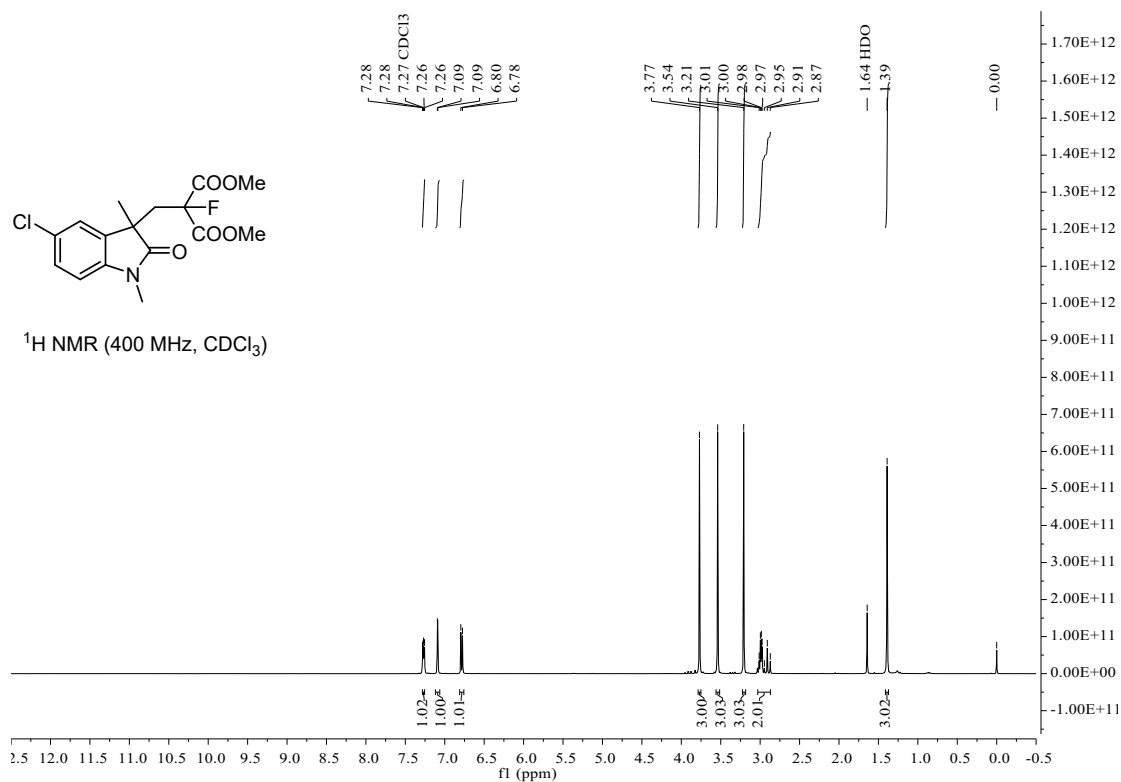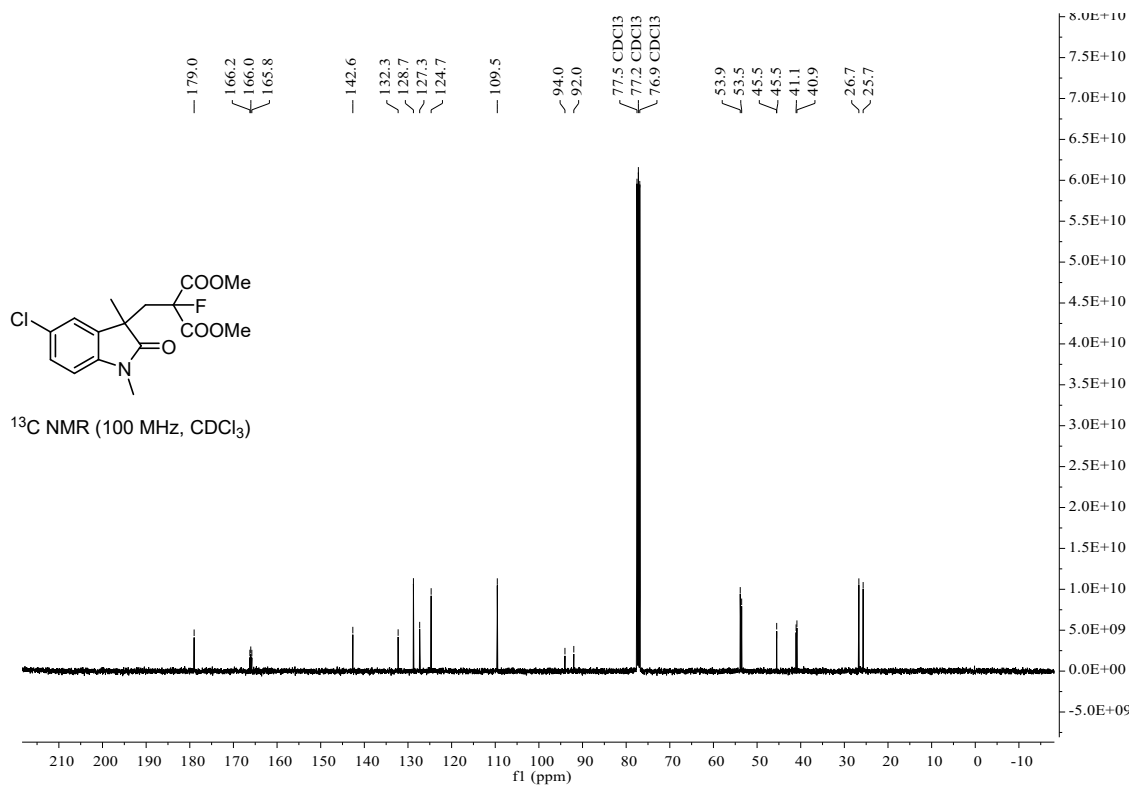

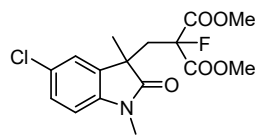

$^{19}\text{F}$  NMR (377 MHz,  $\text{CDCl}_3$ )

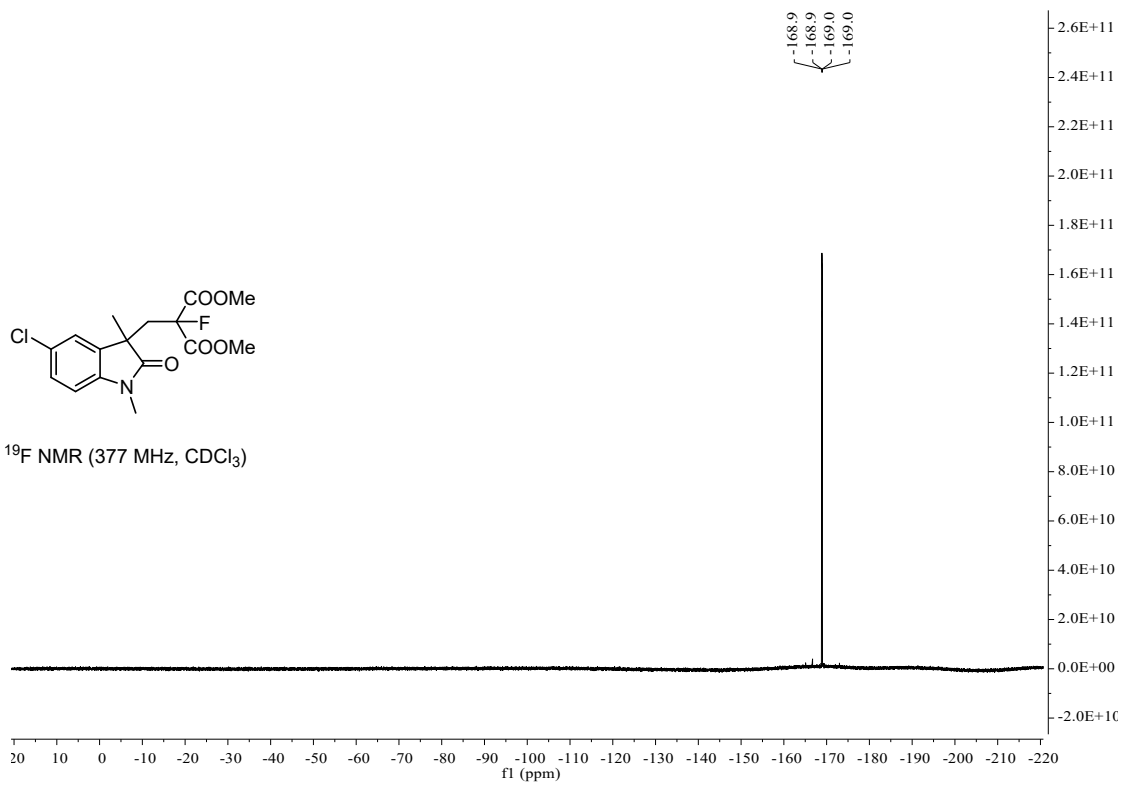

# Compound 6

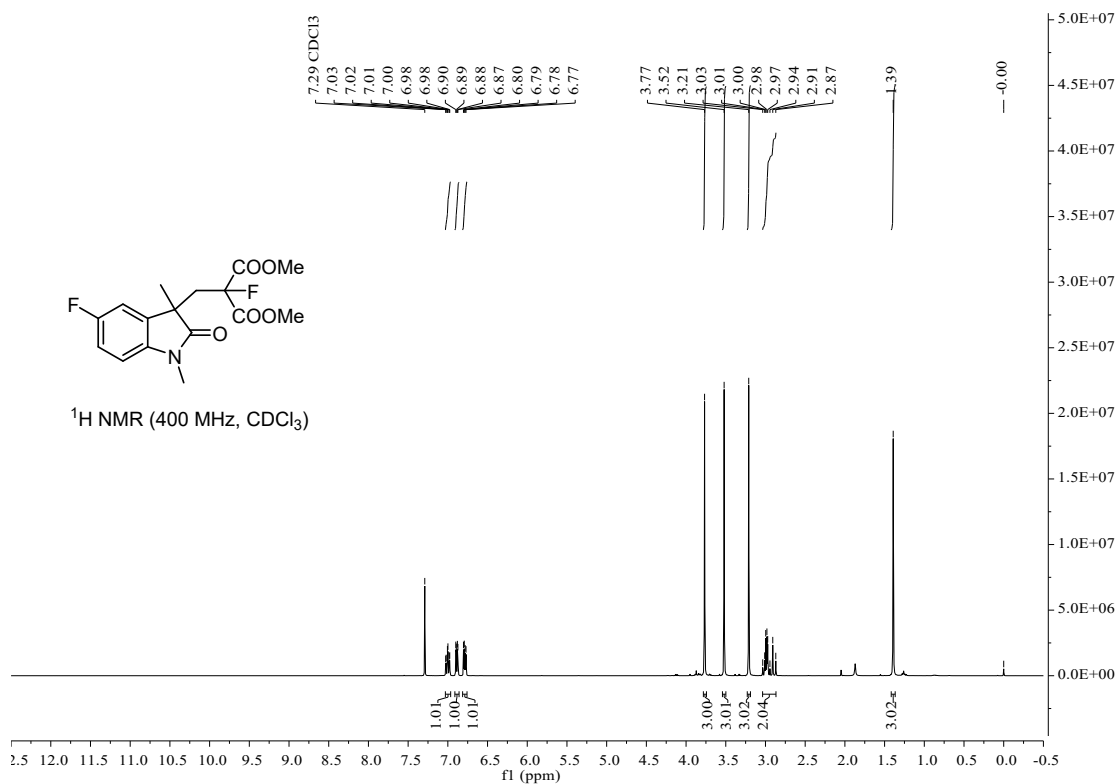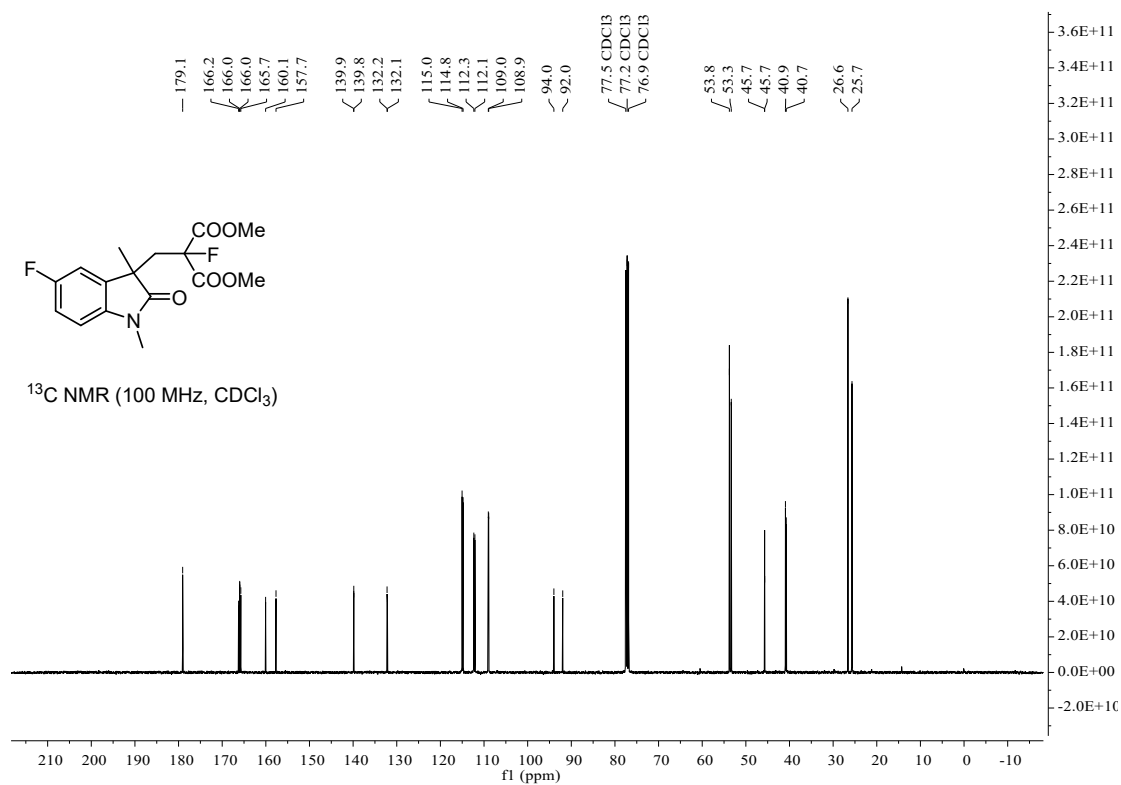

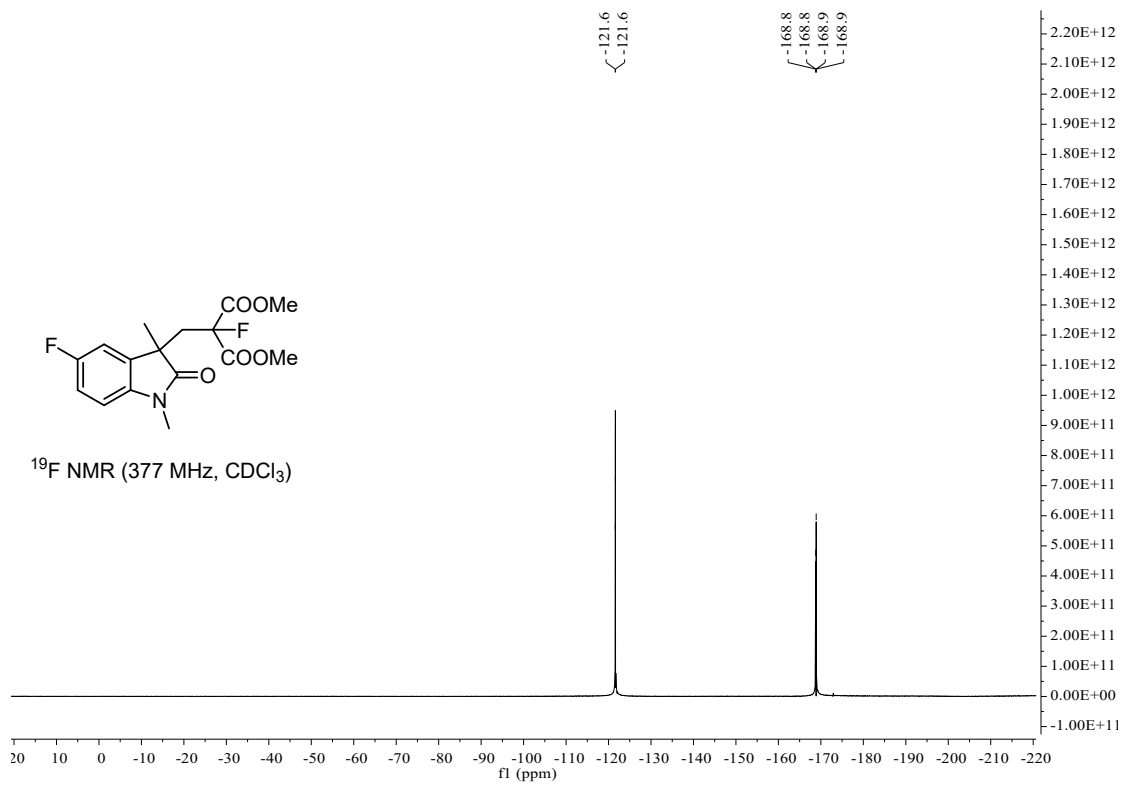

# Compound 7

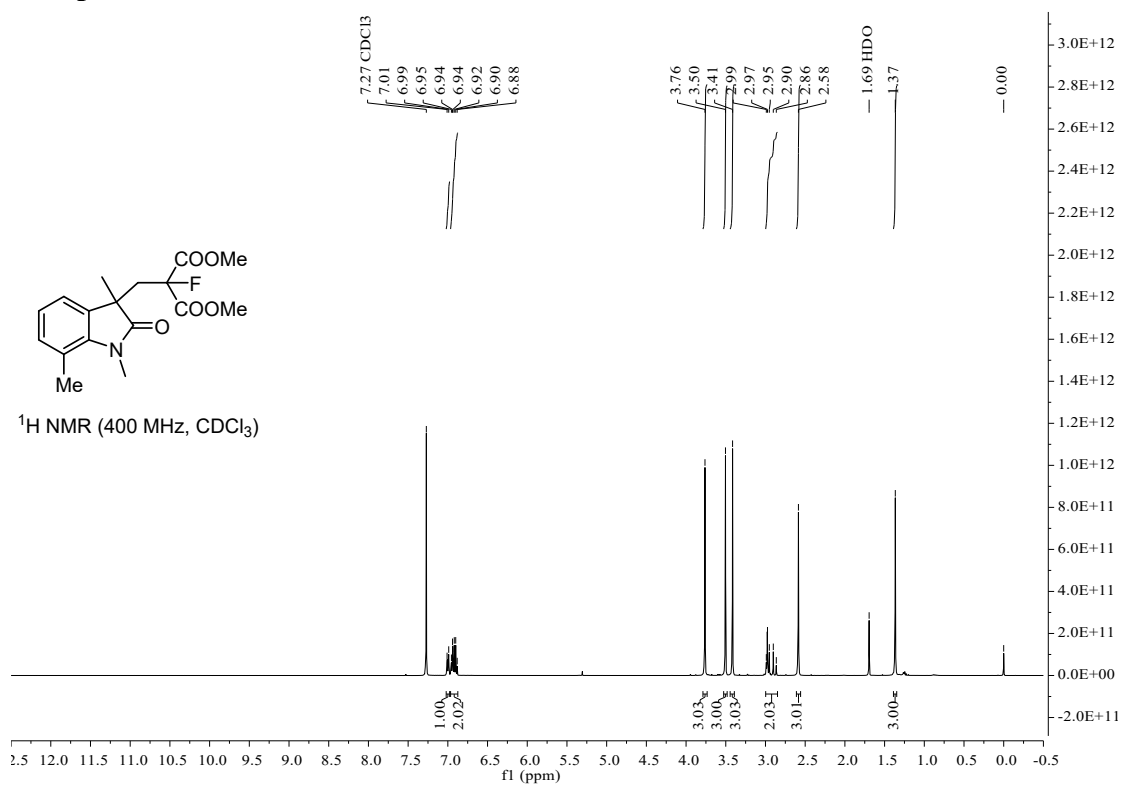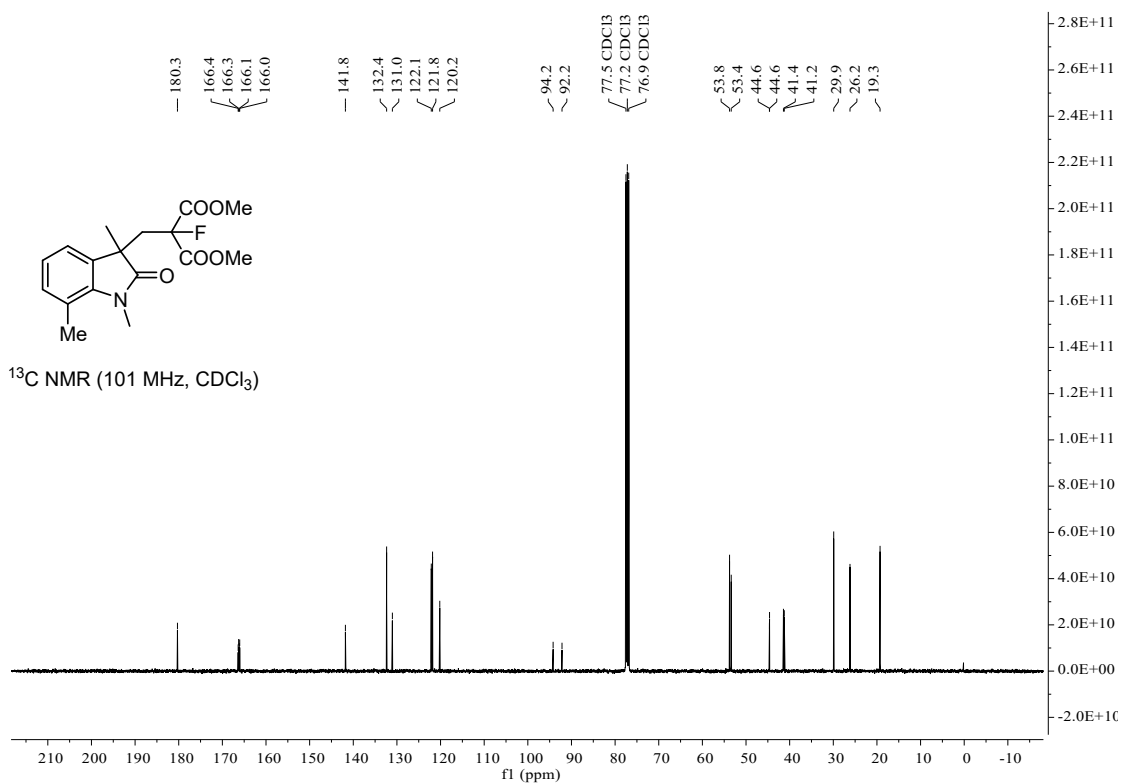

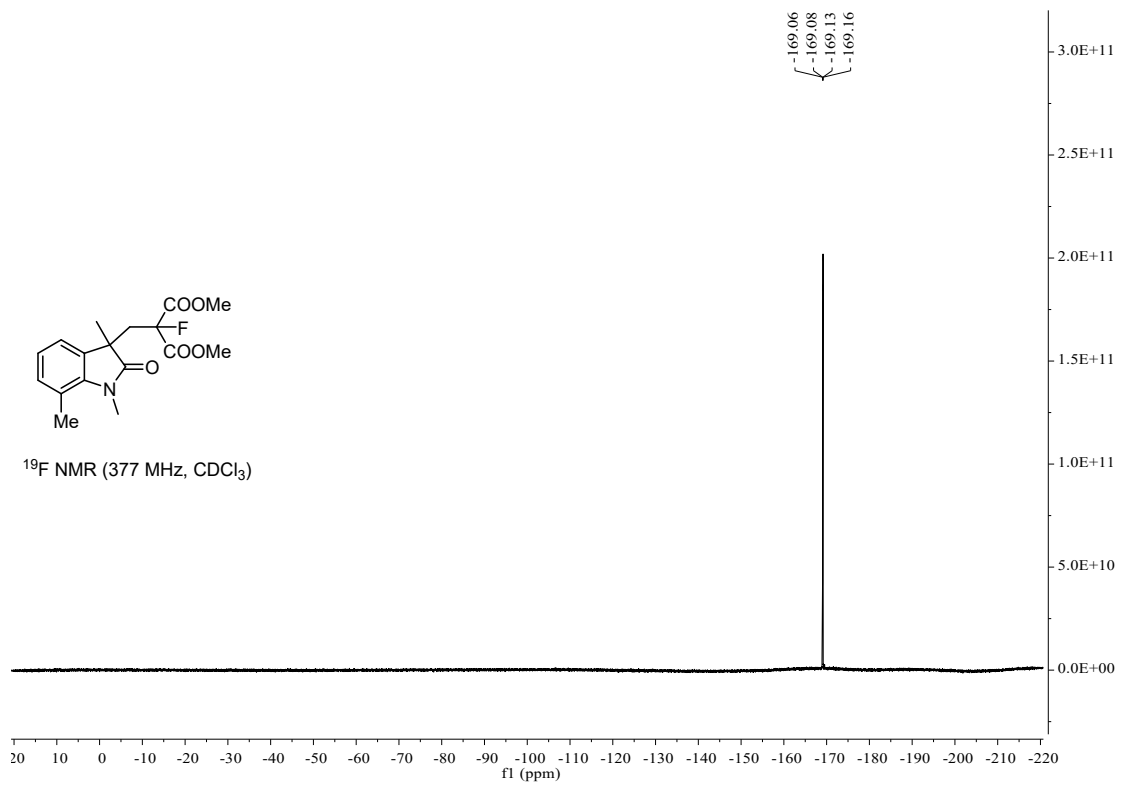

# Compound 8

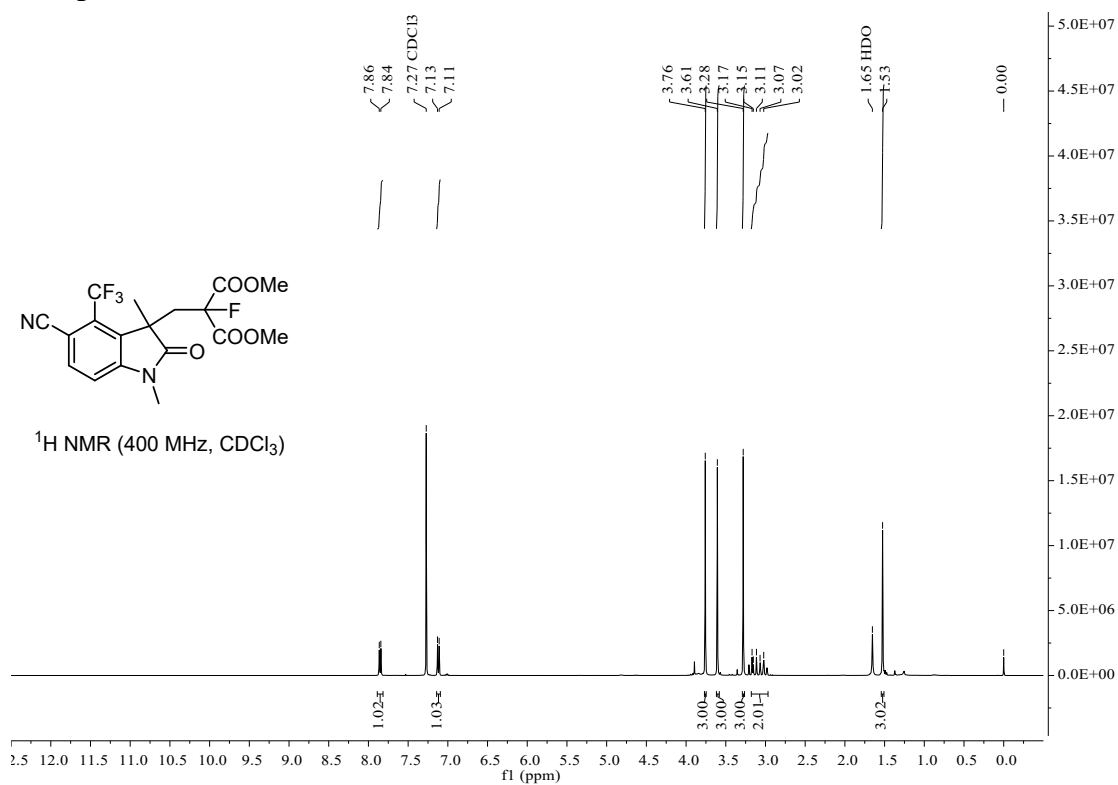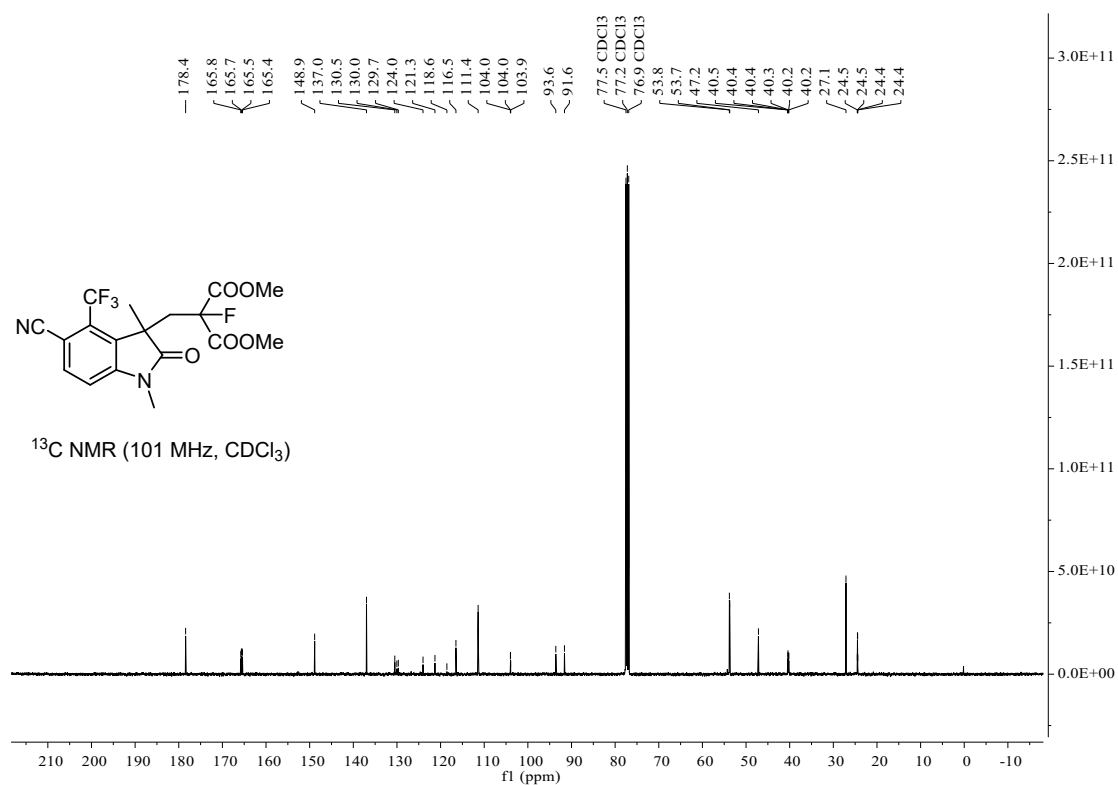



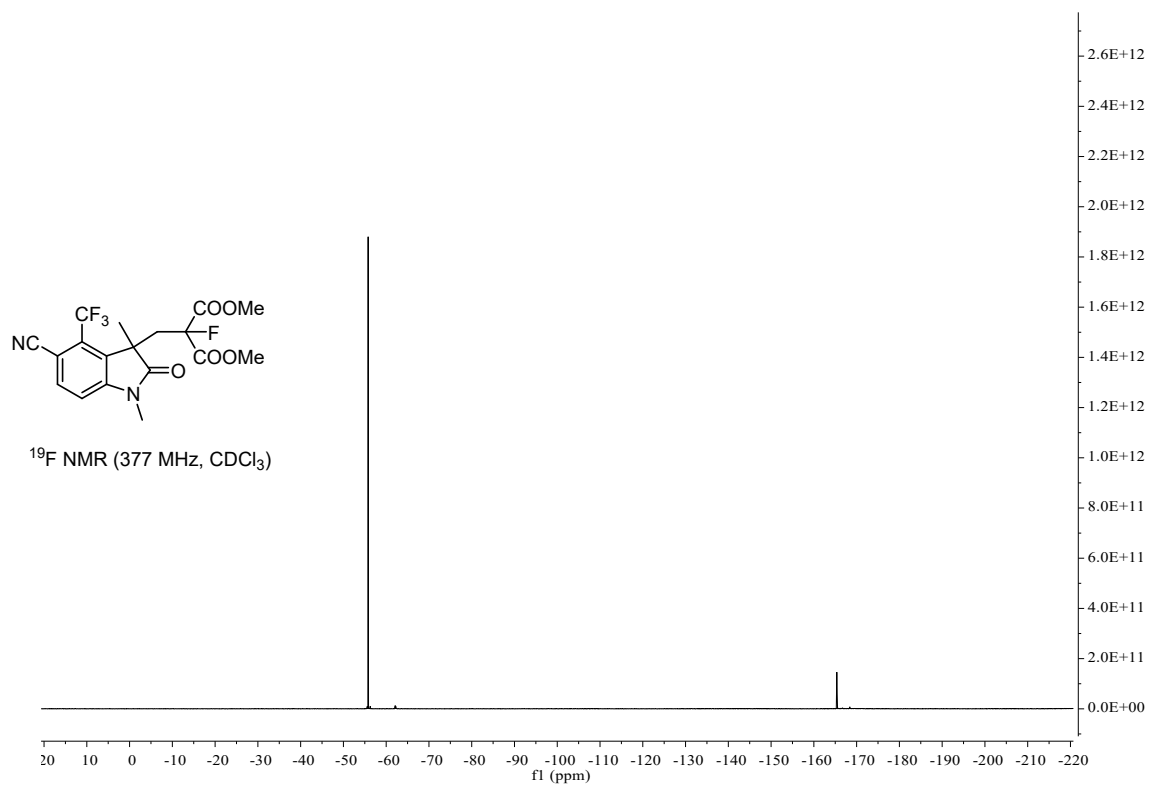

# Compound 9

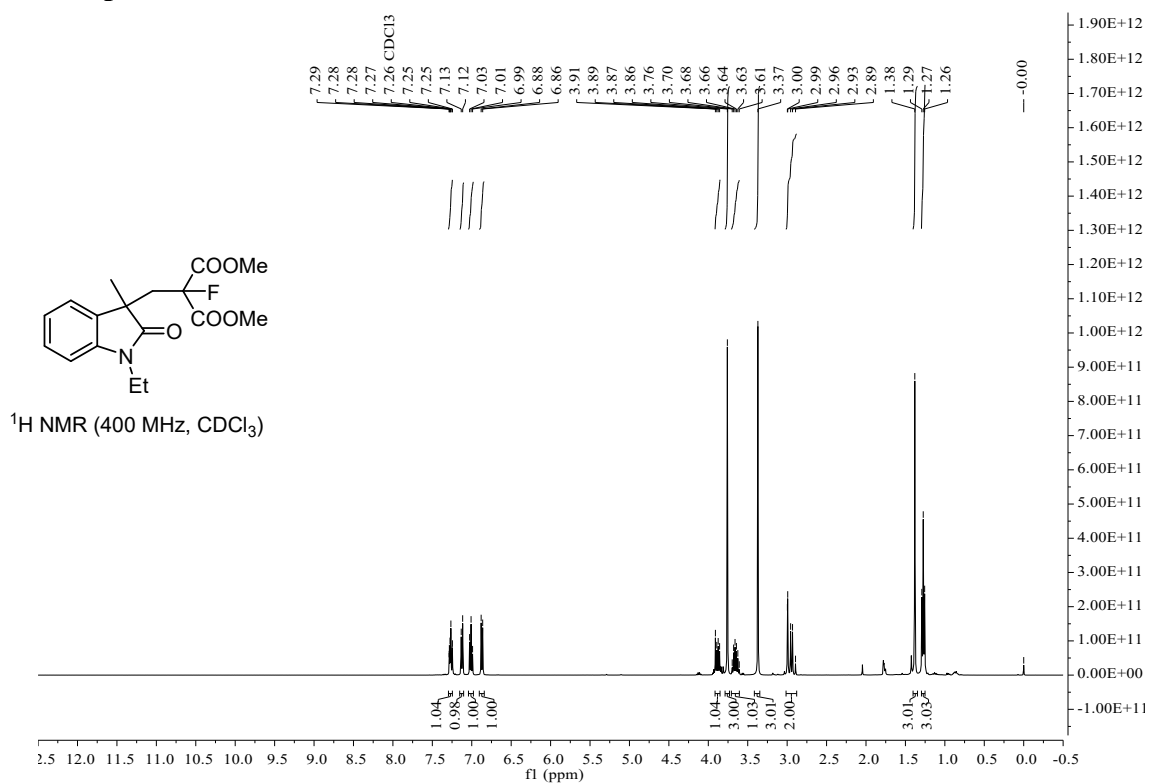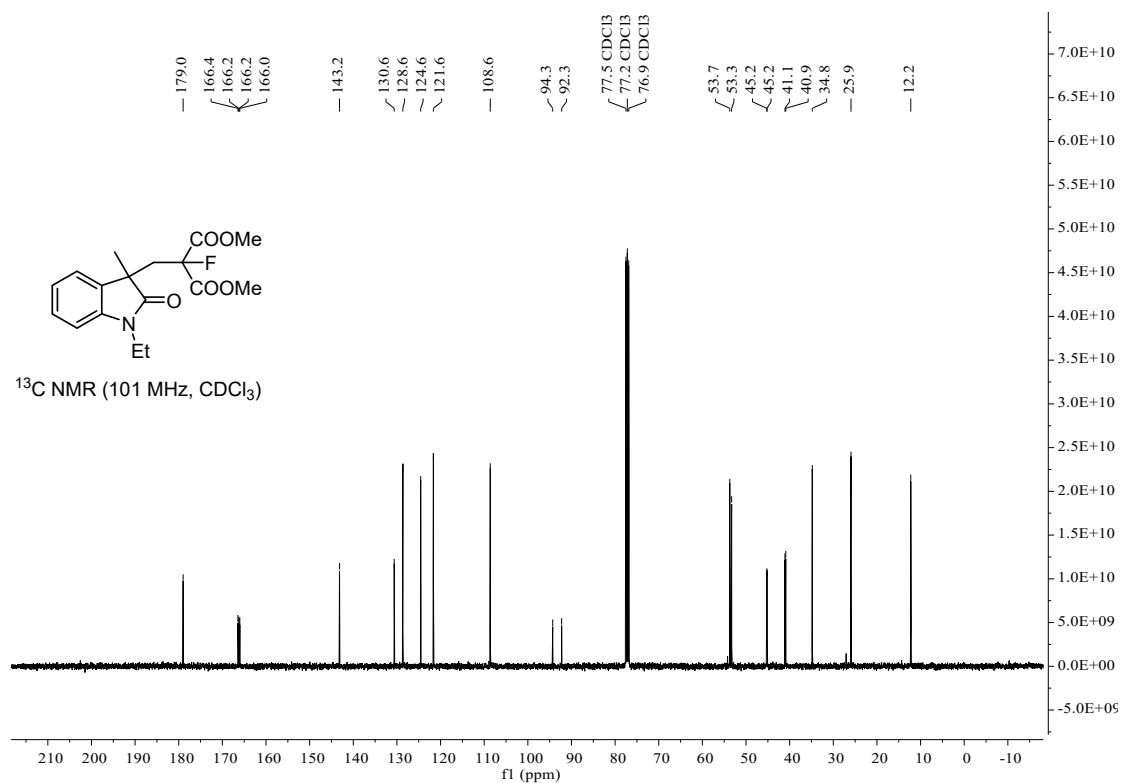

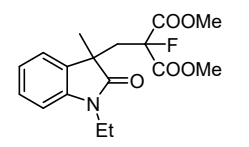

$^{19}\text{F}$  NMR (377 MHz,  $\text{CDCl}_3$ )

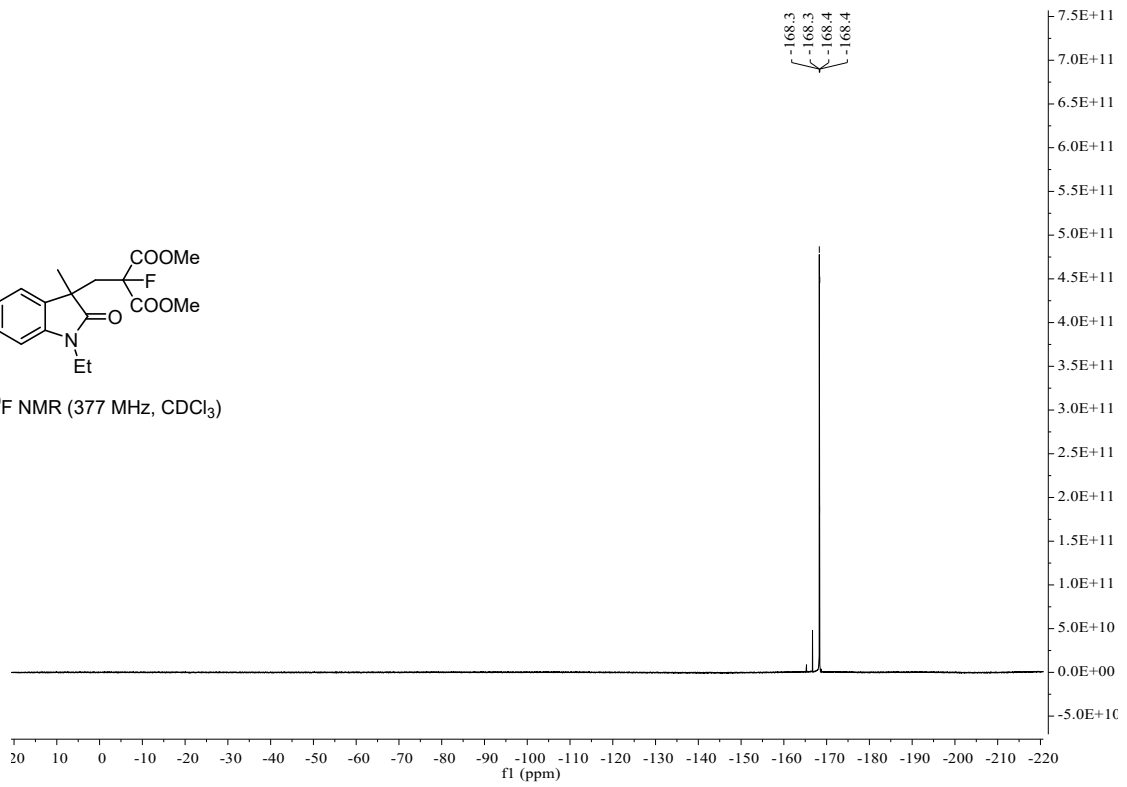

# Compound 10

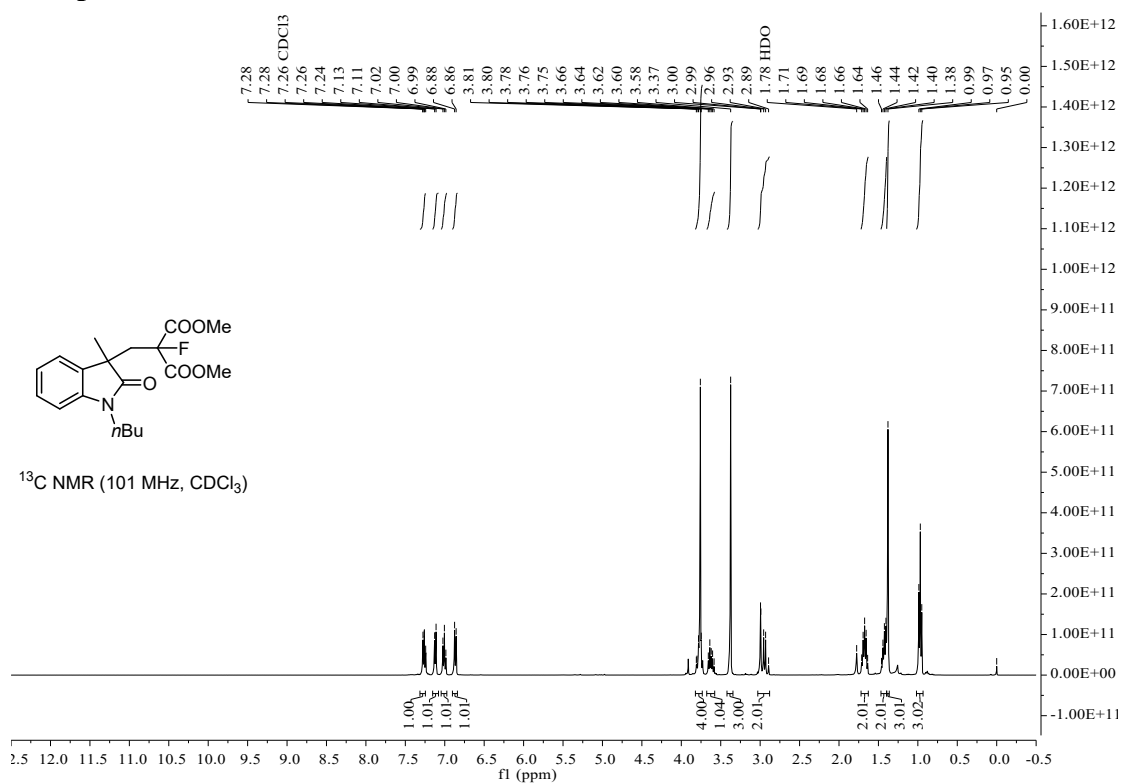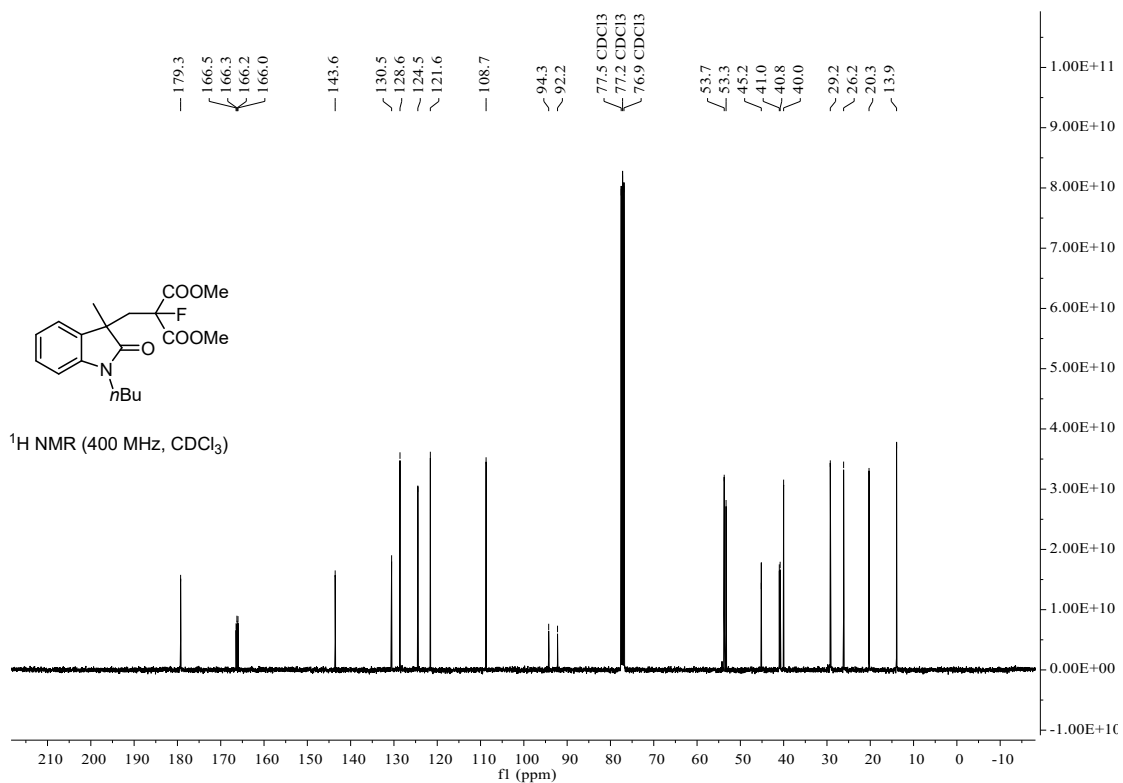

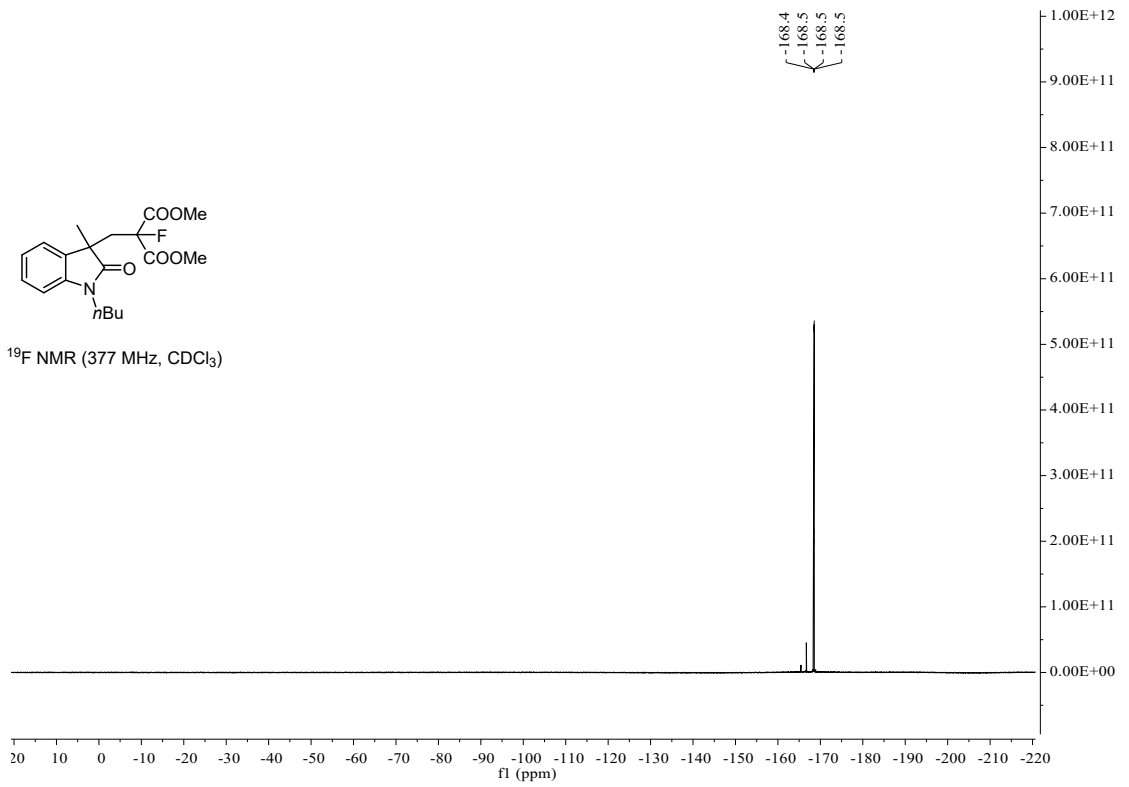

# Compound 11

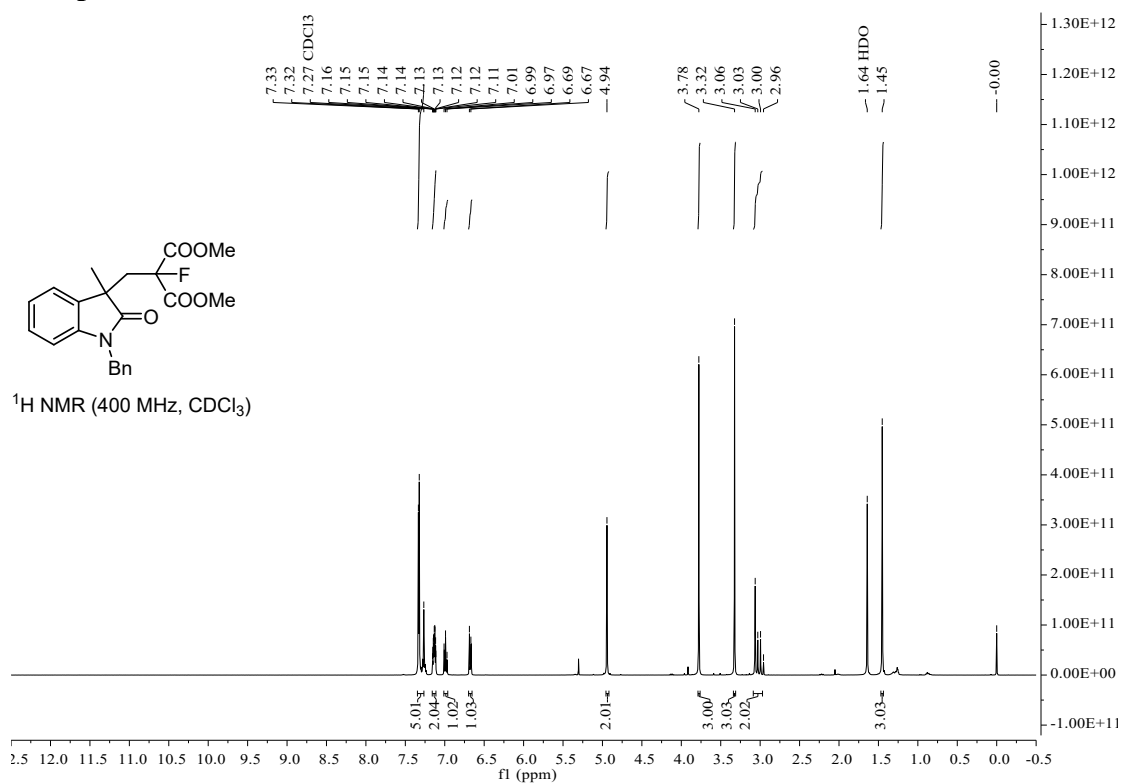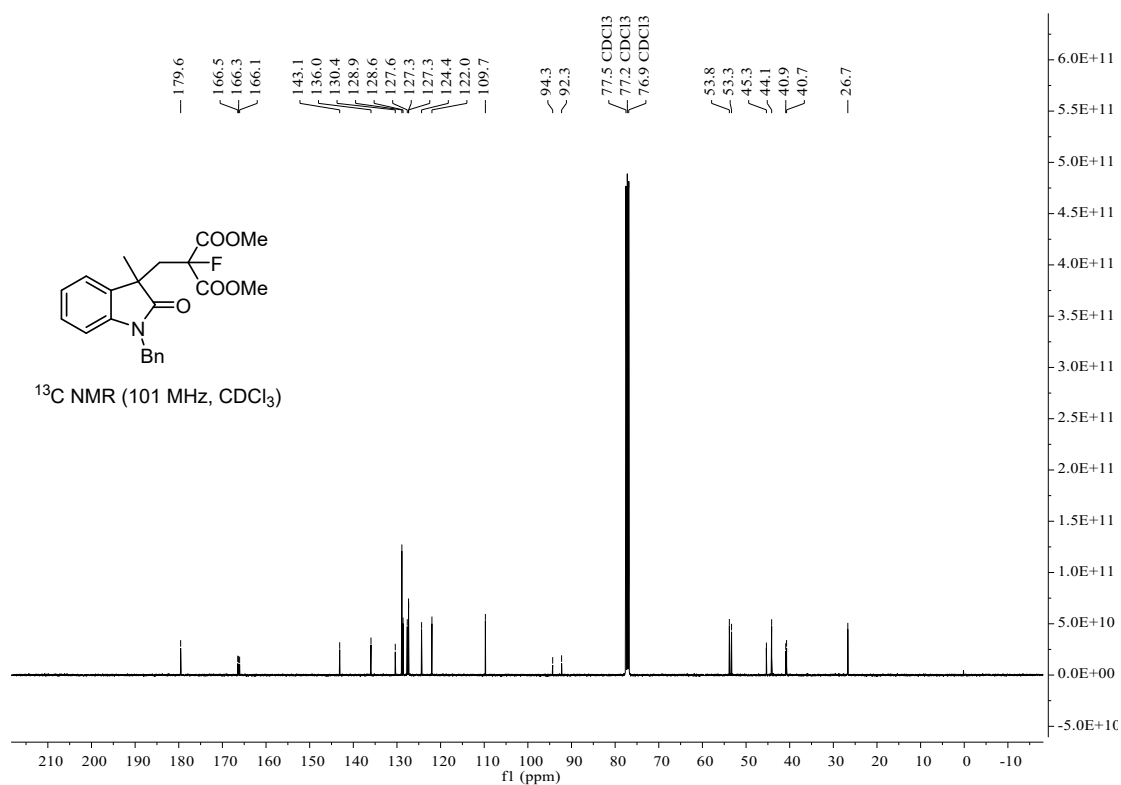

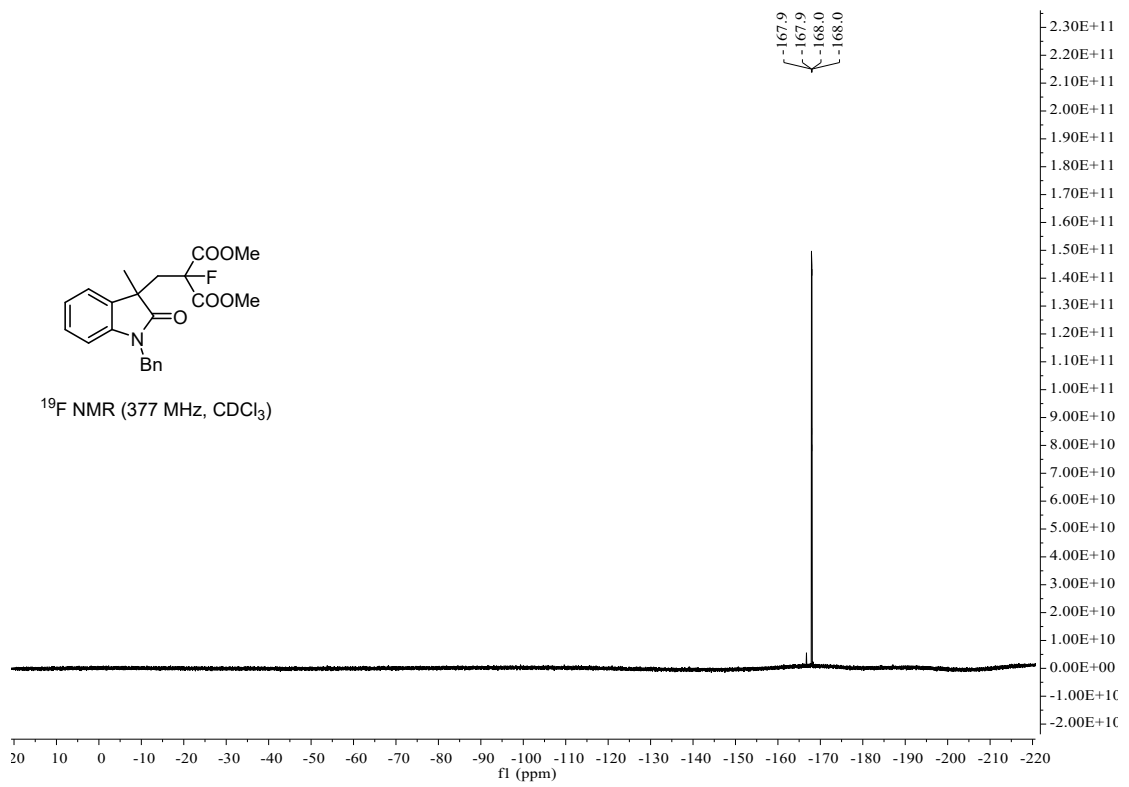

# Compound 12

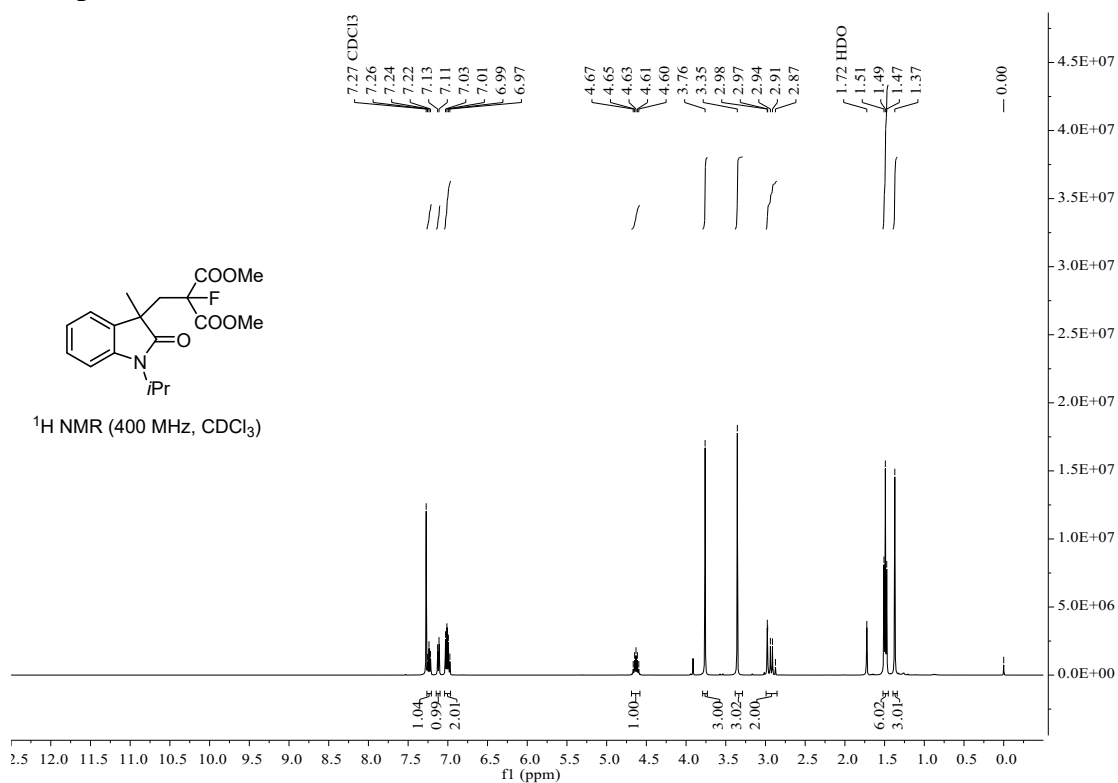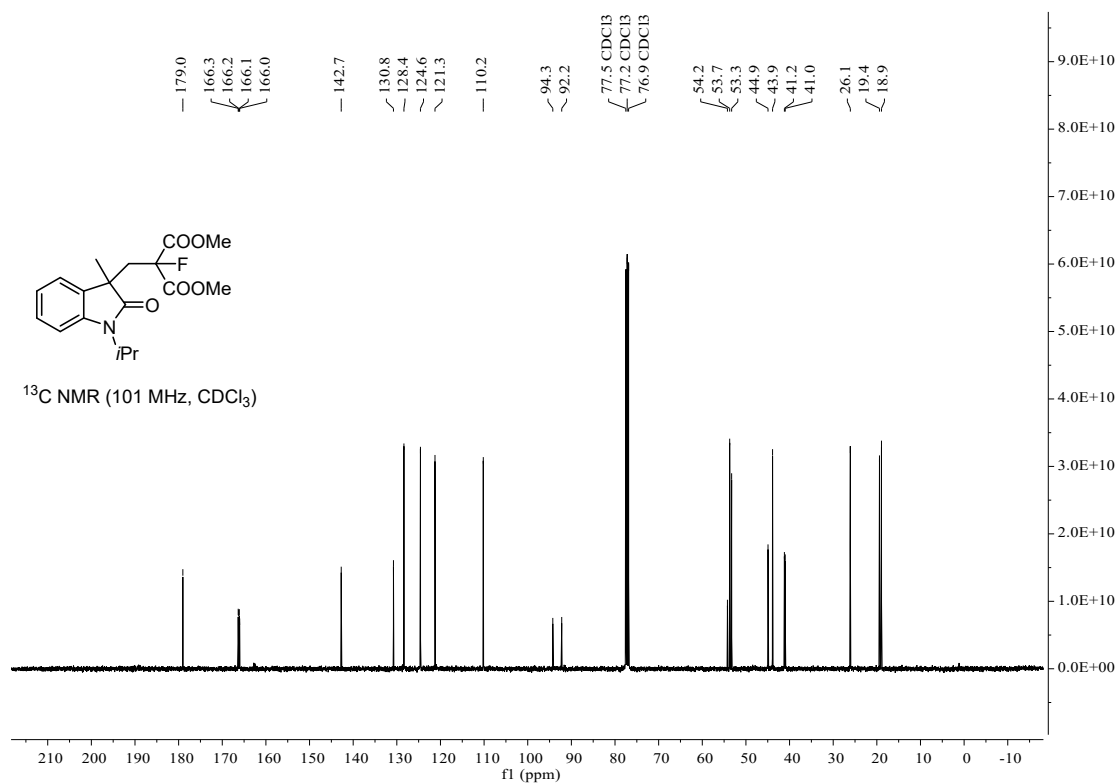



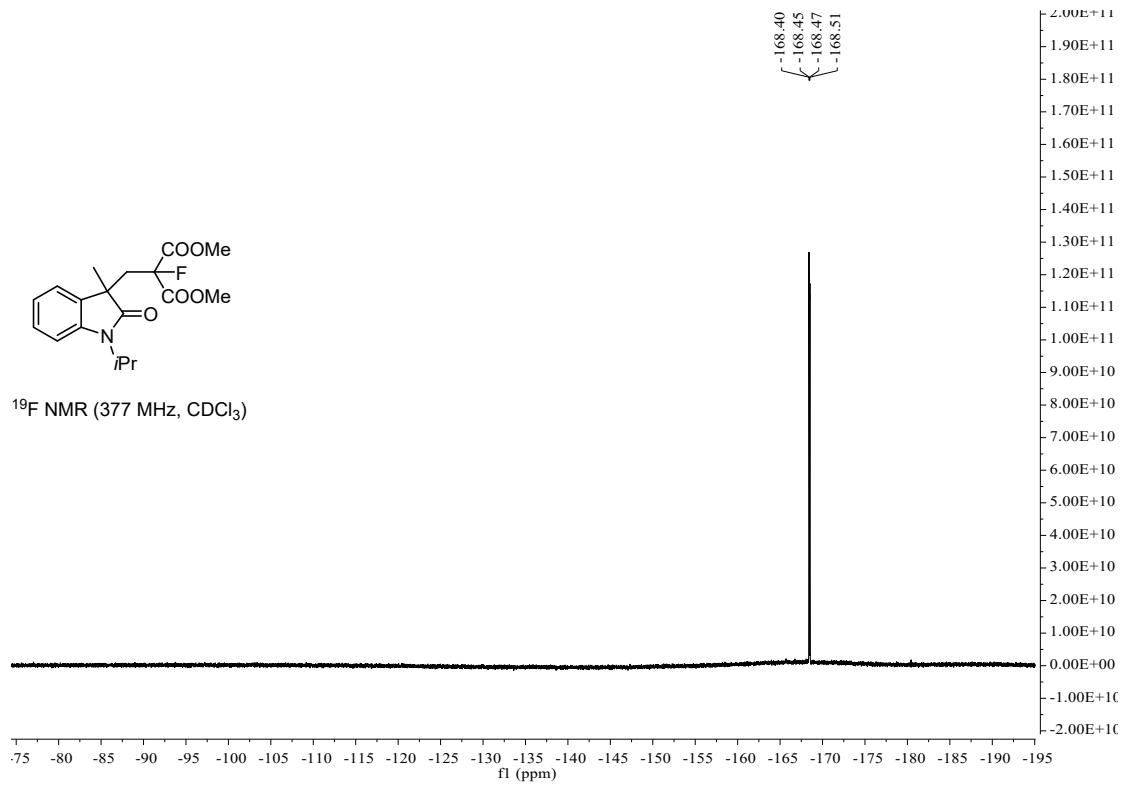

# Compound 13

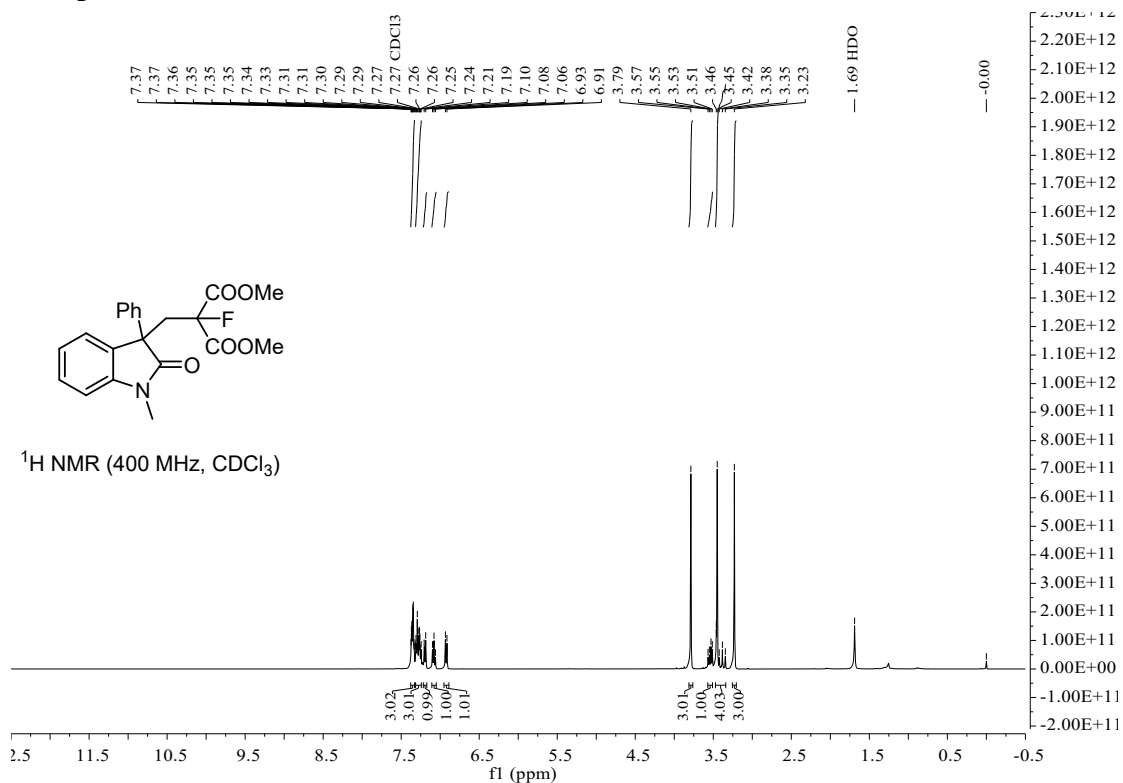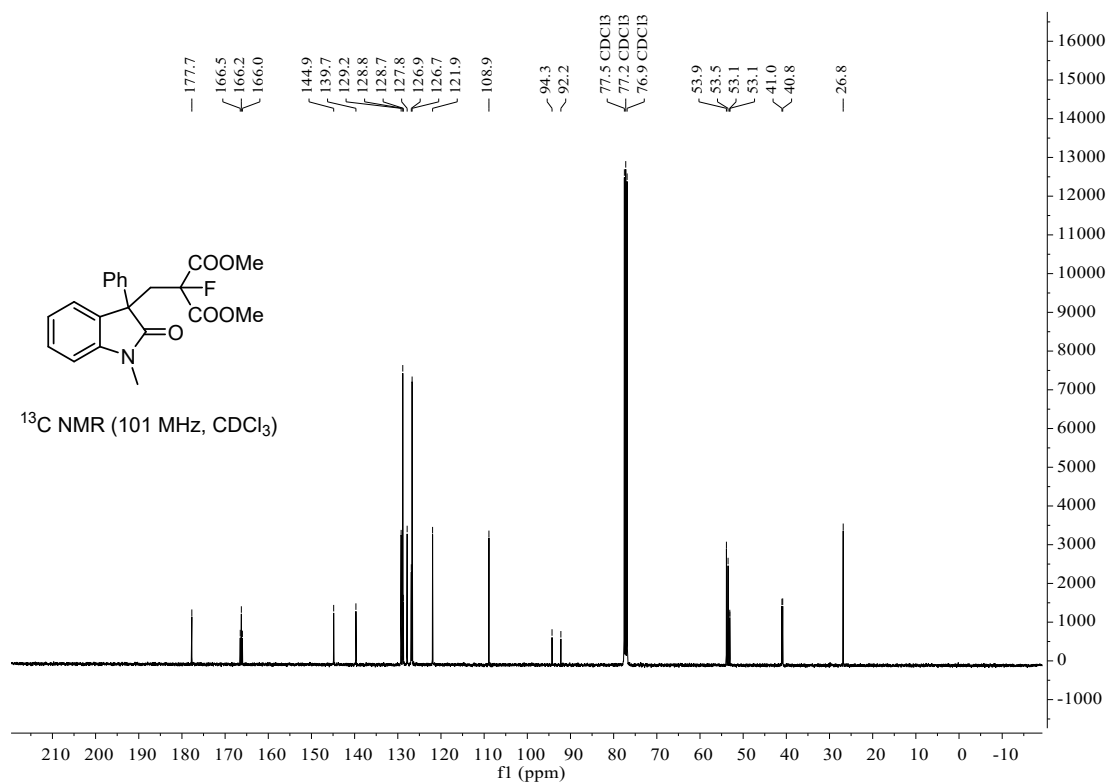

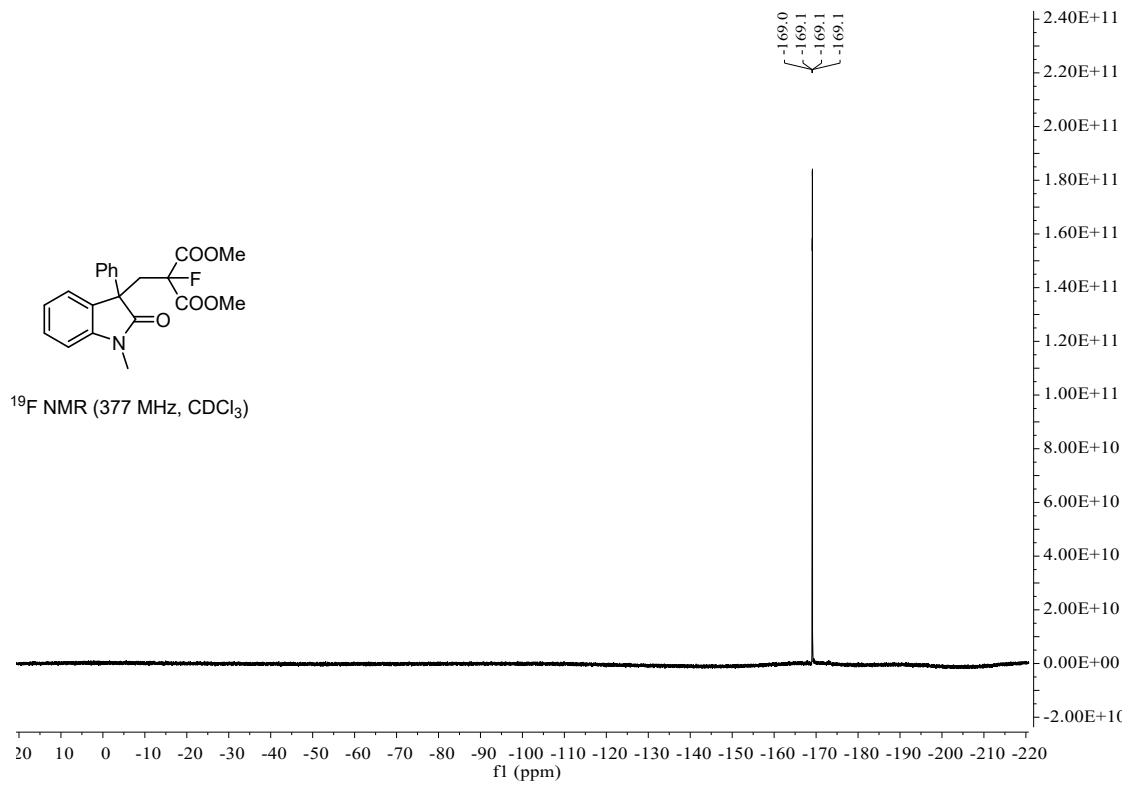

# Compound 14

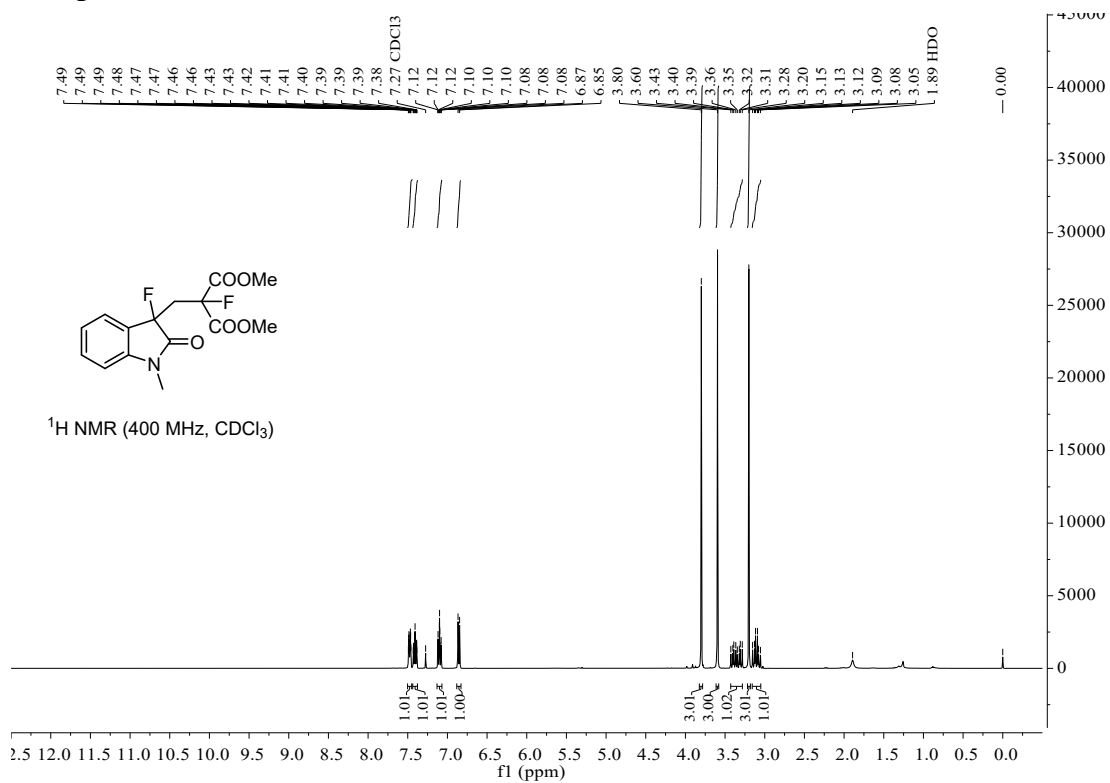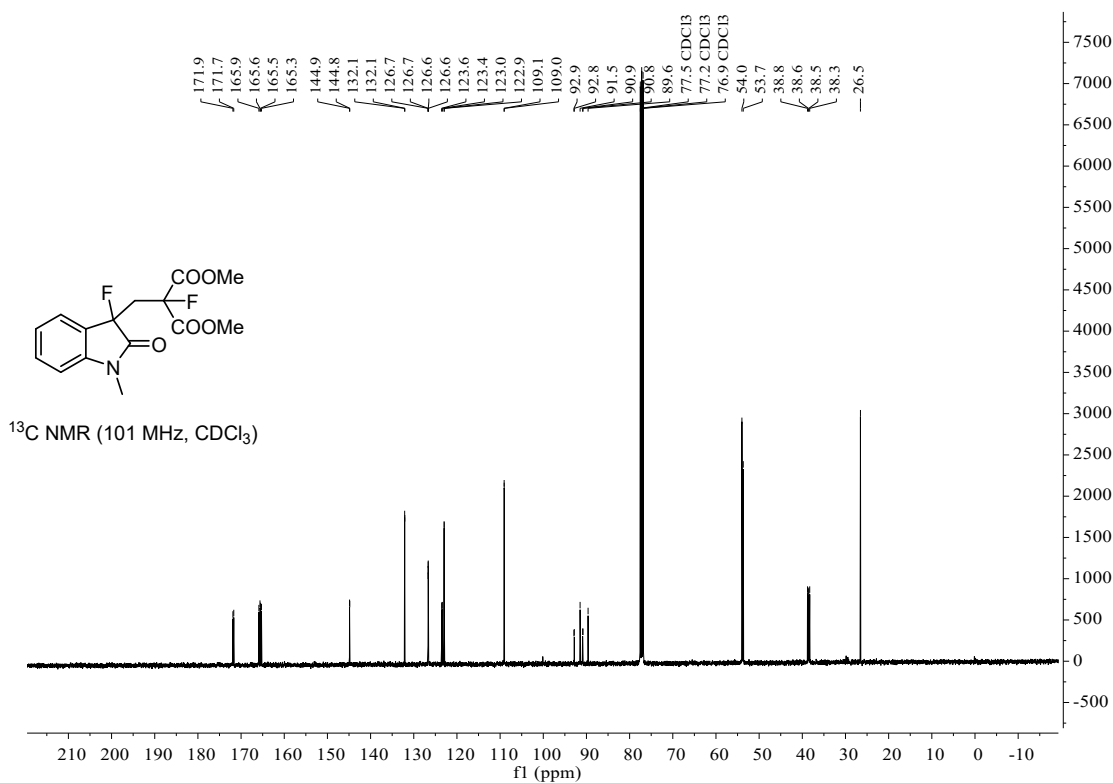

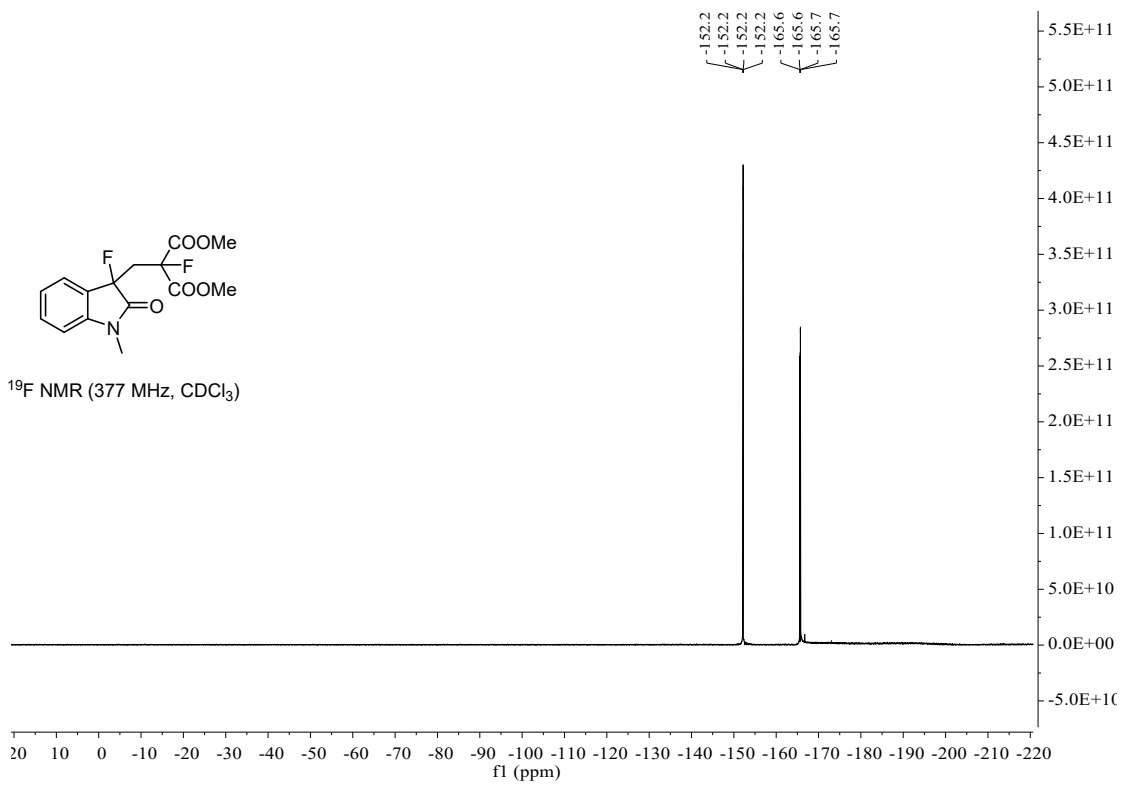

# Compound 15

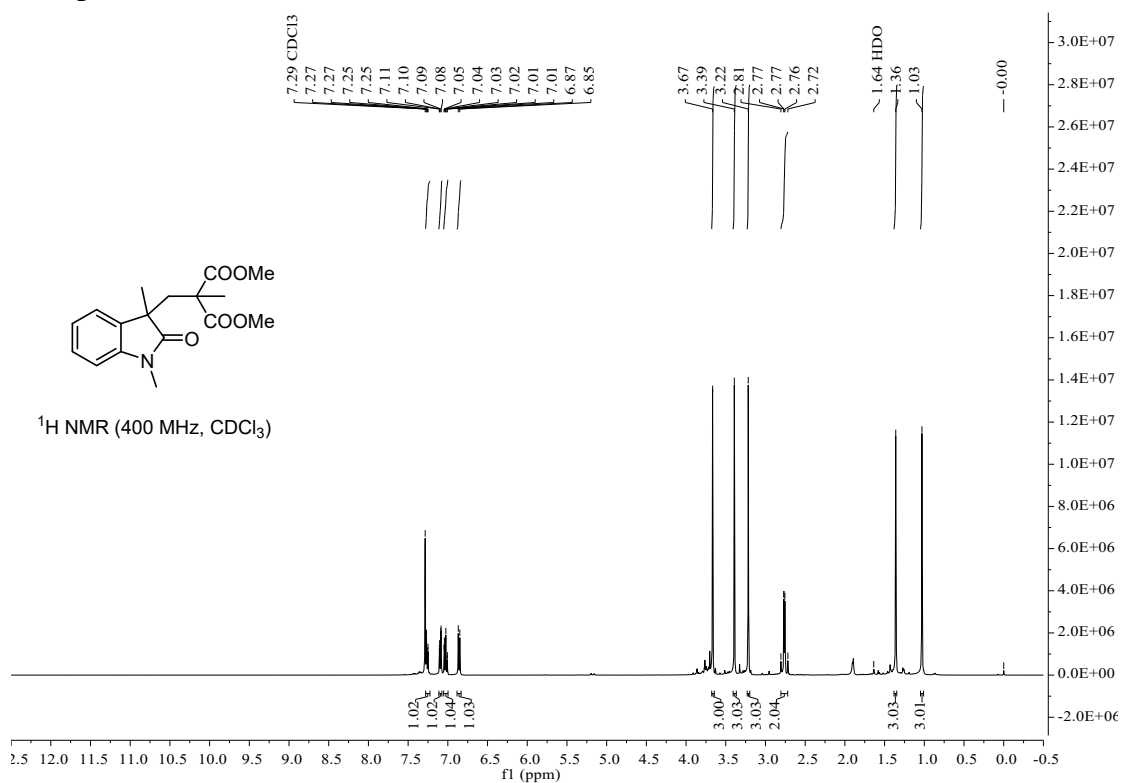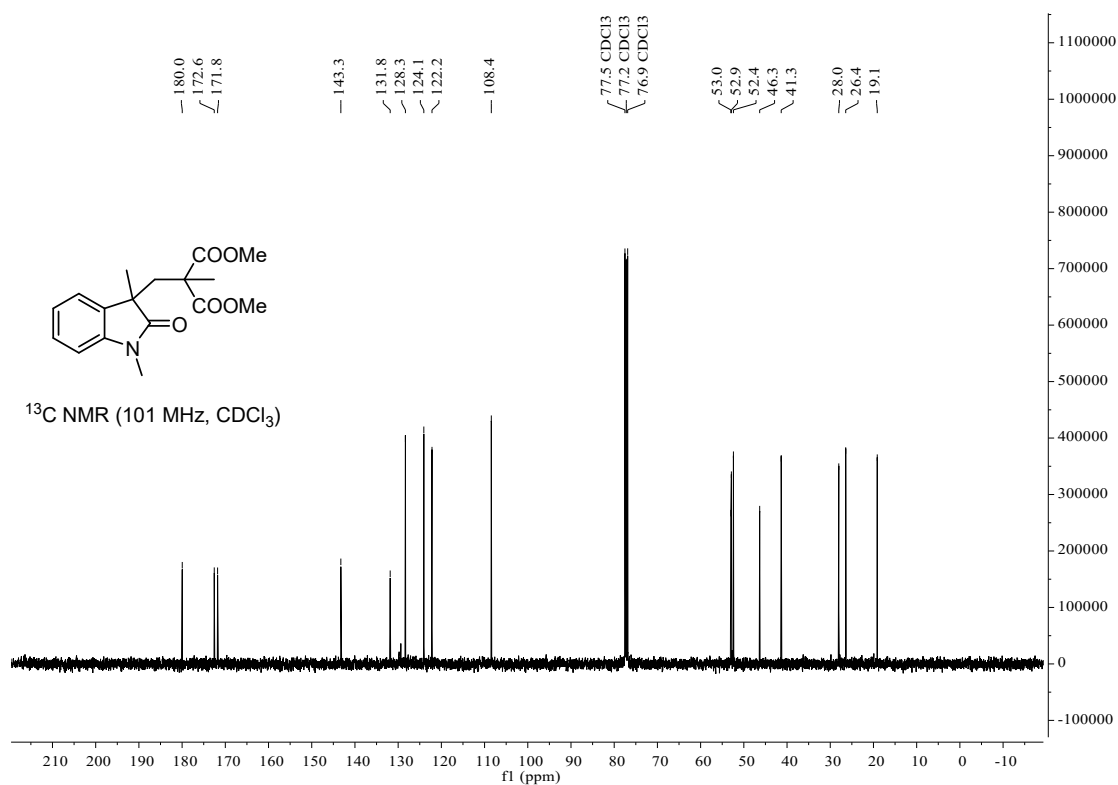

# Compound 16

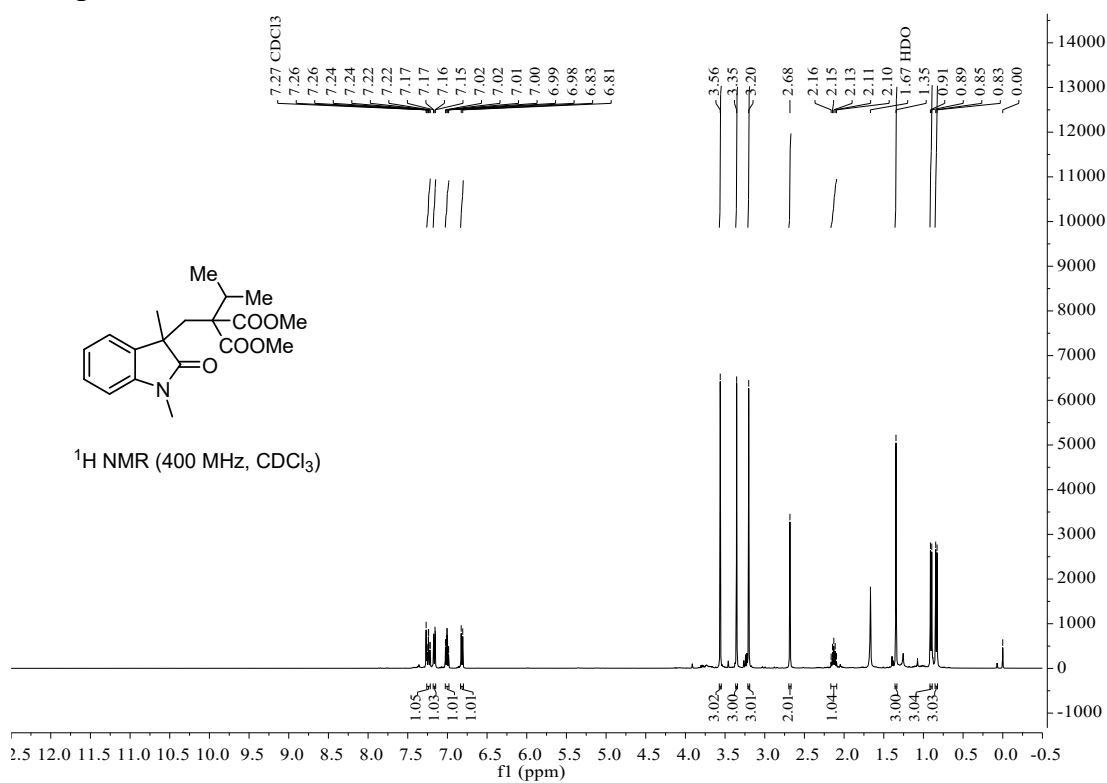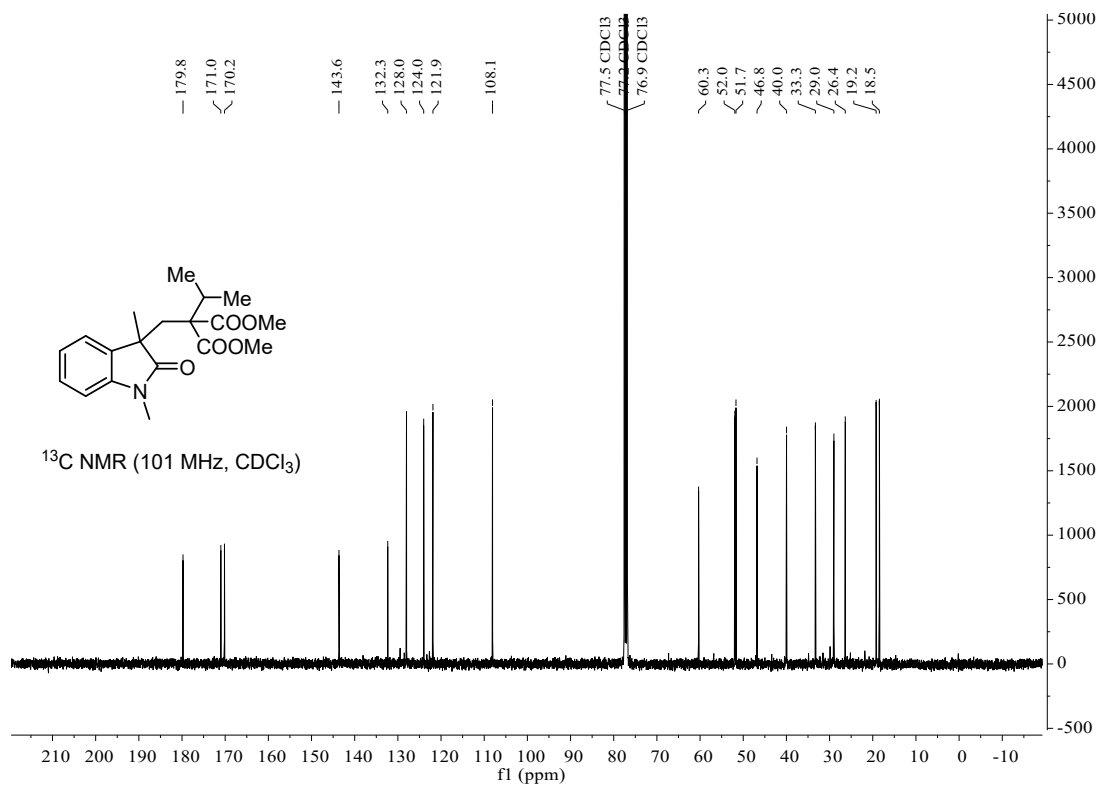

# Compound 17

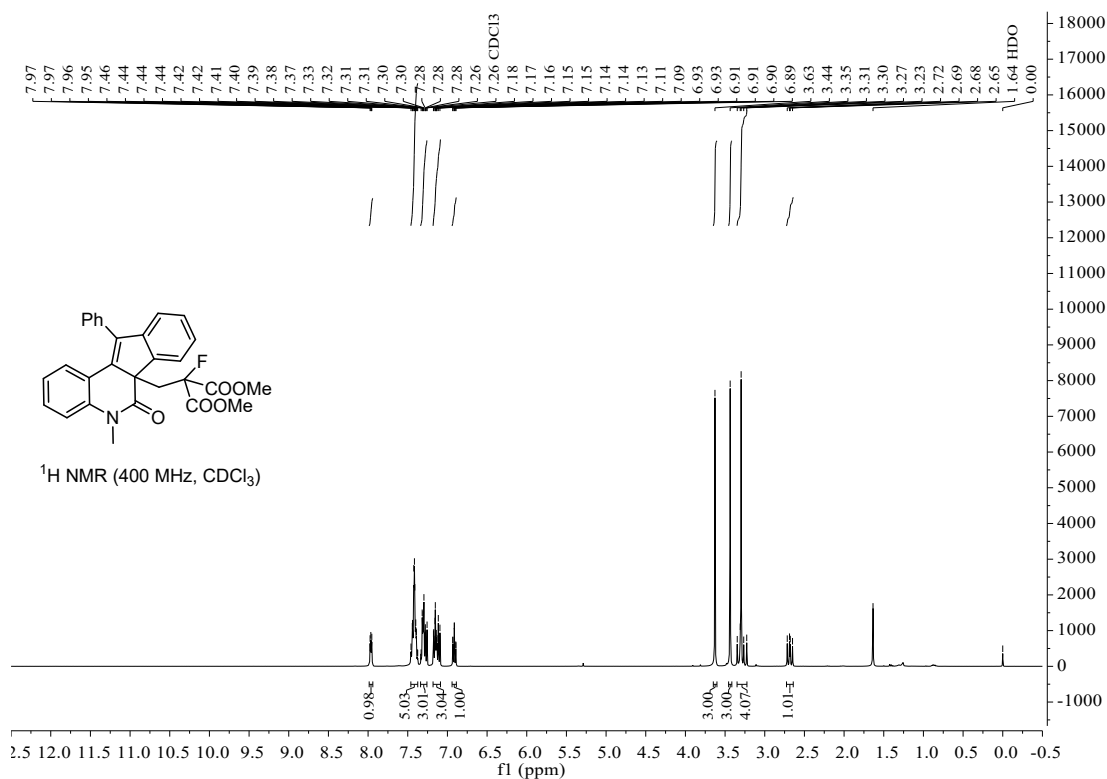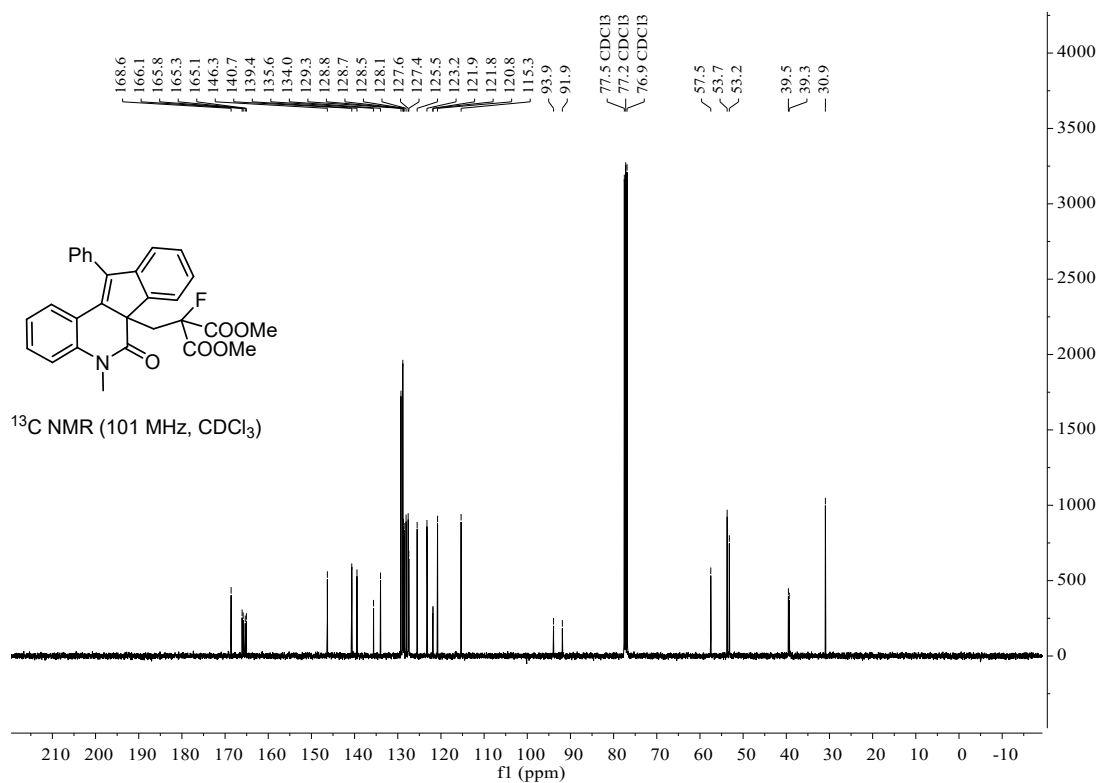



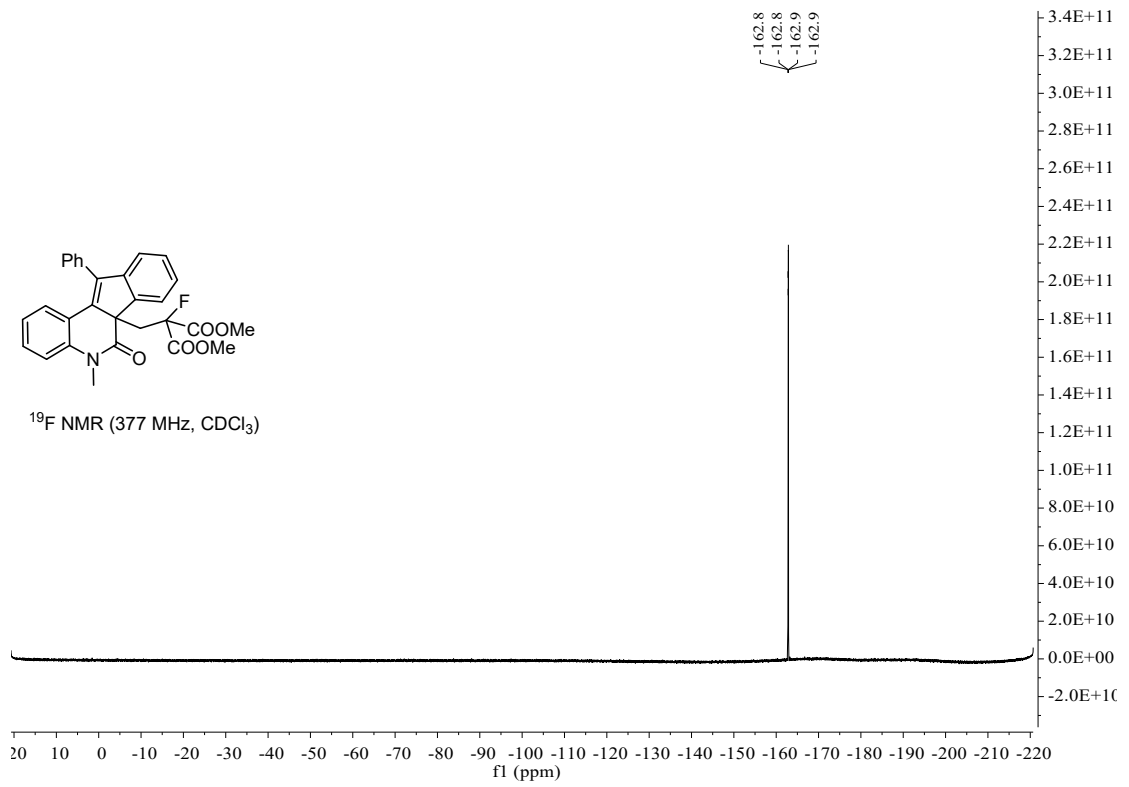

# Compound 18

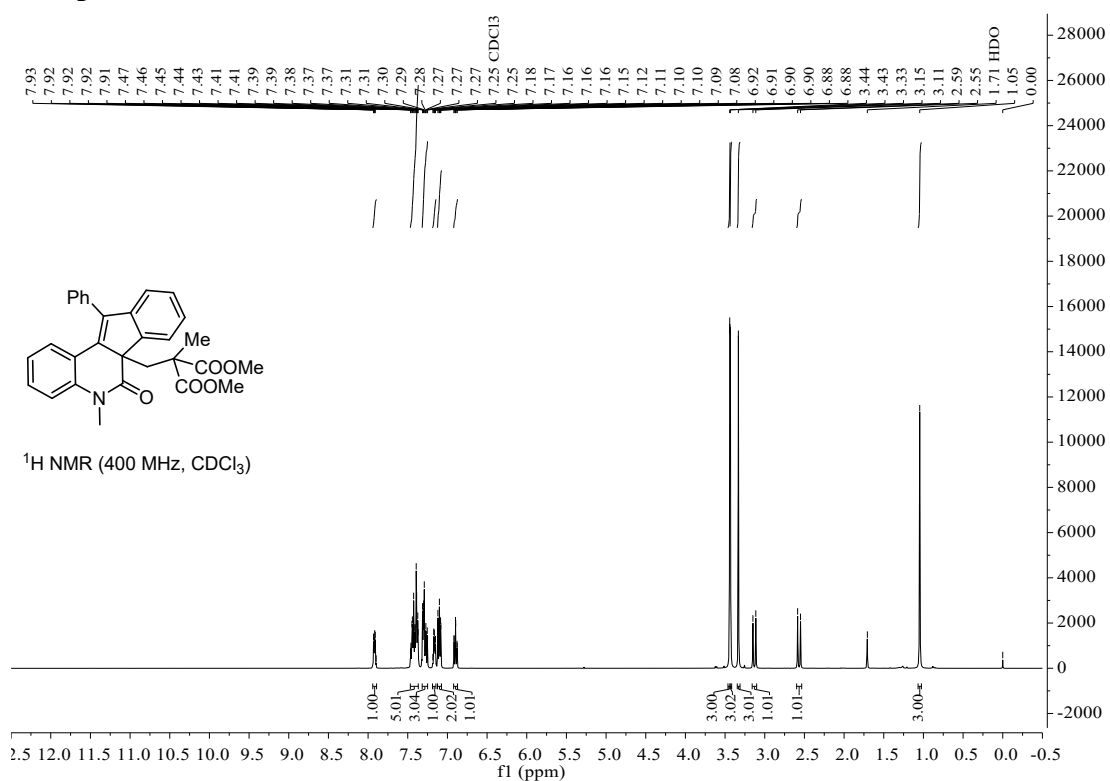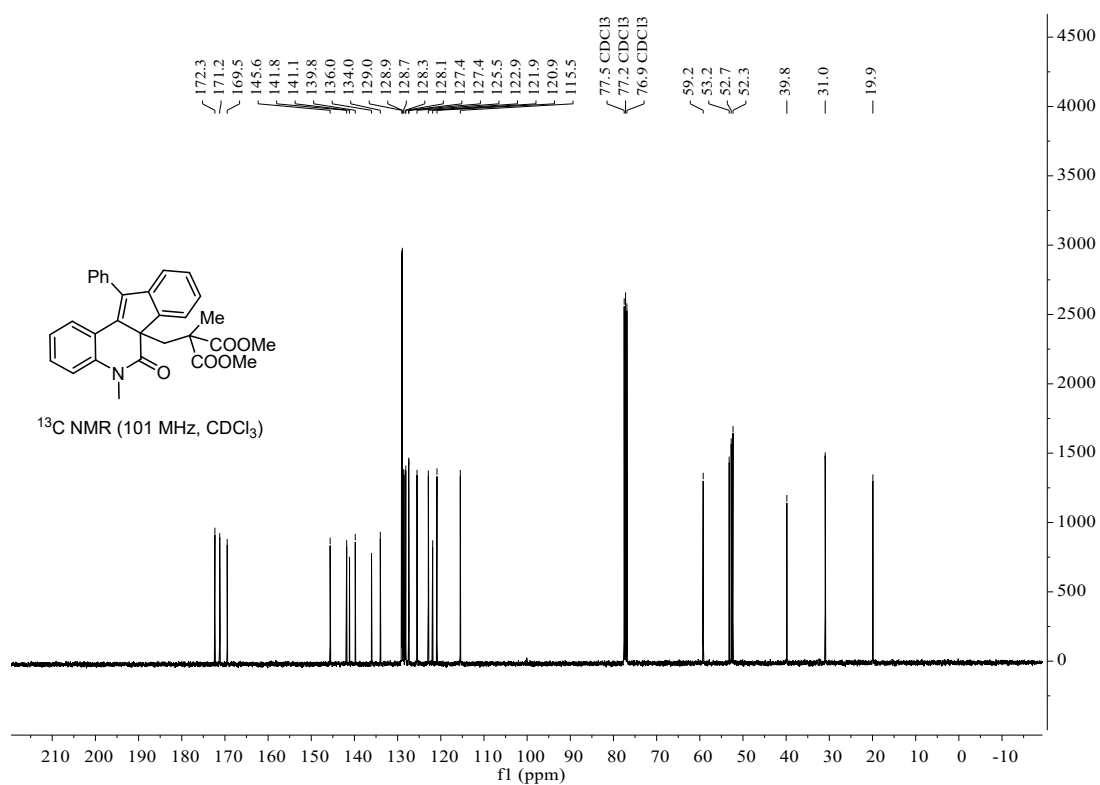

# Compound 19

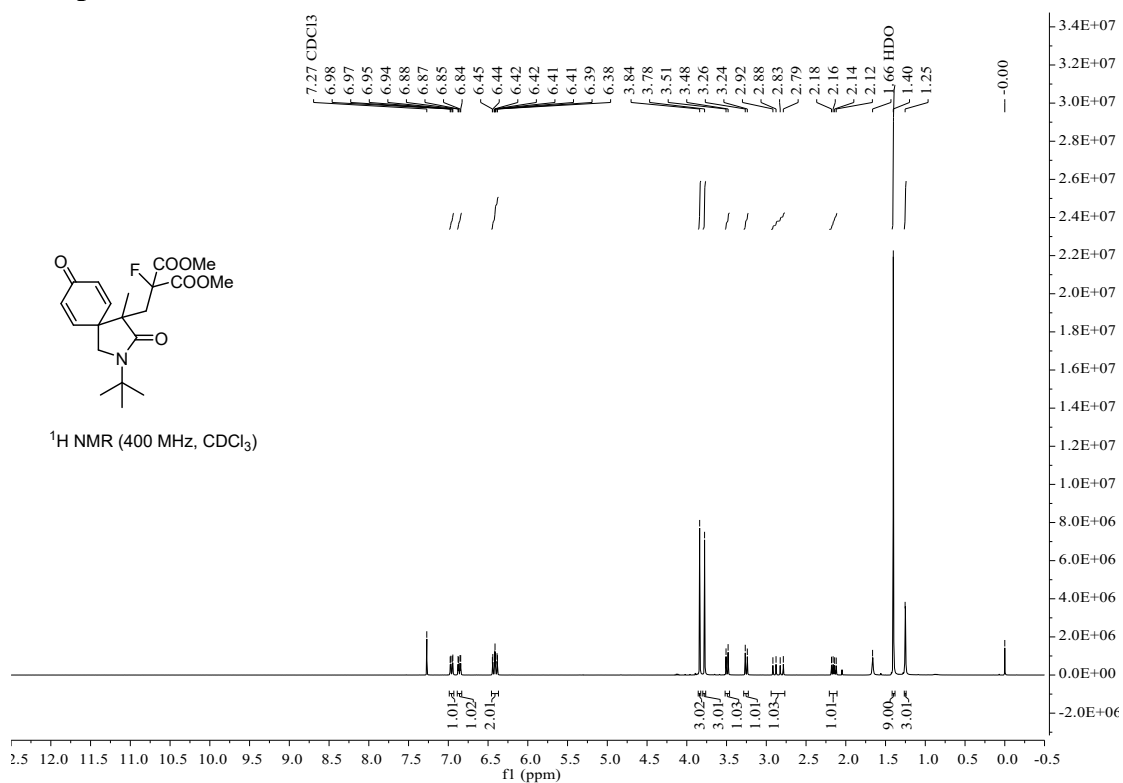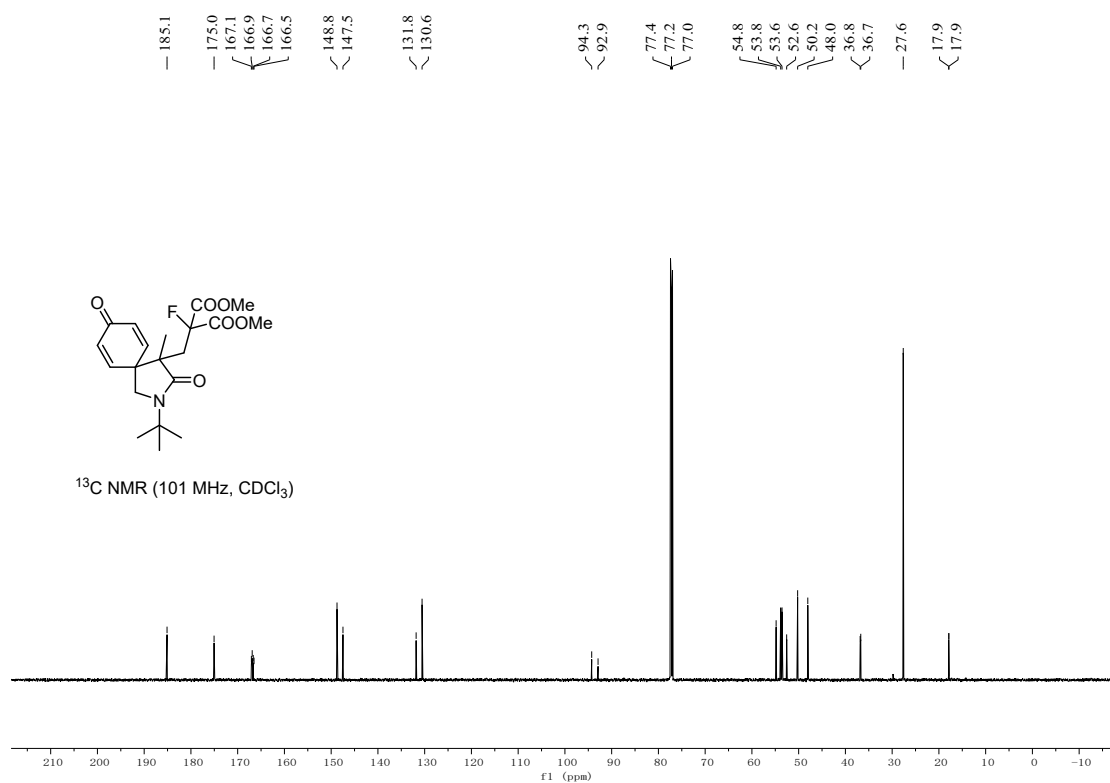

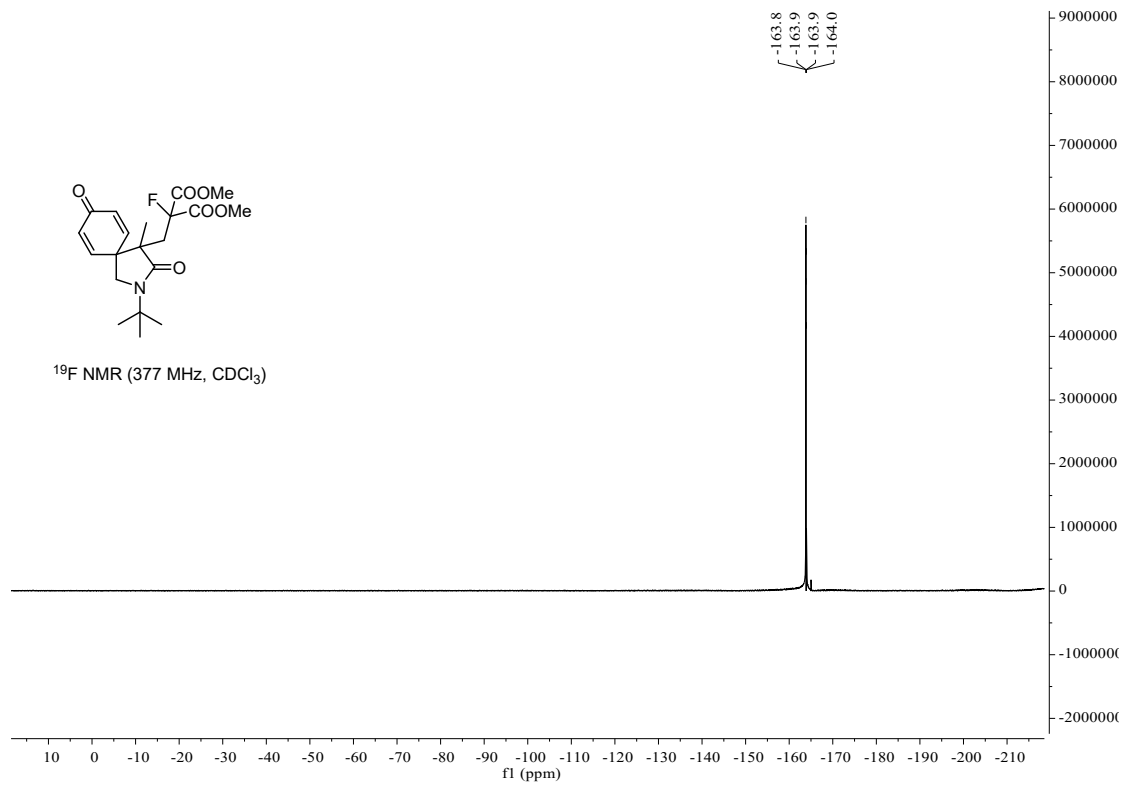

# Compound 20

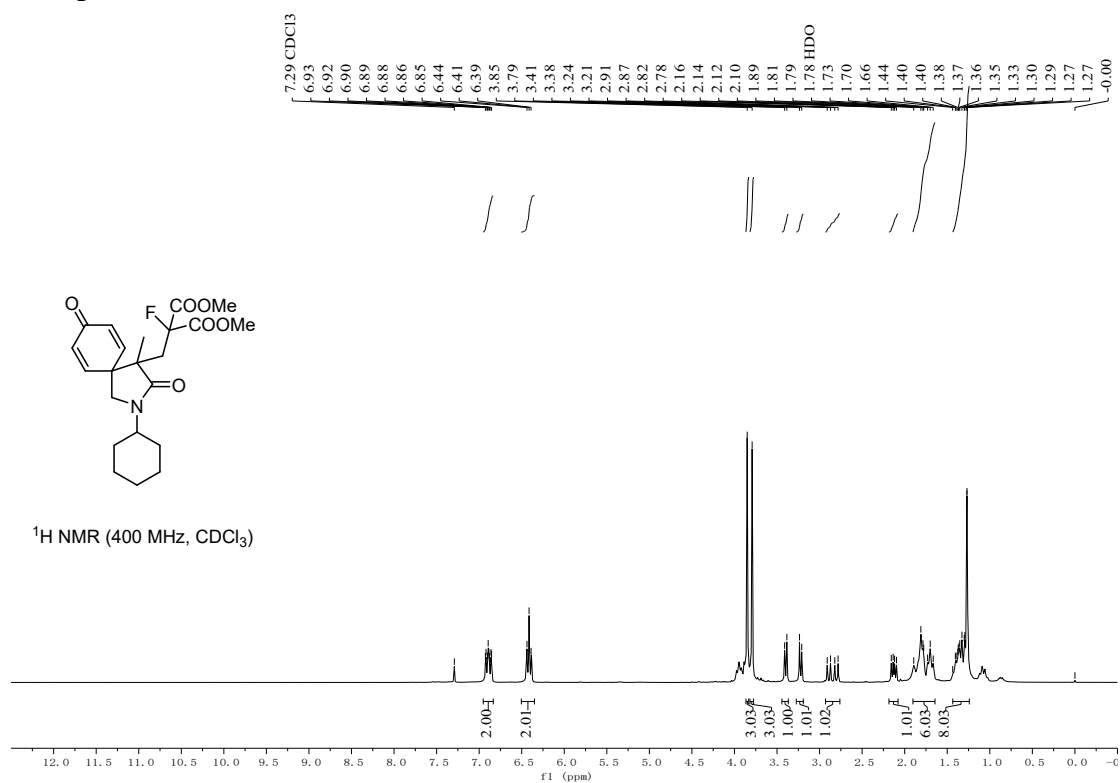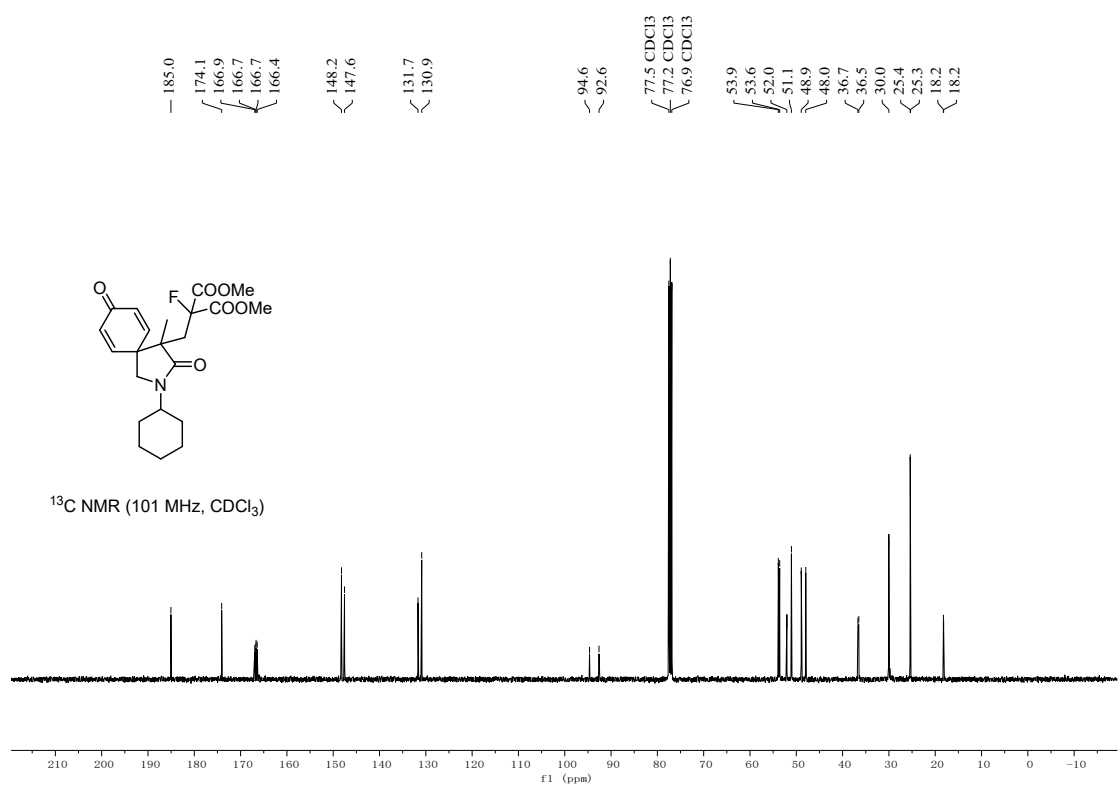

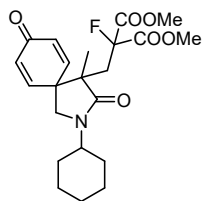

$^{19}\text{F}$  NMR (377 MHz,  $\text{CDCl}_3$ )

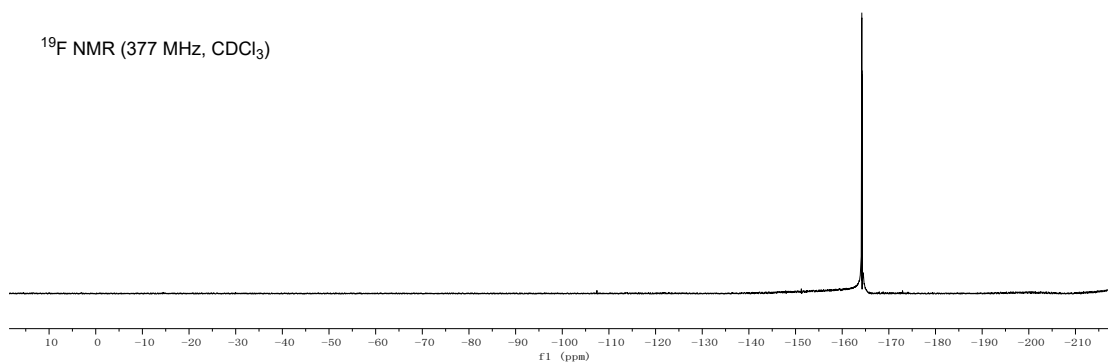

# Compound 21

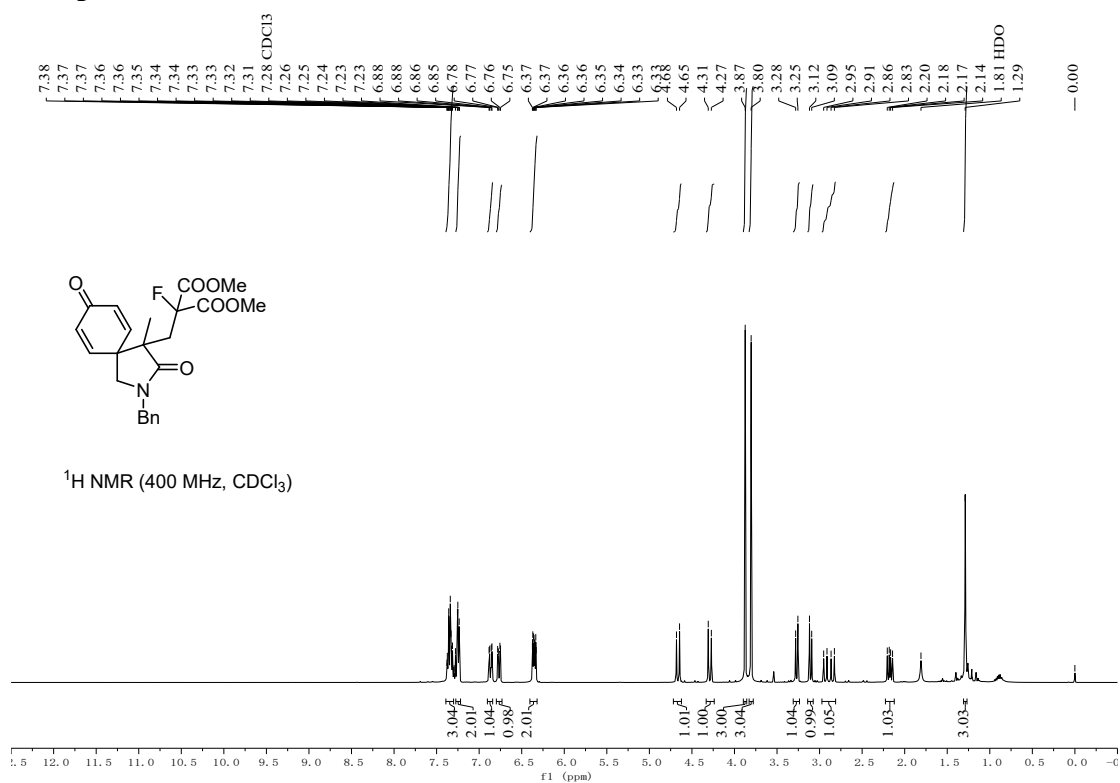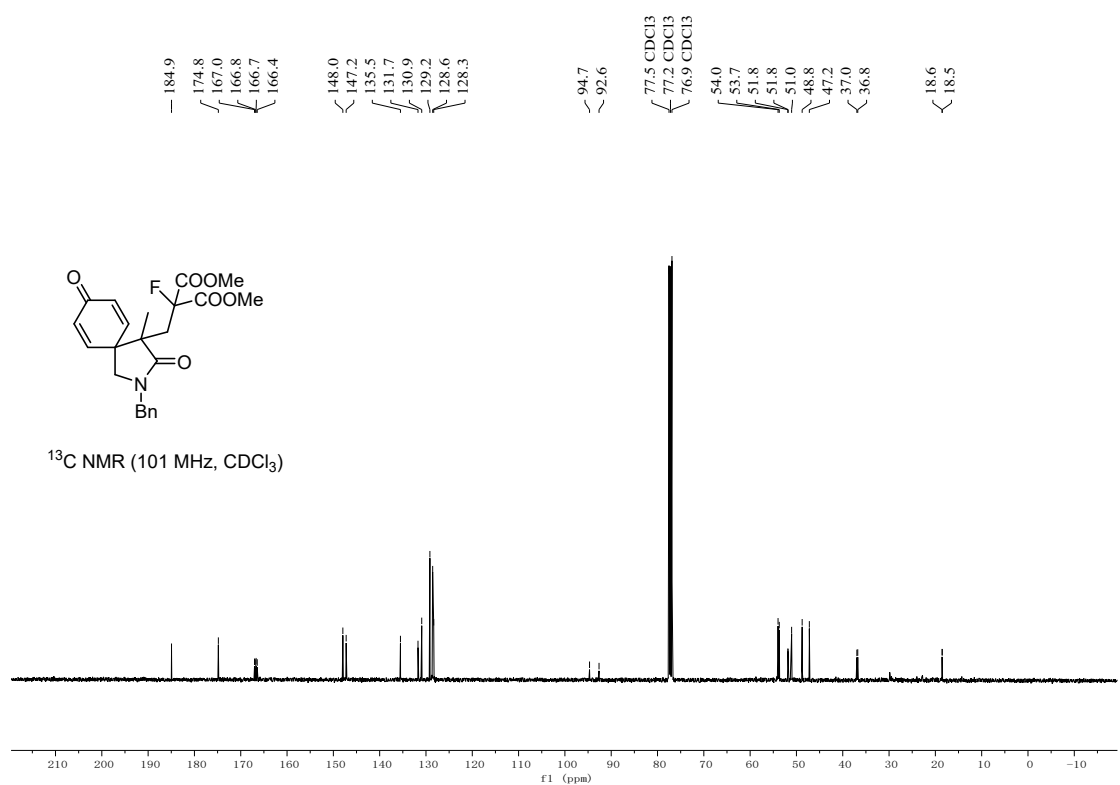

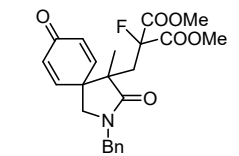

$^{19}\text{F}$  NMR (377 MHz,  $\text{CDCl}_3$ )

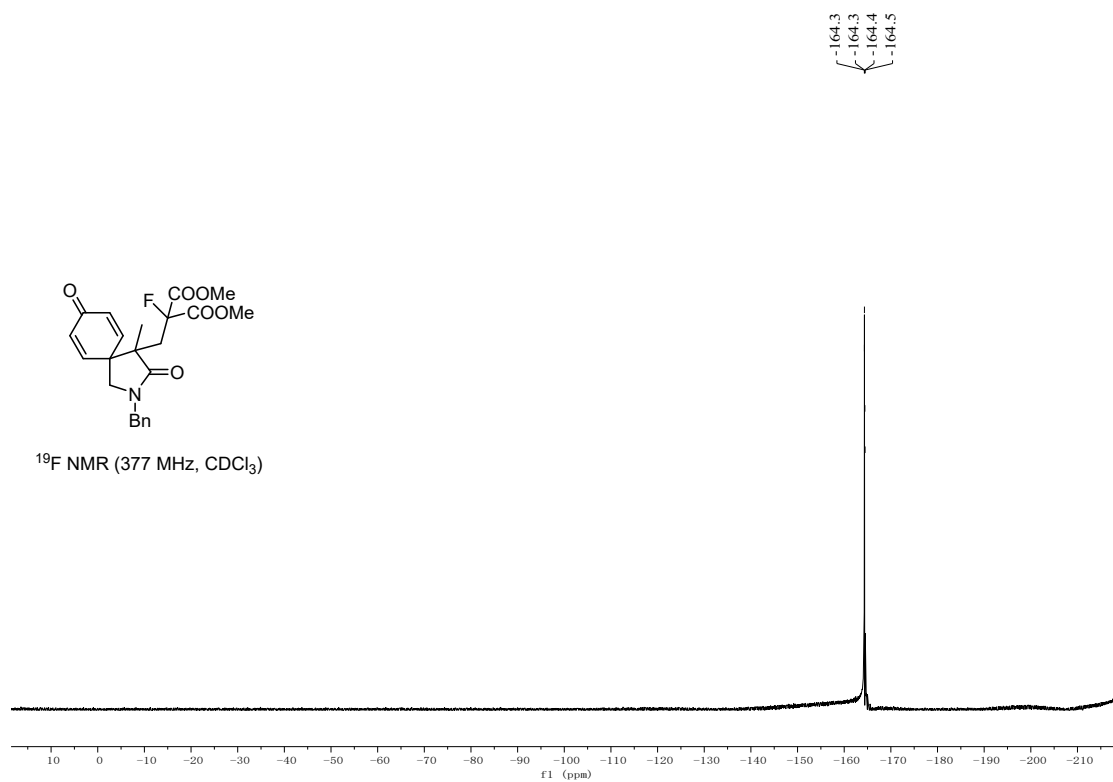



# Compound 22

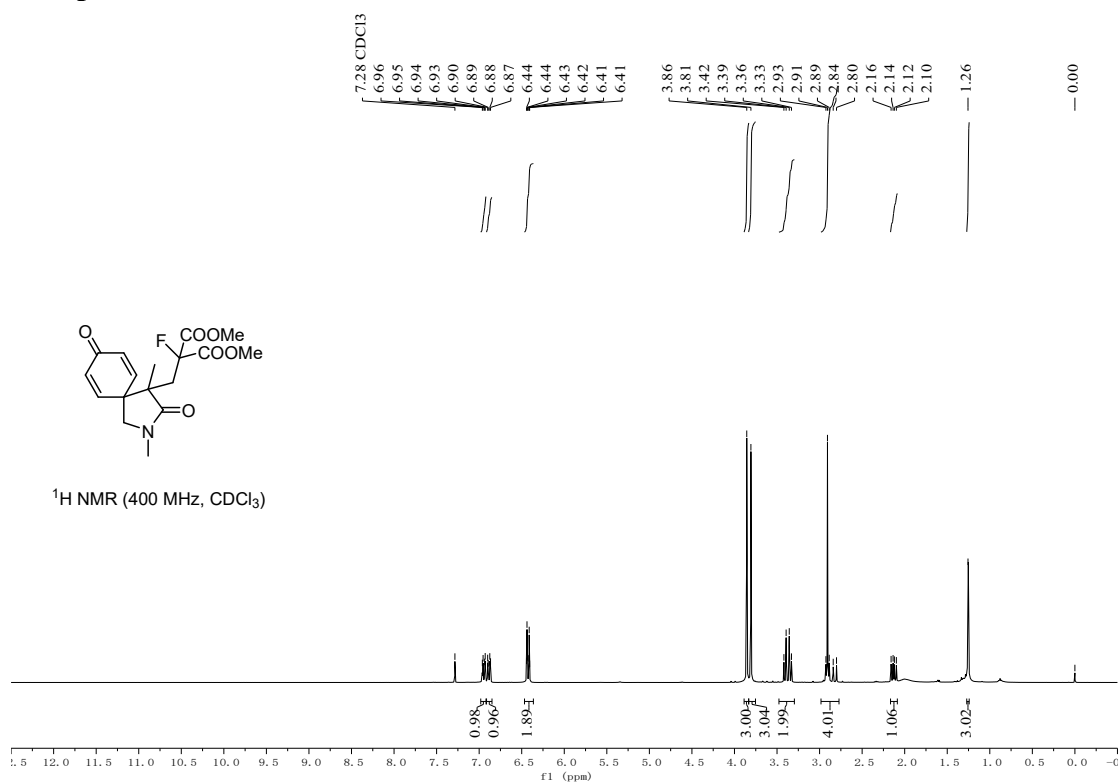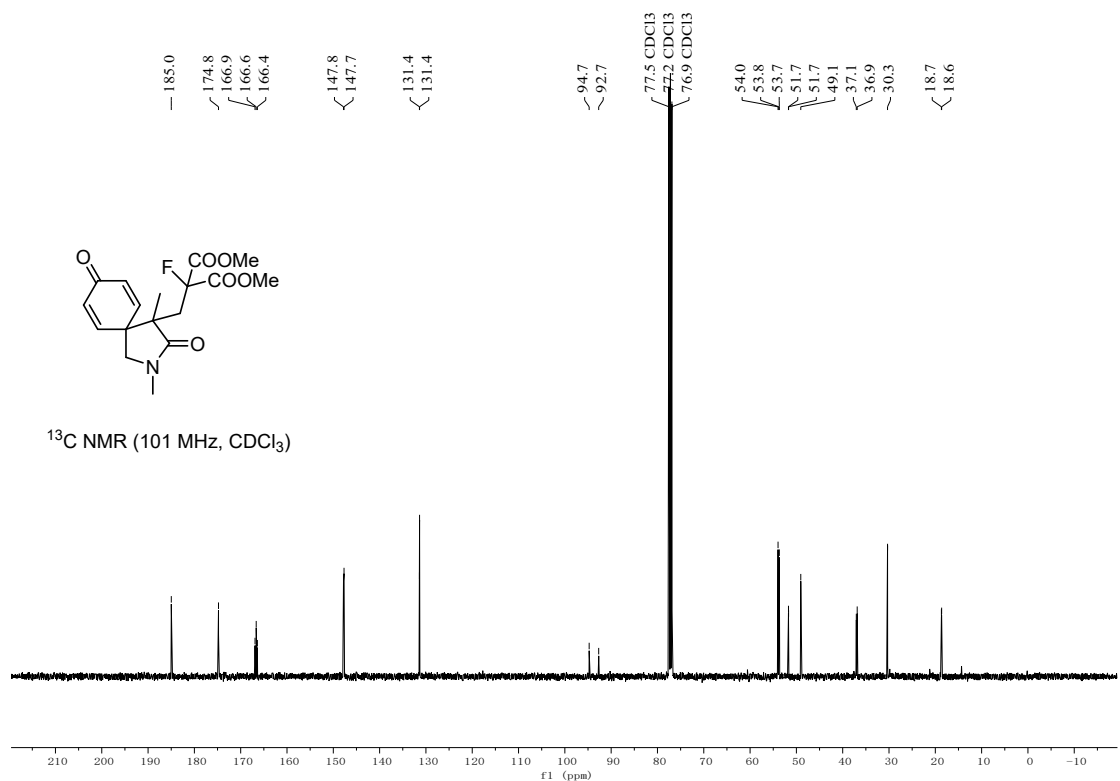

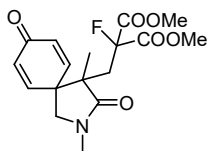

$^{19}\text{F}$  NMR (377 MHz,  $\text{CDCl}_3$ )

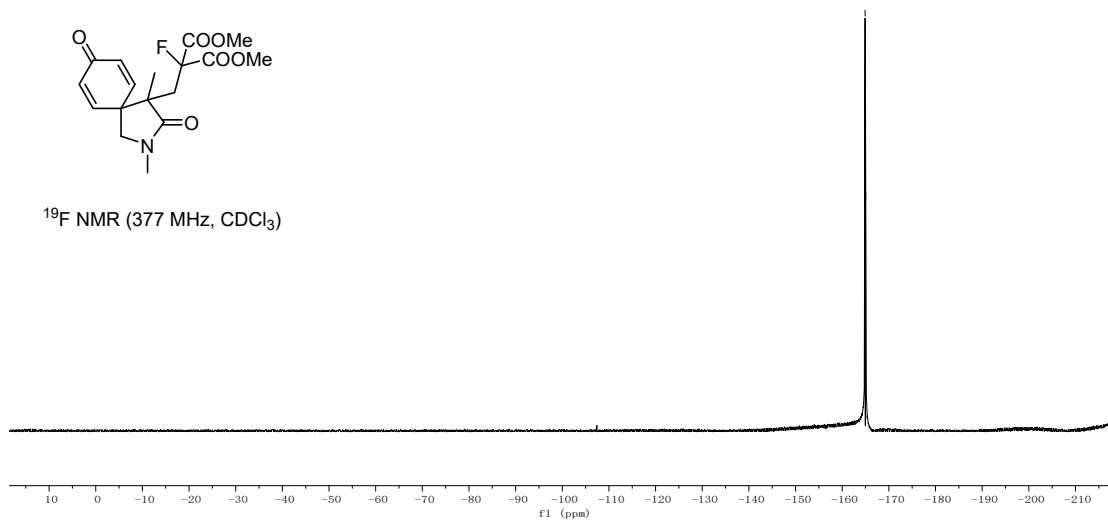

# Compound 23

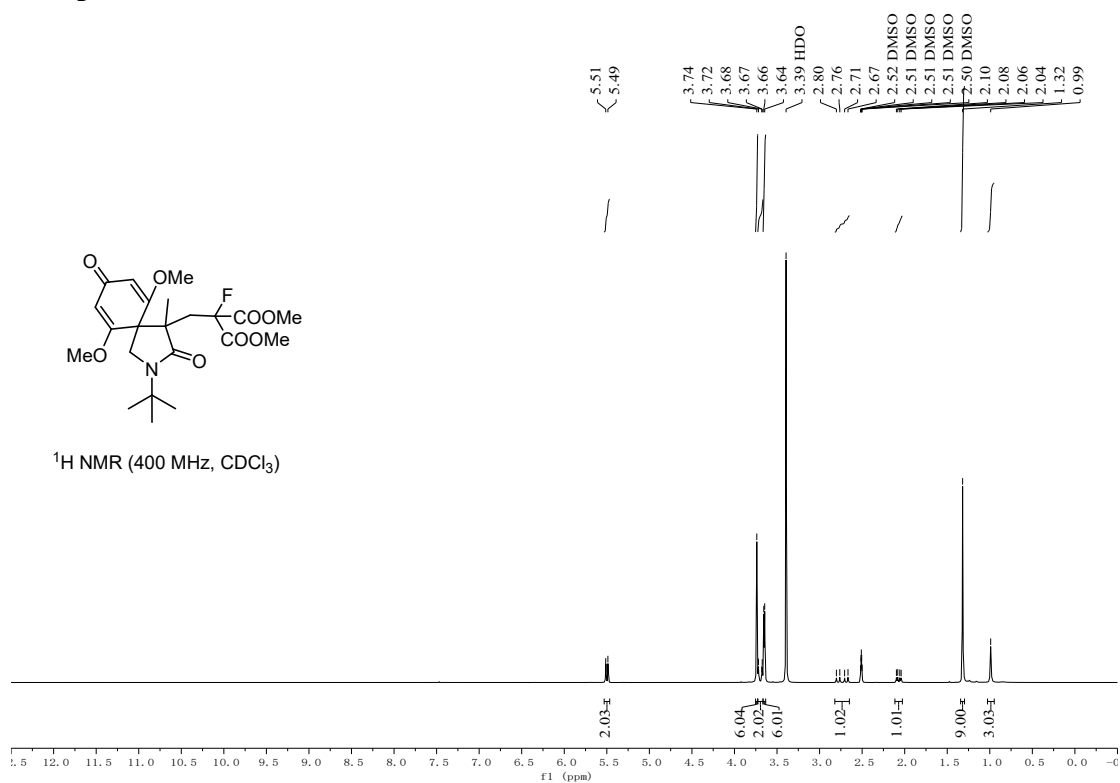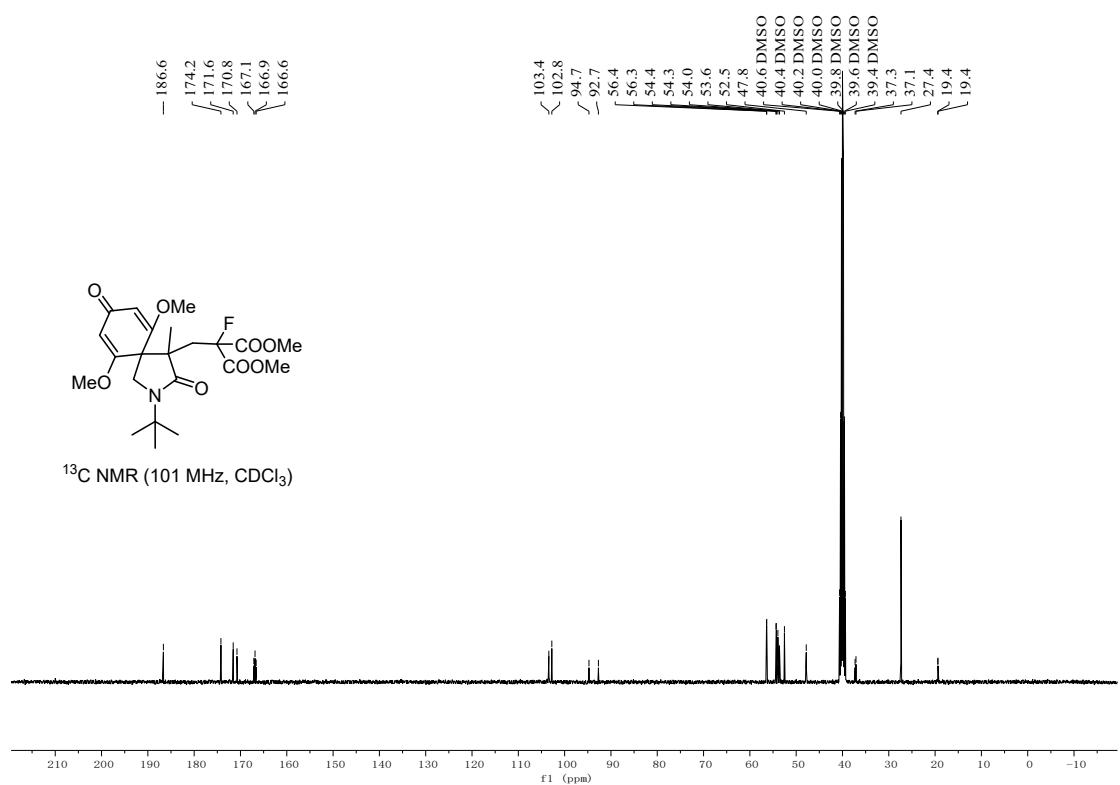

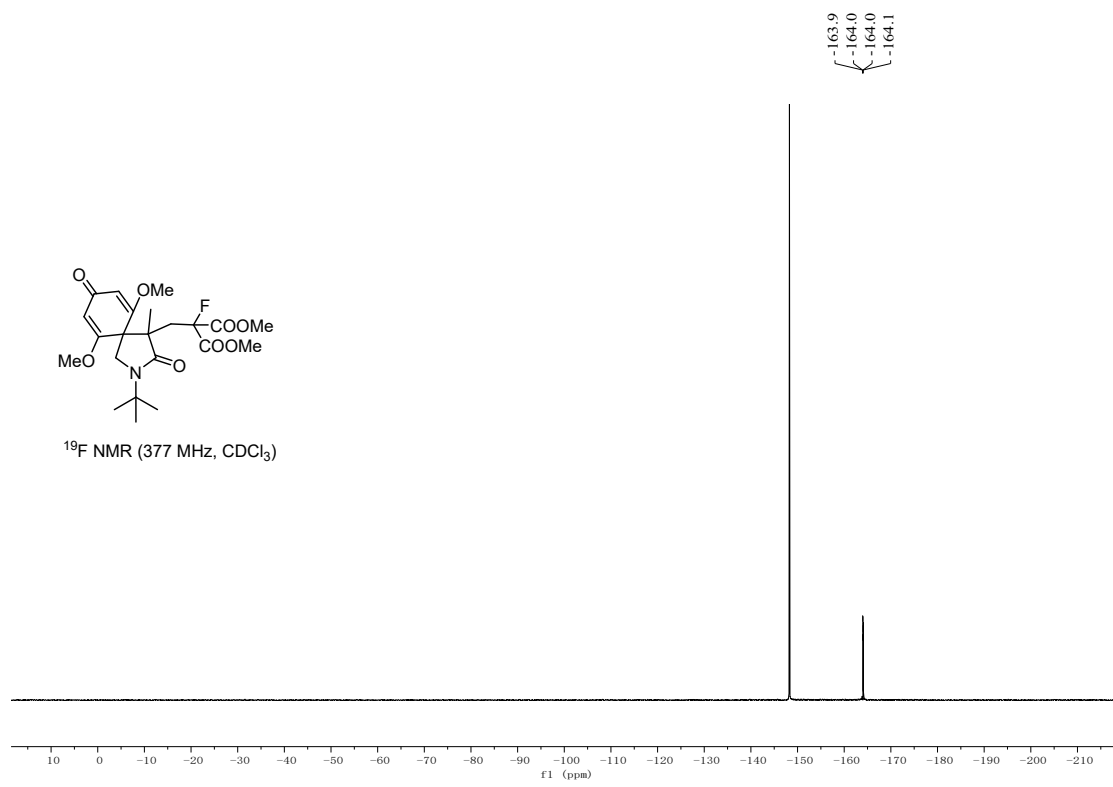

# Compound 24

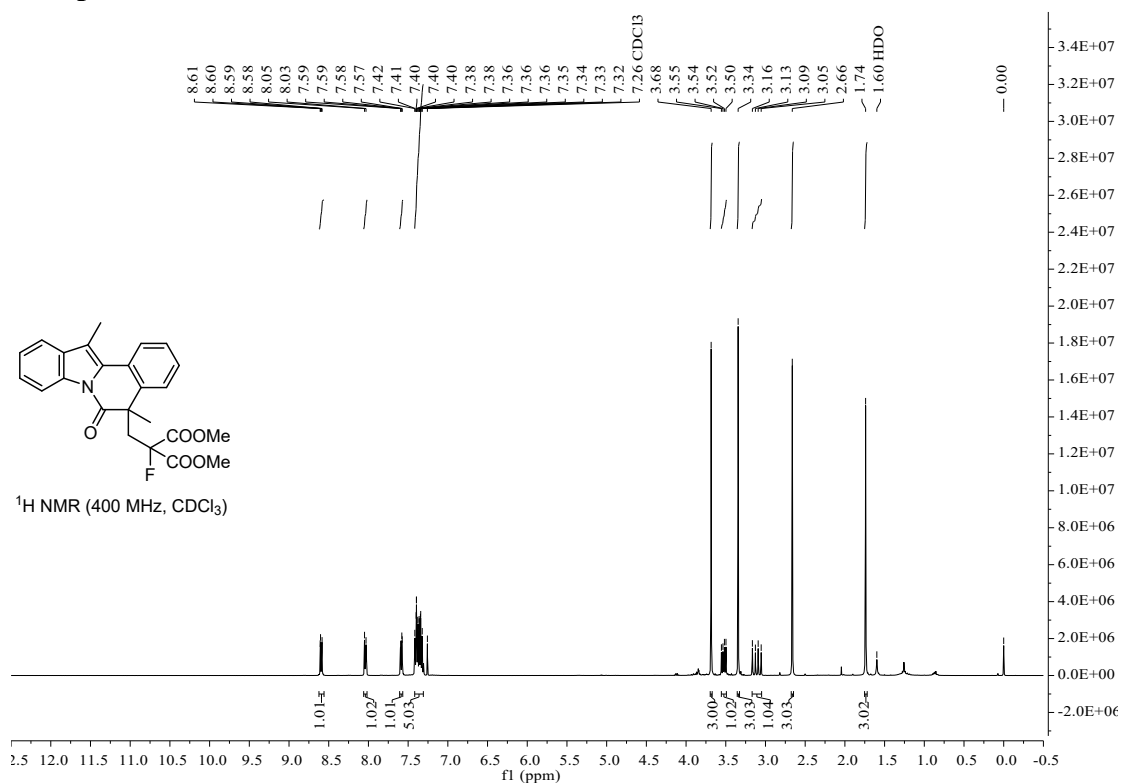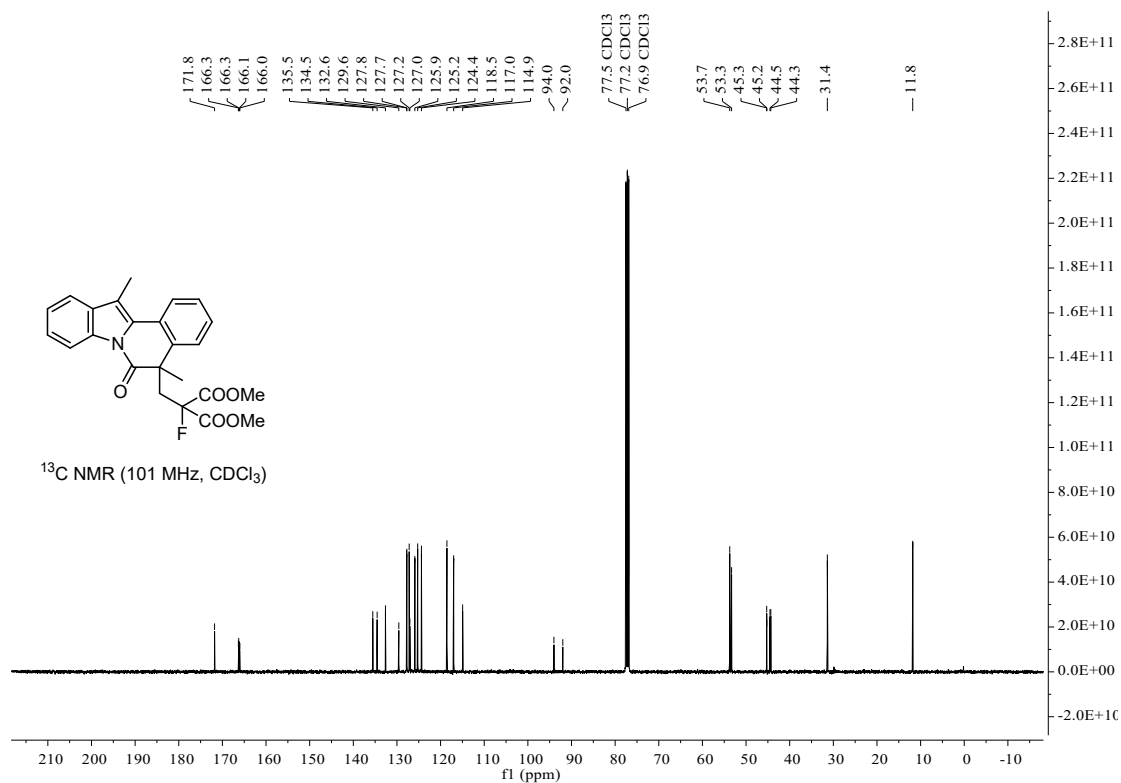

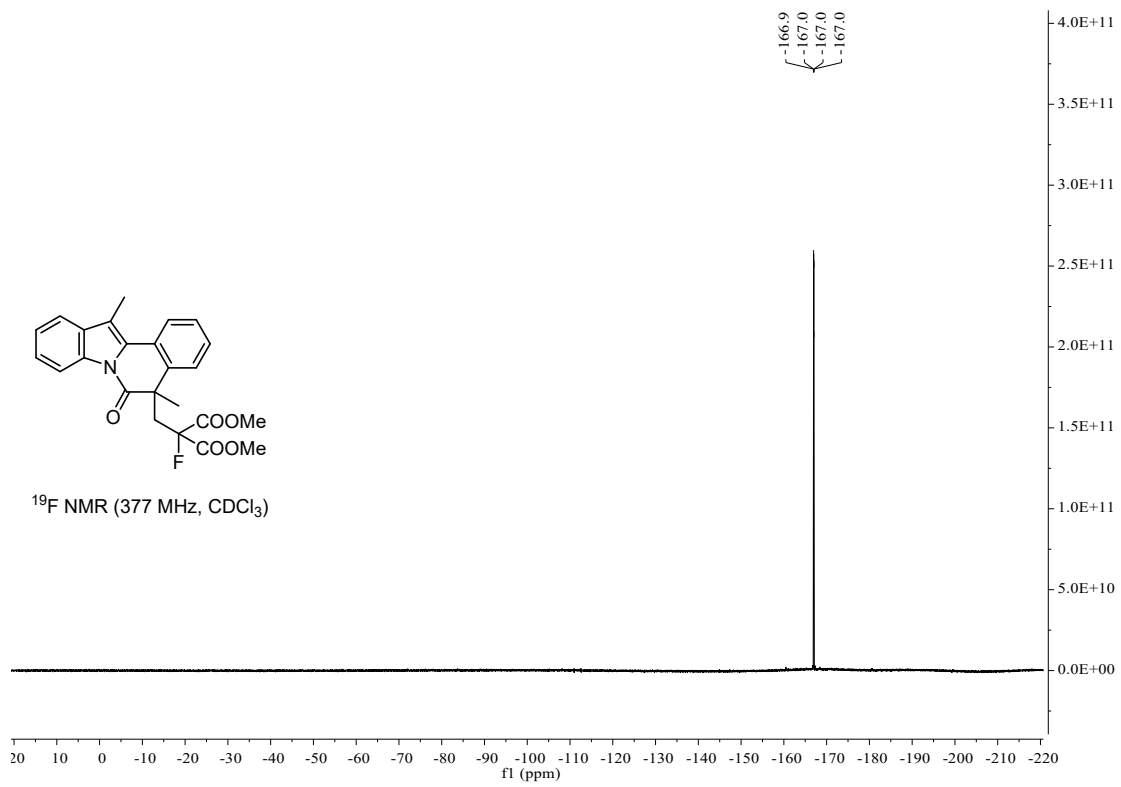

# Compound 25

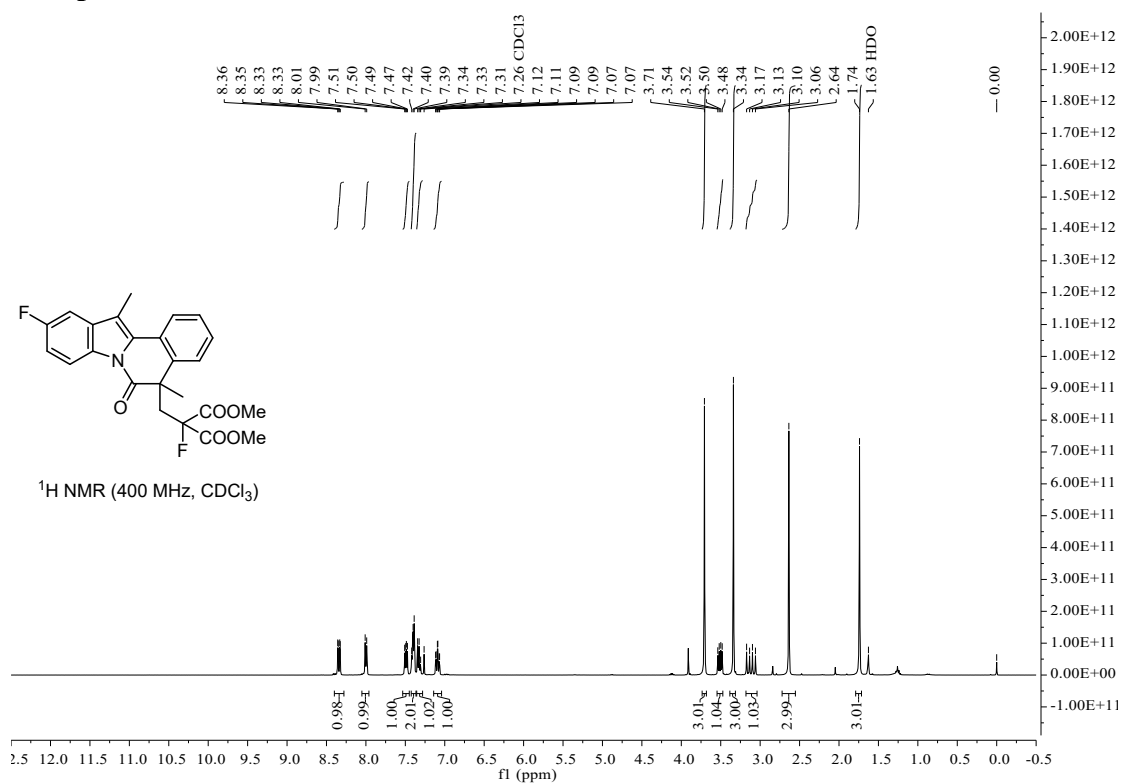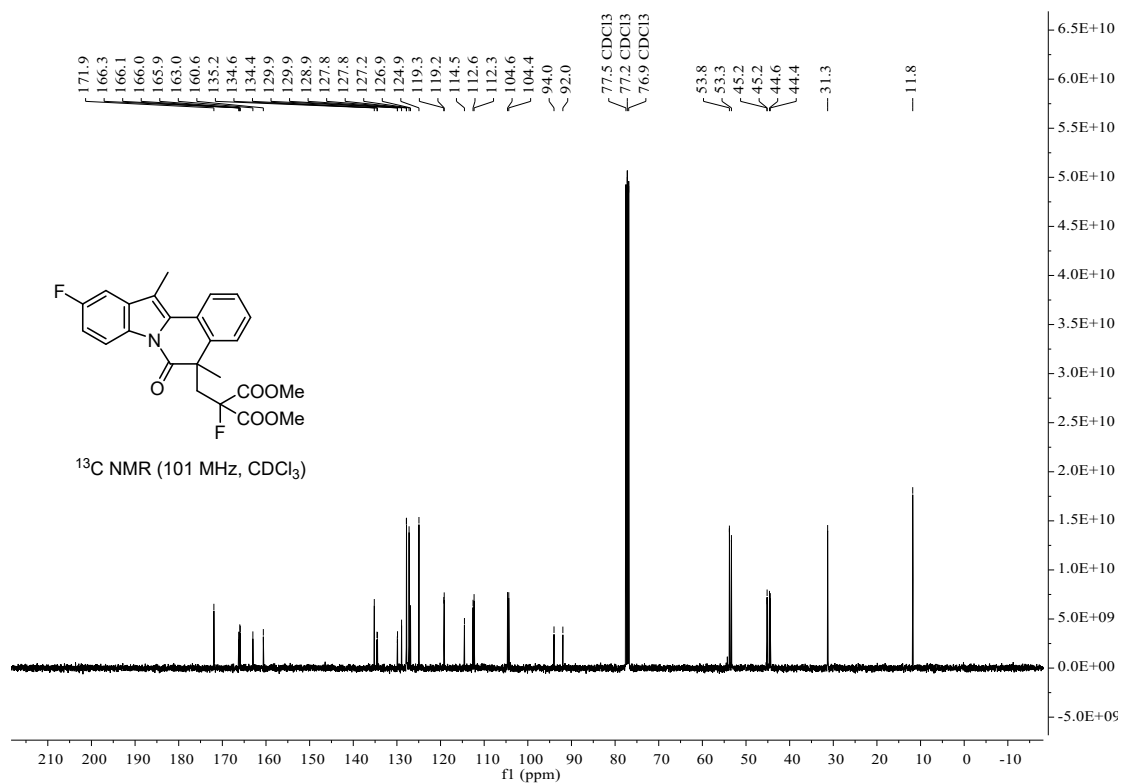

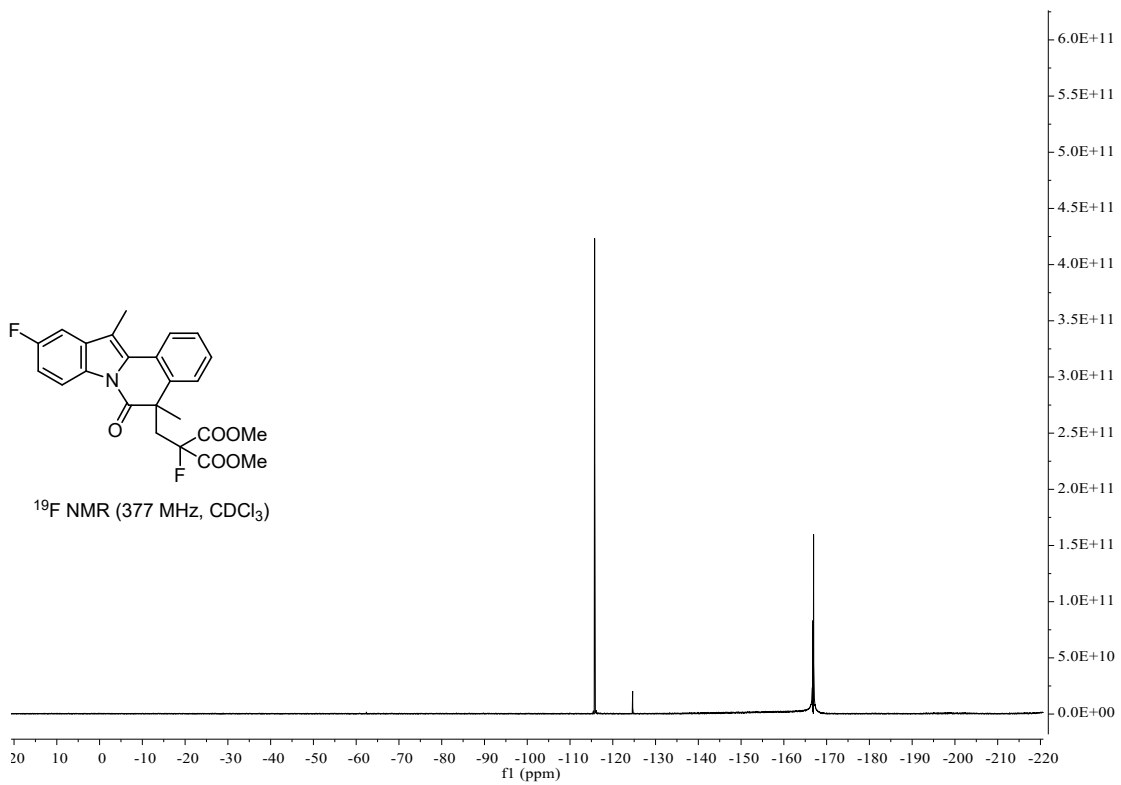



# Compound 26

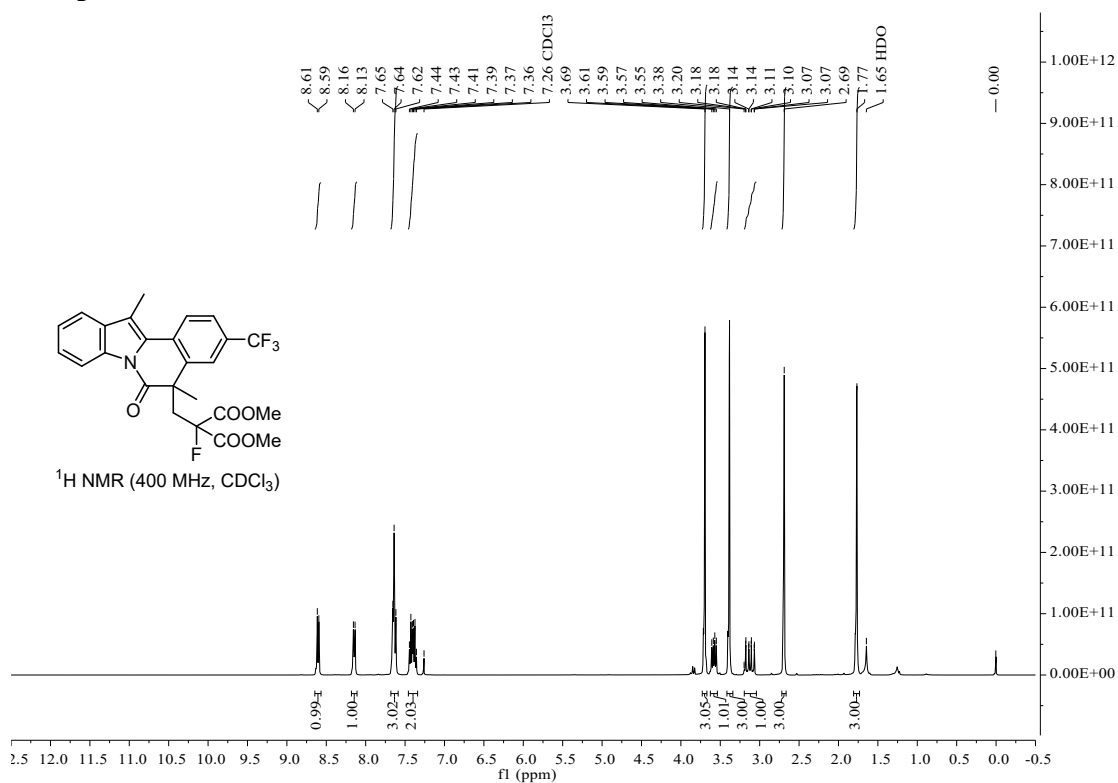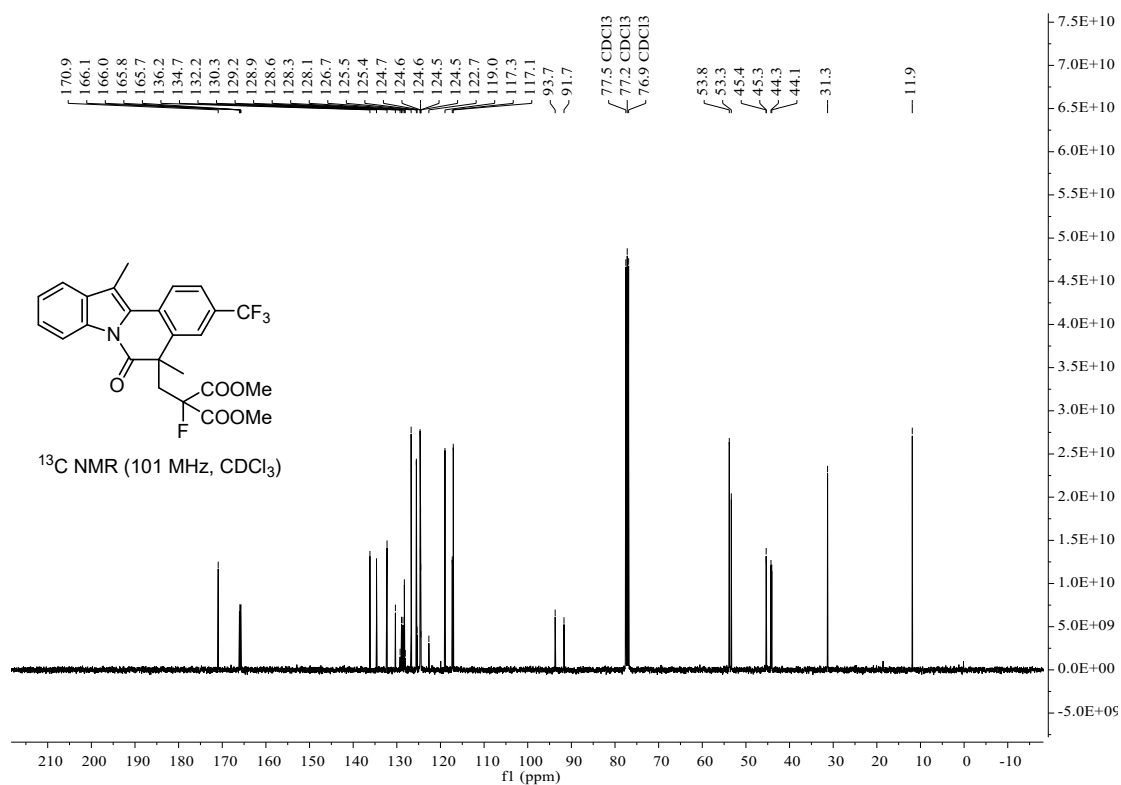

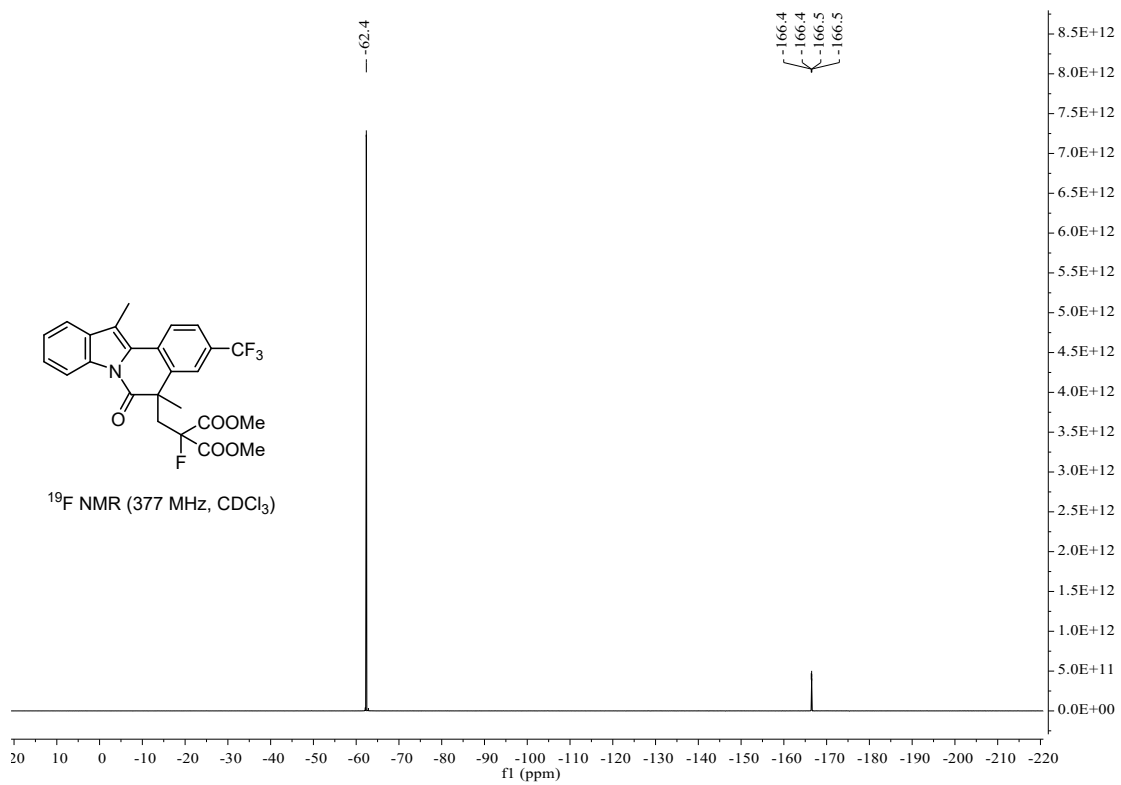

# Compound 28

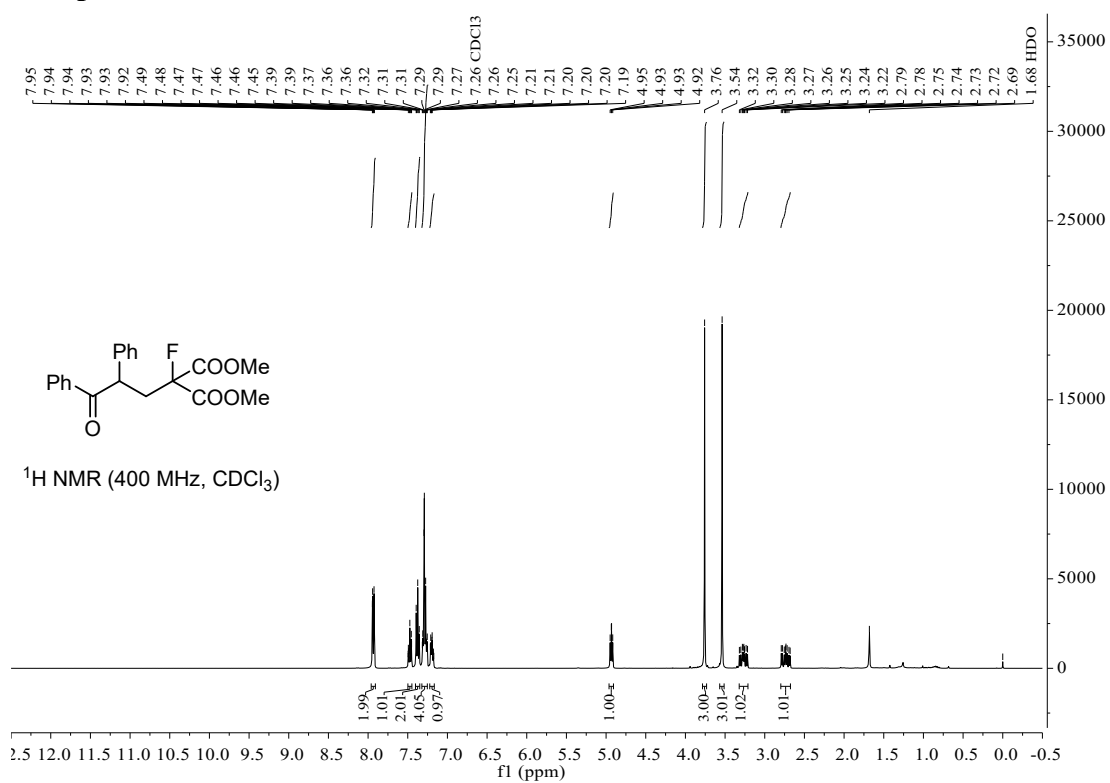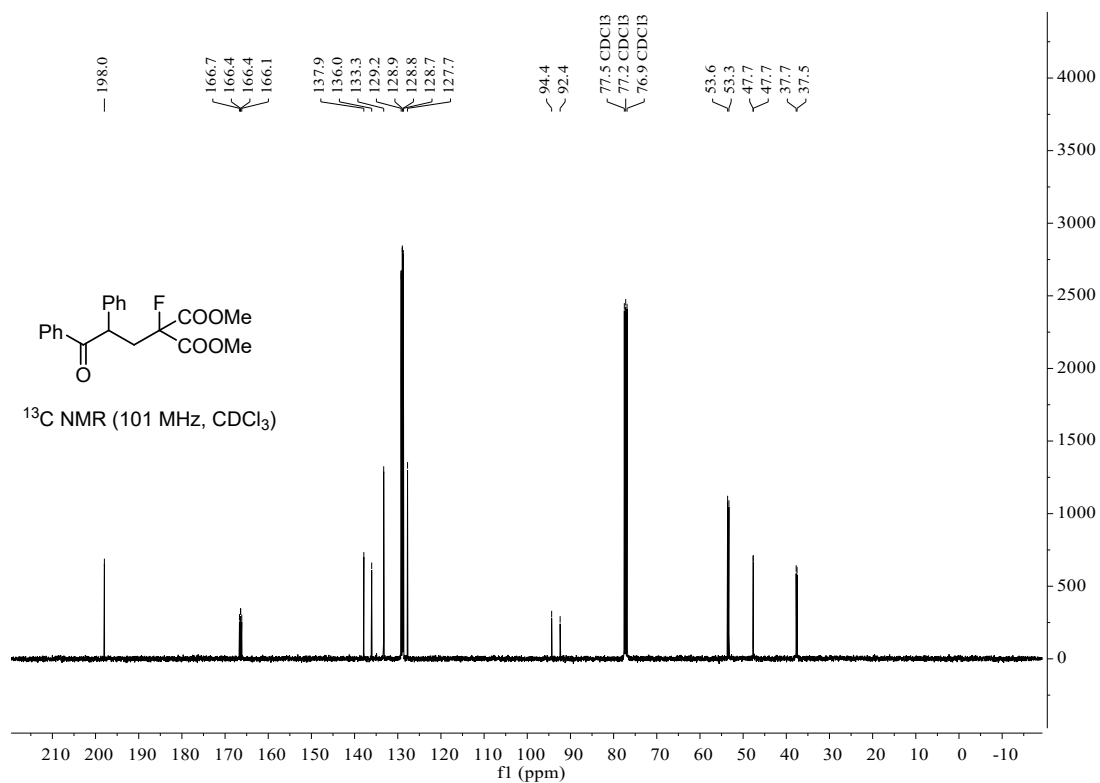

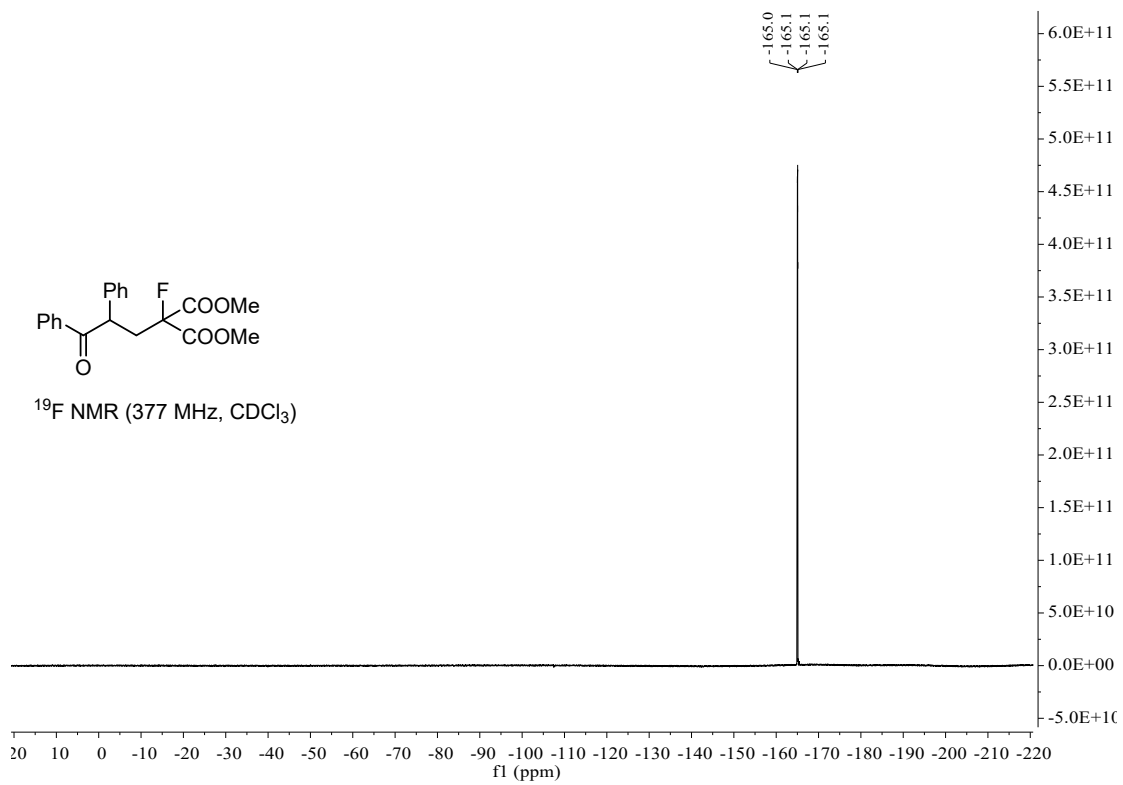

# Compound 29

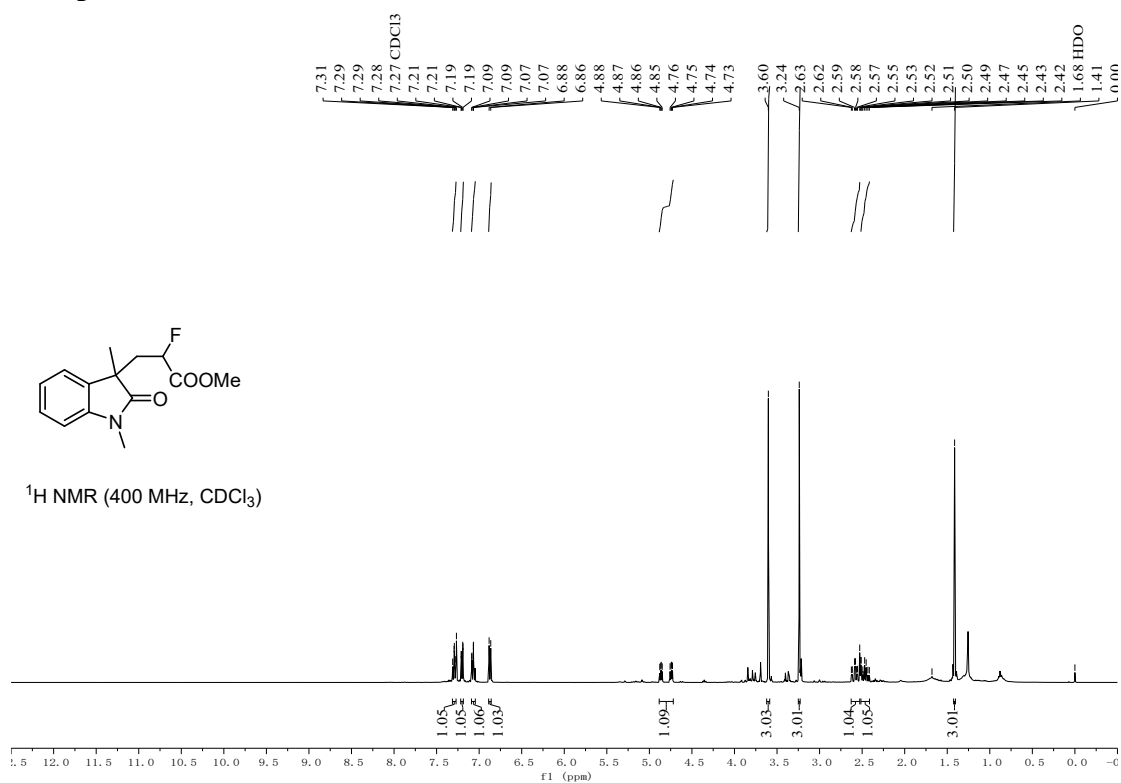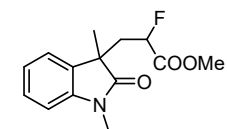

<sup>1</sup>H NMR (400 MHz, CDCl<sub>3</sub>)

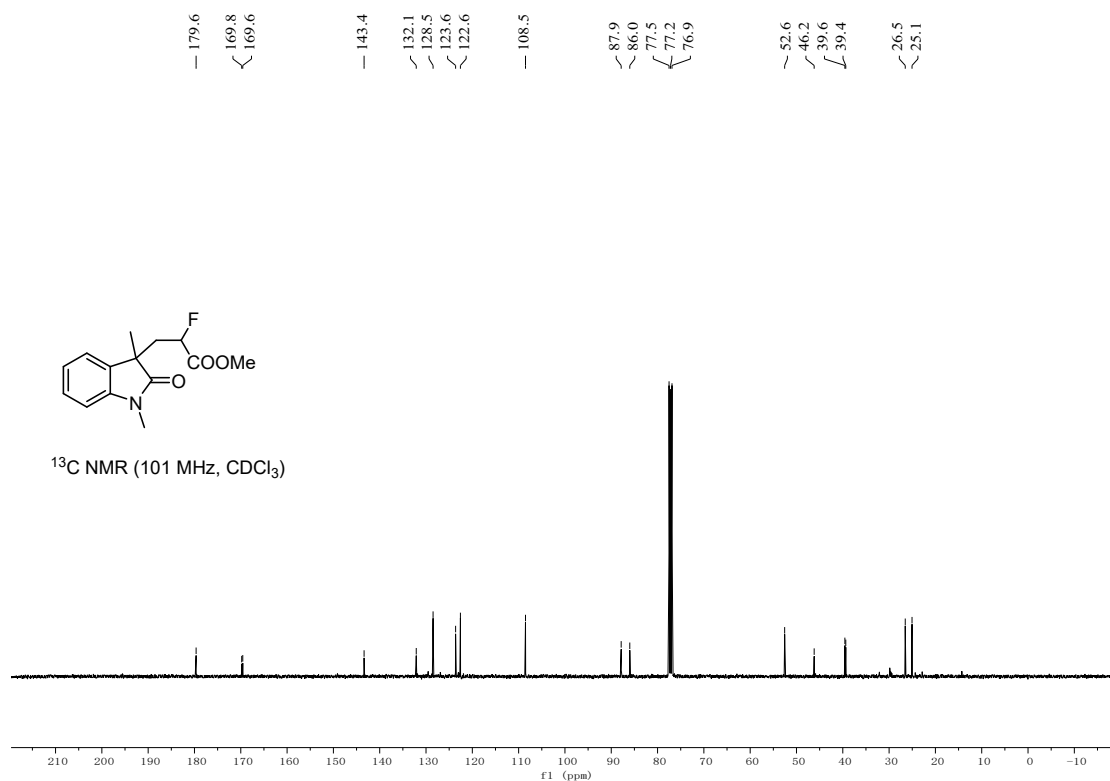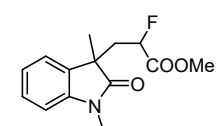

<sup>13</sup>C NMR (101 MHz, CDCl<sub>3</sub>)

-190.7  
-190.7  
-190.8  
-190.9

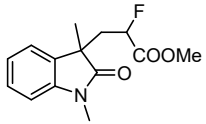

$^{19}\text{F}$  NMR (377 MHz,  $\text{CDCl}_3$ )

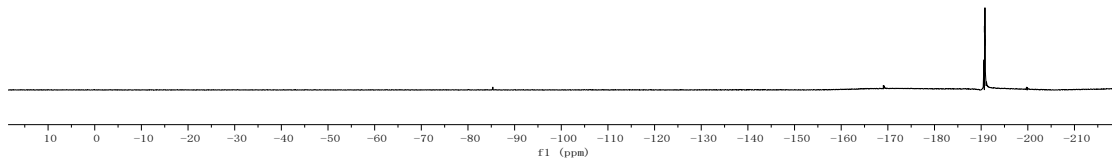

# Compound 30

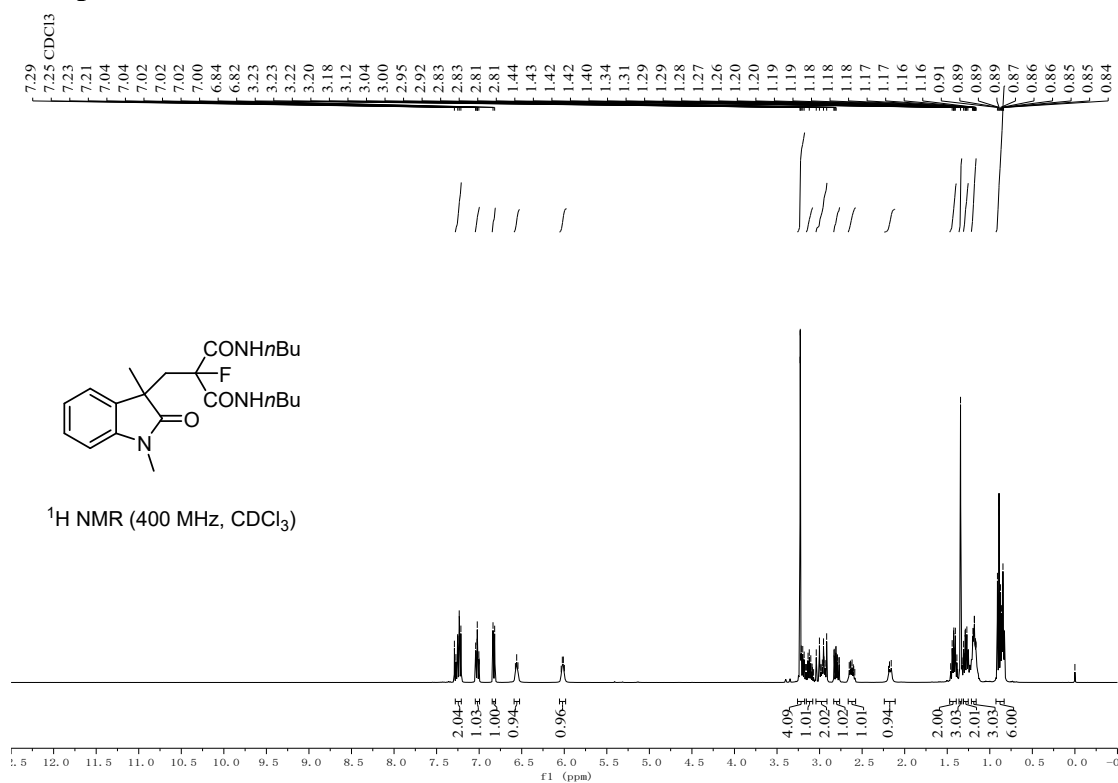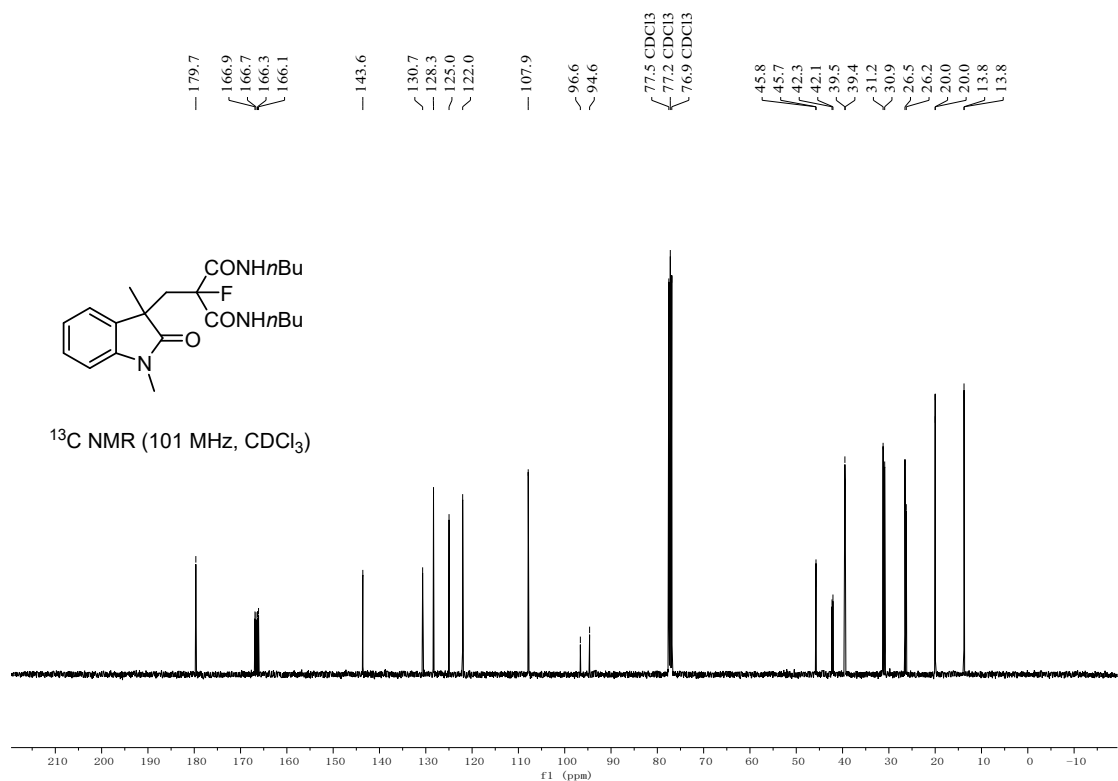

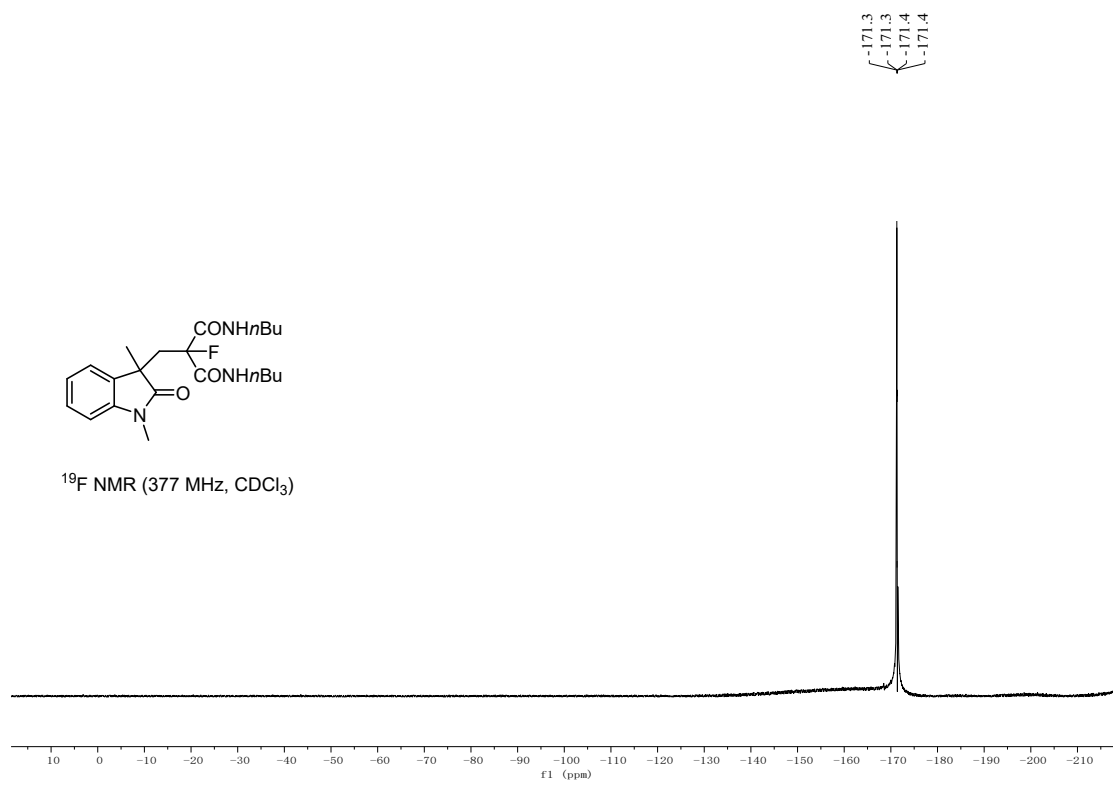



# Compound S1

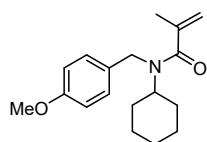

<sup>1</sup>H NMR (400 MHz, CDCl<sub>3</sub>)

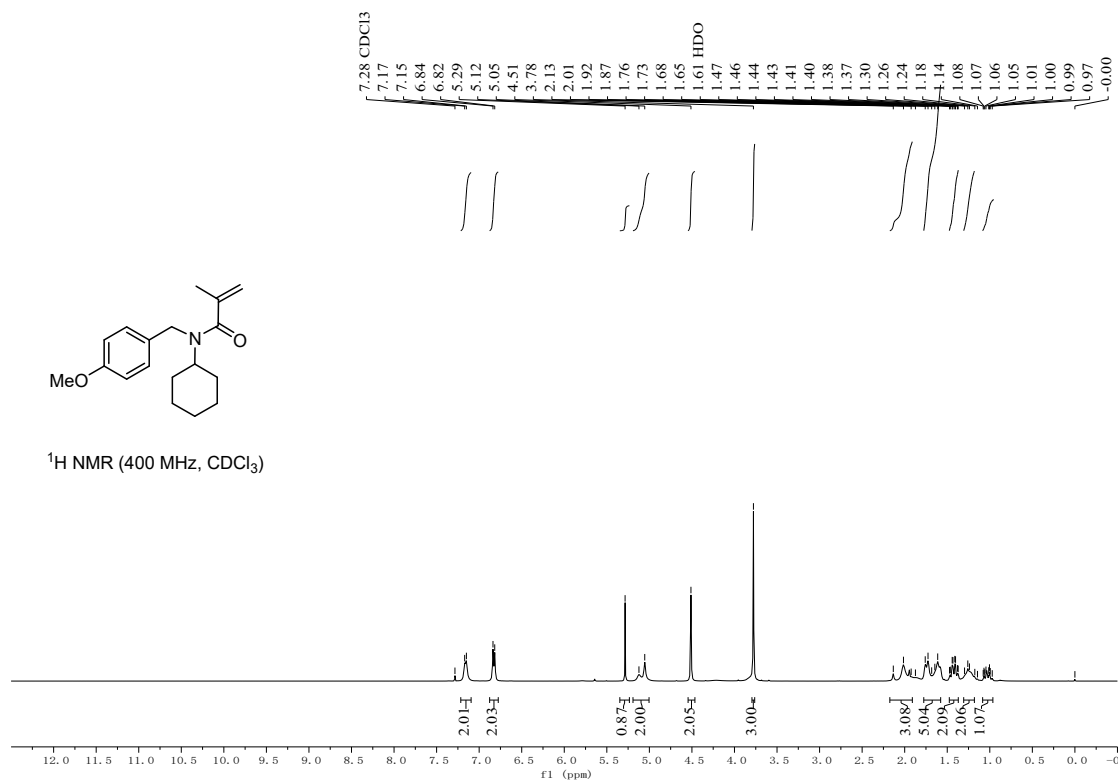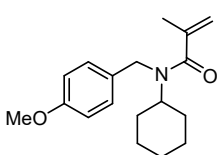

<sup>13</sup>C NMR (101 MHz, CDCl<sub>3</sub>)

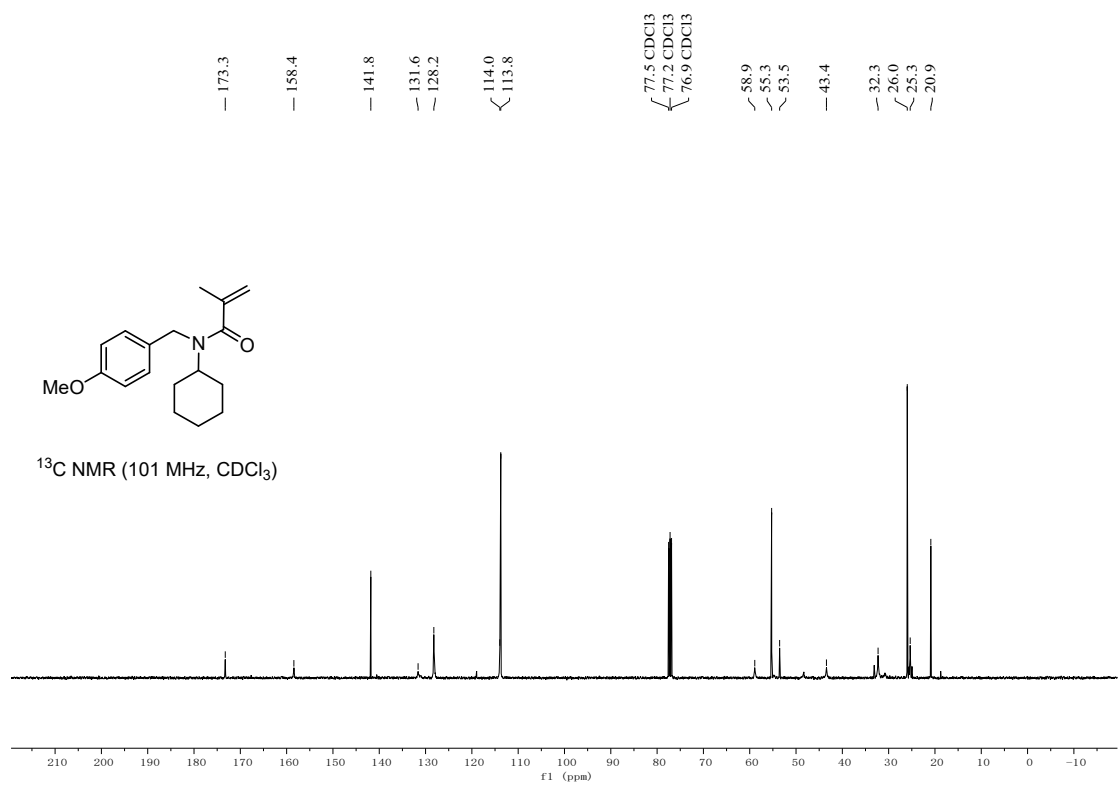

# Compound S2

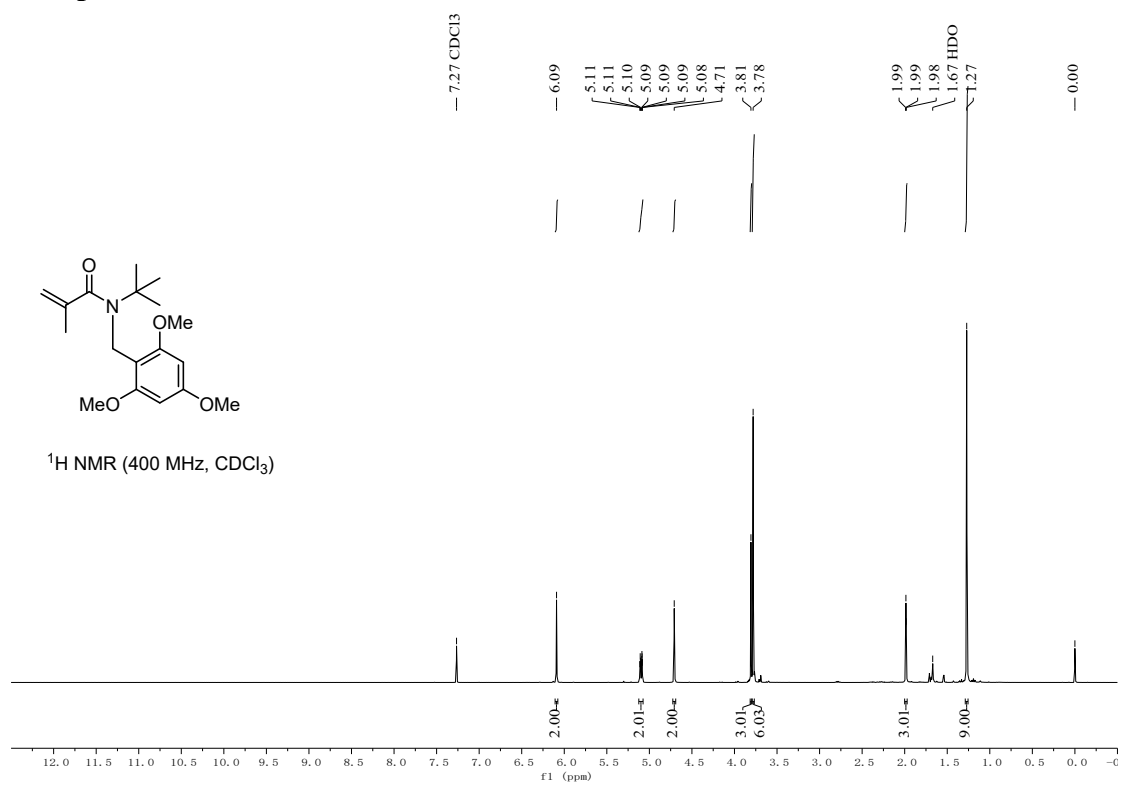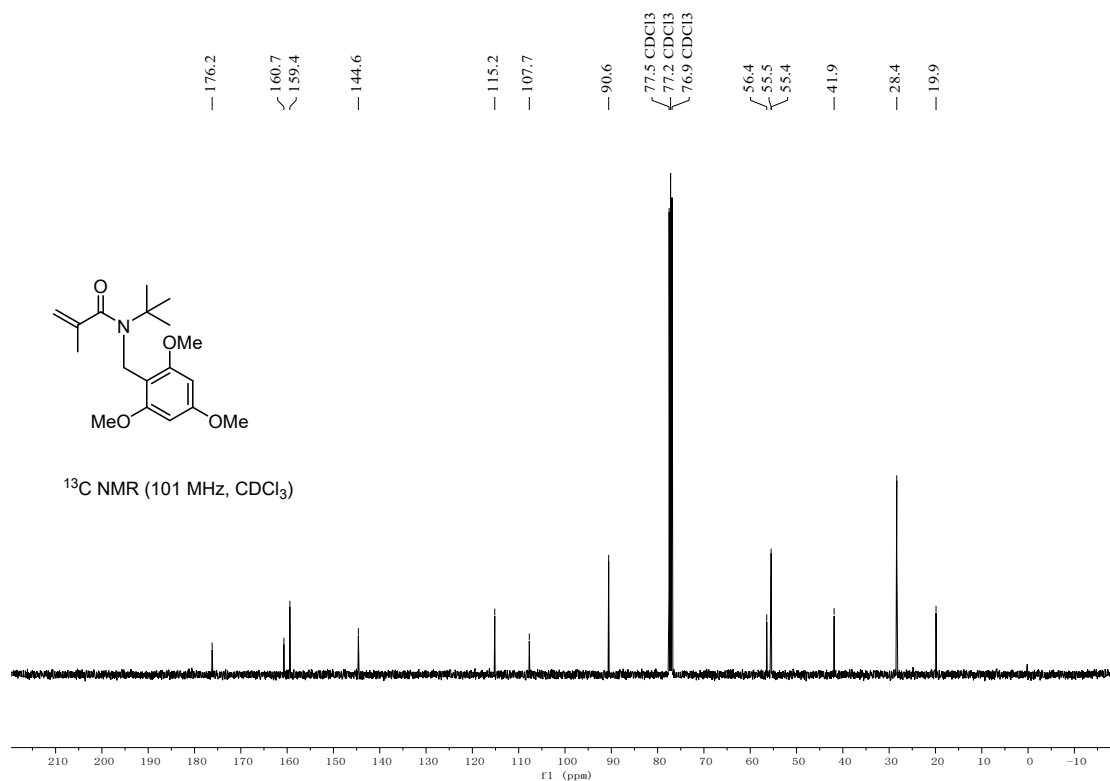

# Compound S3

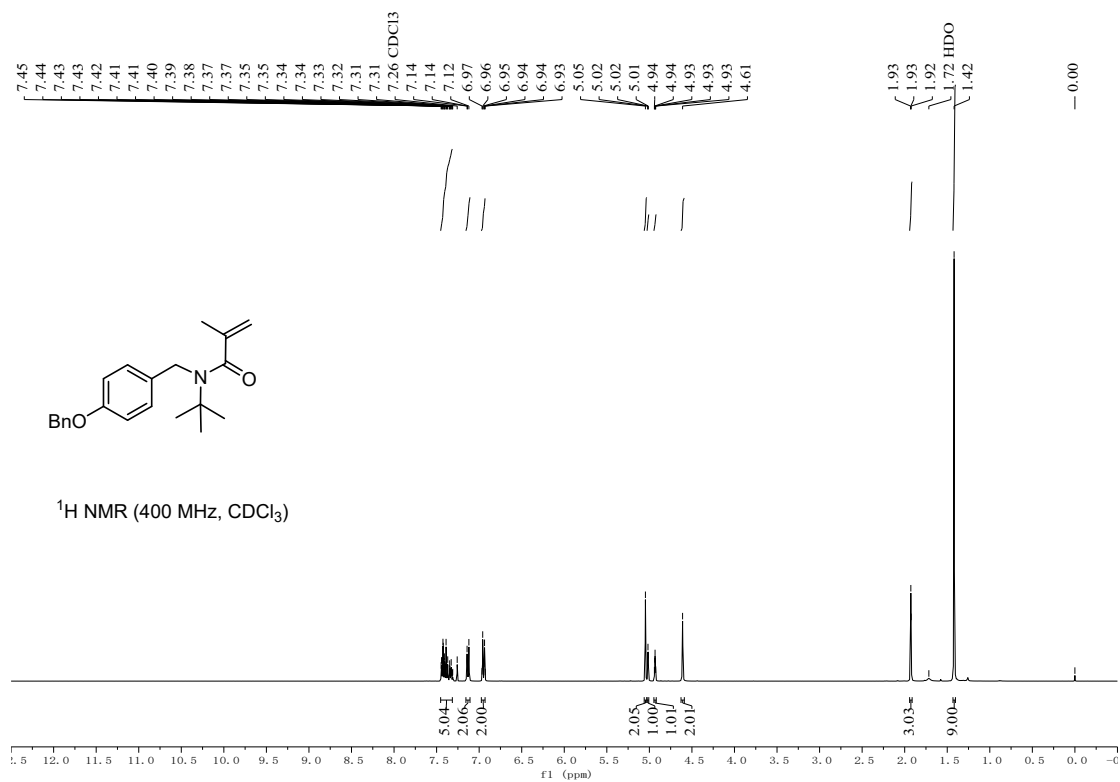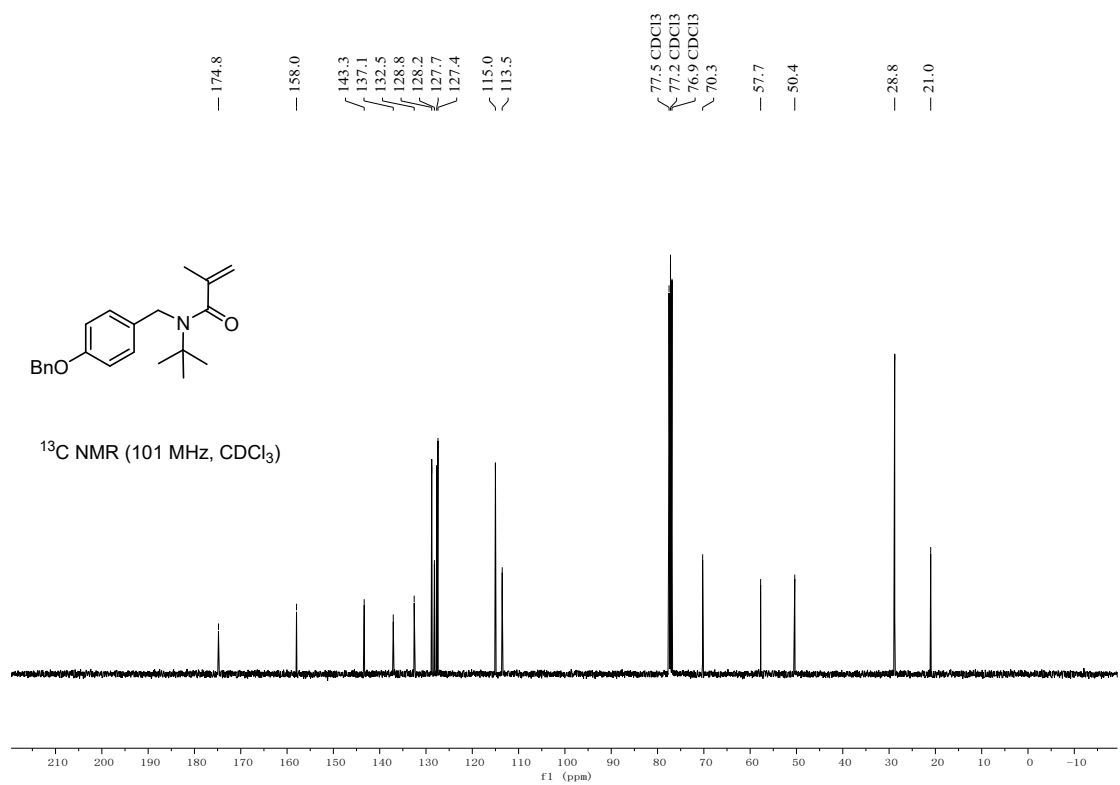

Supplement: d2ob01883g1.pdf [file d2ob01883g1.pdf]
